# Supplementary material for: The genome of the butternut canker pathogen, Ophiognomonia clavigignenti-juglandacearum shows an elevated number of genes associated with secondary metabolism and protection from host resistance responses in comparison with other members of the Diaporthales
Source: bioRxiv preprint, doi:10.1101/820977, version 1 (2019-10-28)
Supplement: Supplemental Table 1 [file 820977_file05.xlsx]

## Sheet: PFAM
pfam	ncr	mel	vpy	mgr	cpa	vma	dhe	dam	ocj	ratio	annot
PF02892.12	0	0	0	0	0	0	0	0	1	#DIV/0!	BED zinc finger
PF04426.9	0	0	0	0	0	0	0	0	1	#DIV/0!	Bul1 C terminus
PF01739.15	0	0	0	0	0	0	0	0	1	#DIV/0!	CheR methyltransferase, SAM binding domain
PF17137.1	0	0	0	0	0	0	0	0	1	#DIV/0!	Domain of unknown function (DUF5110)
PF02778.11	0	0	0	0	0	0	0	0	1	#DIV/0!	tRNA intron endonuclease, N-terminal domain
PF06309.8	0	0	0	0	0	0	0	0	1	#DIV/0!	Torsin
PF05707.9	0	0	0	0	0	0	0	0	1	#DIV/0!	Zonular occludens toxin (Zot)
PF05048.10	0	0	0	0	0	0	0	0	1	#DIV/0!	Periplasmic copper-binding protein (NosD)
PF10157.6	0	0	0	0	0	0	0	0	1	#DIV/0!	Uncharacterized conserved protein (DUF2365)
PF07382.8	0	0	0	0	0	0	0	0	1	#DIV/0!	Histone H1-like nucleoprotein HC2
PF15375.3	0	0	0	0	0	0	0	0	1	#DIV/0!	Domain of unknown function (DUF4602)
PF14388.3	0	0	0	1	0	0	1	0	4	16	Domain of unknown function (DUF4419)
PF08541.7	0	0	0	1	0	0	0	0	2	16	3-Oxoacyl-[acyl-carrier-protein (ACP)] synthase III C terminal
PF16875.2	0	0	0	0	0	0	0	1	1	8	Glycosyl hydrolase family 36 N-terminal domain
PF14609.3	0	0	0	0	0	0	1	0	1	8	gamma-Tubulin ring complex non-core subunit mod21
PF04166.9	0	0	0	0	0	0	0	1	1	8	Pyridoxal phosphate biosynthetic protein PdxA
PF11187.5	0	0	0	1	0	0	0	0	1	8	Protein of unknown function (DUF2974)
PF12893.4	0	0	0	0	0	0	0	1	1	8	Putative lumazine-binding
PF01697.24	0	0	0	0	0	0	0	1	1	8	Glycosyltransferase family 92
PF16874.2	0	0	0	0	0	0	0	1	1	8	Glycosyl hydrolase family 36 C-terminal domain
PF15617.3	0	0	0	1	0	0	0	0	1	8	C-C_Bond_Lyase of the TIM-Barrel fold
PF10846.5	0	0	1	0	0	0	0	0	1	8	Protein of unknown function (DUF2722)
PF13524.3	0	0	0	0	0	0	0	1	1	8	Glycosyl transferases group 1
PF05219.9	0	0	0	0	0	0	0	1	1	8	DREV methyltransferase
PF01464.17	0	0	0	0	0	0	0	1	1	8	Transglycosylase SLT domain
PF08207.9	0	0	0	0	0	0	1	0	1	8	Elongation factor P (EF-P) KOW-like domain
PF08925.8	0	0	0	0	0	0	0	1	1	8	Domain of Unknown Function (DUF1907)
PF13806.3	0	0	0	0	0	0	0	1	1	8	Rieske-like [2Fe-2S] domain
PF02595.12	0	0	0	1	0	0	0	0	1	8	Glycerate kinase family
PF05870.8	0	0	0	0	1	0	0	0	1	8	Phenolic acid decarboxylase (PAD)
PF07045.8	0	0	0	0	1	0	0	0	1	8	Domain of unknown function (DUF1330)
PF16487.2	0	0	0	0	1	0	0	0	1	8	Mid domain of argonaute
PF14307.3	0	0	0	0	1	0	0	0	1	8	Glycosyltransferase WbsX
PF08943.7	0	0	0	0	1	0	0	0	1	8	CsiD
PF05025.10	0	0	0	0	1	0	0	0	1	8	RbsD / FucU transport protein family
PF15916.2	0	1	1	1	1	1	0	1	5	6.66667	Domain of unknown function (DUF4743)
PF00375.15	0	1	0	1	0	0	1	1	3	6	Sodium:dicarboxylate symporter family
PF13933.3	0	1	0	2	0	0	0	1	3	6	Putative peptidase family
PF03881.11	0	7	7	4	3	7	8	5	29	5.65854	Fructosamine kinase
PF00754.22	1	0	0	1	0	0	0	1	2	5.33333	F5/8 type C domain
PF14087.3	0	1	1	1	1	1	0	1	4	5.33333	Domain of unknown function (DUF4267)
PF07452.9	0	0	0	2	0	0	2	1	3	4.8	CHRD domain
PF05572.10	2	3	0	2	0	0	0	2	5	4.44444	Pregnancy-associated plasma protein-A
PF03571.12	0	1	1	2	1	1	2	1	5	4.44444	Peptidase family M49
PF03176.12	0	0	0	1	0	0	0	1	1	4	MMPL family
PF13558.3	0	0	0	0	0	1	0	1	1	4	Putative exonuclease SbcCD, C subunit
PF06745.10	0	0	0	0	0	1	0	1	1	4	KaiC
PF02237.14	0	0	1	0	0	1	0	0	1	4	Biotin protein ligase C terminal domain
PF02244.13	1	1	0	1	0	0	0	1	2	4	Carboxypeptidase activation peptide
PF05401.8	0	1	1	0	0	1	0	1	2	4	Nodulation protein S (NodS)
PF11798.5	2	0	0	0	0	0	0	0	1	4	IMS family HHH motif
PF00560.30	1	0	2	0	0	2	0	1	3	4	Leucine Rich Repeat
PF01745.13	1	1	0	0	0	0	0	0	1	4	Isopentenyl transferase
PF14541.3	0	1	1	0	0	1	0	1	2	4	Xylanase inhibitor C-terminal
PF13229.3	1	0	2	0	0	2	2	3	5	4	Right handed beta helix region
PF13095.3	0	0	2	0	0	0	0	0	1	4	Kinetochore Sim4 complex subunit FTA2
PF01067.19	2	0	0	0	0	0	0	0	1	4	Calpain large subunit, domain III
PF03575.14	0	0	0	0	0	0	1	1	1	4	Peptidase family S51
PF02205.17	0	0	1	1	0	1	1	0	2	4	WH2 motif
PF13704.3	0	0	0	0	0	0	0	2	1	4	Glycosyl transferase family 2
PF16655.2	1	1	0	1	0	0	1	2	3	4	PhoD-like phosphatase, N-terminal domain
PF16965.2	1	0	1	0	0	0	0	0	1	4	Ceramide synthase regulator
PF14033.3	0	0	1	3	1	1	0	0	3	4	Protein of unknown function (DUF4246)
PF02797.12	1	0	1	2	1	1	0	0	3	4	Chalcone and stilbene synthases, C-terminal domain
PF08787.8	0	0	1	0	1	0	0	0	1	4	Alginate lyase
PF04266.11	0	1	0	0	1	0	0	0	1	4	ASCH domain
PF15055.3	1	0	0	0	1	0	0	0	1	4	Domain of unknown function (DUF4536)
PF07335.8	0	0	0	1	1	0	0	0	1	4	Fungal chitosanase of glycosyl hydrolase group 75
PF07912.10	0	0	0	0	1	0	1	0	1	4	ERp29, N-terminal domain
PF09996.6	0	0	0	0	1	0	0	1	1	4	Uncharacterized protein conserved in bacteria (DUF2237)
PF13204.3	0	0	0	0	1	0	0	1	1	4	Protein of unknown function (DUF4038)
PF01422.14	0	0	0	1	1	0	0	0	1	4	NF-X1 type zinc finger
PF07819.10	3	3	2	3	3	2	2	1	9	3.78947	PGAP1-like protein
PF09118.8	1	0	0	5	0	0	2	3	5	3.63636	Domain of unknown function (DUF1929)
PF07249.9	2	0	1	1	1	1	1	2	4	3.55556	Cerato-platanin
PF02065.15	0	0	2	3	1	1	0	2	4	3.55556	Melibiase
PF00089.23	1	1	0	2	0	0	1	2	3	3.42857	Trypsin
PF14464.3	0	1	1	1	1	1	1	1	3	3.42857	Prokaryotic homologs of the JAB domain
PF02040.12	0	1	1	1	1	1	1	1	3	3.42857	Arsenical pump membrane protein
PF02689.11	2	0	1	1	0	0	0	1	2	3.2	Helicase
PF05042.10	1	0	0	2	0	0	1	1	2	3.2	Caleosin related protein
PF03059.13	1	1	0	1	0	0	1	1	2	3.2	Nicotianamine synthase protein
PF04938.9	0	1	1	1	0	1	0	1	2	3.2	Survival motor neuron (SMN) interacting protein 1 (SIP1)
PF02880.13	0	0	1	1	1	1	0	1	2	3.2	Phosphoglucomutase/phosphomannomutase, alpha/beta/alpha domain III
PF03522.12	1	0	1	1	1	1	0	0	2	3.2	Solute carrier family 12
PF05141.9	0	0	0	1	2	0	1	1	2	3.2	Pyoverdine/dityrosine biosynthesis protein
PF06772.8	0	1	0	0	2	0	1	1	2	3.2	Bacterial low temperature requirement A protein (LtrA)
PF01328.14	2	3	1	4	2	1	7	9	11	3.03448	Peroxidase, family 2
PF00264.17	7	8	4	17	5	6	9	18	28	3.02703	Common central domain of tyrosinase
PF09284.7	1	1	2	0	0	2	0	2	3	3	Rhamnogalacturonan lyase B, N-terminal
PF02982.11	0	1	2	1	1	2	1	3	4	2.90909	Scytalone dehydratase
PF01425.18	3	12	18	15	14	15	14	19	40	2.90909	Amidase
PF07914.8	0	1	1	0	2	2	2	3	4	2.90909	Protein of unknown function (DUF1679)
PF11710.5	2	6	2	7	6	2	3	5	12	2.90909	G protein-coupled glucose receptor regulating Gpa2
PF04209.10	1	0	2	2	2	2	3	2	5	2.85714	homogentisate 1,2-dioxygenase
PF07691.9	0	2	3	2	3	3	1	3	6	2.82353	PA14 domain
PF08237.8	2	1	2	2	5	1	3	1	6	2.82353	PE-PPE domain
PF07110.8	0	1	3	2	6	5	1	2	7	2.8	EthD domain
PF04488.12	2	1	8	10	5	8	5	7	16	2.78261	Glycosyltransferase sugar-binding region containing DXD motif
PF13506.3	2	3	3	3	4	3	1	4	8	2.78261	Glycosyl transferase family 21
PF01432.17	0	3	5	2	4	5	1	3	8	2.78261	Peptidase family M3
PF14667.3	0	0	1	0	0	1	1	0	1	2.66667	Polysaccharide biosynthesis C-terminal domain
PF12705.4	0	0	1	0	0	1	1	0	1	2.66667	PD-(D/E)XK nuclease superfamily
PF06993.9	0	0	0	1	0	0	1	1	1	2.66667	Protein of unknown function (DUF1304)
PF01465.17	0	0	1	0	0	1	0	1	1	2.66667	GRIP domain
PF02983.11	0	1	0	1	0	0	0	1	1	2.66667	Alpha-lytic protease prodomain
PF02417.12	1	0	0	1	0	0	1	0	1	2.66667	Chromate transporter
PF04090.9	0	0	1	1	0	1	0	0	1	2.66667	RNA polymerase I specific initiation factor
PF10906.5	1	0	0	0	0	1	1	0	1	2.66667	Protein of unknown function (DUF2697)
PF10445.6	0	0	0	1	0	0	1	1	1	2.66667	Protein of unknown function (DUF2456)
PF11970.5	0	2	0	1	0	0	0	0	1	2.66667	G protein-coupled glucose receptor regulating Gpa2 C-term
PF07504.10	0	1	0	1	0	0	2	2	2	2.66667	Fungalysin/Thermolysin Propeptide Motif
PF16350.2	0	0	0	1	0	0	1	1	1	2.66667	FAD dependent oxidoreductase central domain
PF13343.3	0	1	0	2	0	0	0	0	1	2.66667	Bacterial extracellular solute-binding protein
PF01936.15	0	1	0	0	0	0	1	1	1	2.66667	NYN domain
PF12867.4	0	1	0	2	0	0	0	0	1	2.66667	DinB superfamily
PF04324.12	1	0	0	1	0	0	0	1	1	2.66667	BFD-like [2Fe-2S] binding domain
PF06500.8	1	0	2	2	0	3	2	2	4	2.66667	Alpha/beta hydrolase of unknown function (DUF1100)
PF14518.3	0	0	1	0	0	1	1	0	1	2.66667	Iron-containing redox enzyme
PF16866.2	1	0	1	0	0	1	0	0	1	2.66667	PHD-finger
PF03351.14	0	0	0	0	0	1	1	1	1	2.66667	DOMON domain
PF05677.9	2	0	0	1	0	0	0	0	1	2.66667	Chlamydia CHLPS protein (DUF818)
PF16155.2	0	1	0	0	0	0	1	1	1	2.66667	Domain of unknown function (DUF4863)
PF13924.3	0	0	0	2	0	0	0	1	1	2.66667	Lipocalin-like domain
PF03096.11	0	2	1	1	0	1	0	1	2	2.66667	Ndr family
PF02128.12	0	1	0	1	0	0	2	2	2	2.66667	Fungalysin metallopeptidase (M36)
PF13740.3	0	0	1	0	0	1	1	0	1	2.66667	ACT domain
PF13449.3	0	1	0	1	0	0	0	1	1	2.66667	Esterase-like activity of phytase
PF13468.3	0	1	1	1	0	1	1	1	2	2.66667	Glyoxalase-like domain
PF03067.12	0	1	1	4	1	1	2	5	5	2.66667	Lytic polysaccharide mono-oxygenase, cellulose-degrading
PF00544.16	1	3	6	2	4	6	9	11	14	2.66667	Pectate lyase
PF09260.8	1	1	2	1	2	2	4	5	6	2.66667	Domain of unknown function (DUF1966)
PF00195.16	1	0	1	2	1	1	1	2	3	2.66667	Chalcone and stilbene synthases, N-terminal domain
PF07488.9	1	0	1	1	1	1	1	0	2	2.66667	Glycosyl hydrolase family 67 middle domain
PF03632.12	0	1	1	0	1	1	1	1	2	2.66667	Glycosyl hydrolase family 65 central catalytic domain
PF02224.15	0	0	2	1	1	1	0	1	2	2.66667	Cytidylate kinase
PF05236.11	1	0	1	1	1	1	0	1	2	2.66667	Transcription initiation factor TFIID component TAF4 family
PF16355.2	0	0	0	1	1	0	1	3	2	2.66667	Domain of unknown function (DUF4982)
PF13912.3	1	2	2	3	3	3	2	2	6	2.66667	C2H2-type zinc finger
PF14613.3	0	1	1	1	1	1	0	1	2	2.66667	Protein of unknown function (DUF4449)
PF03950.15	1	0	2	2	2	2	1	2	4	2.66667	tRNA synthetases class I (E and Q), anti-codon binding domain
PF02574.13	0	0	1	1	1	1	1	1	2	2.66667	Homocysteine S-methyltransferase
PF03648.11	1	0	1	1	1	1	1	0	2	2.66667	Glycosyl hydrolase family 67 N-terminus
PF04194.10	1	0	1	1	1	0	1	1	2	2.66667	Programmed cell death protein 2, C-terminal putative domain
PF11720.5	0	0	1	1	1	1	1	1	2	2.66667	Peptidase inhibitor I78 family
PF04820.11	0	1	0	1	1	1	1	1	2	2.66667	Tryptophan halogenase
PF05406.12	1	0	1	1	1	1	0	1	2	2.66667	WGR domain
PF03636.12	0	1	1	0	1	1	2	0	2	2.66667	Glycosyl hydrolase family 65, N-terminal domain
PF07477.9	1	0	1	1	1	1	1	0	2	2.66667	Glycosyl hydrolase family 67 C-terminus
PF09813.6	0	0	1	0	1	0	0	1	1	2.66667	Coiled-coil domain-containing protein 56
PF02617.14	0	0	1	0	1	0	0	1	1	2.66667	ATP-dependent Clp protease adaptor protein ClpS
PF04120.9	0	0	0	0	1	0	1	1	1	2.66667	Low affinity iron permease
PF00659.15	0	0	0	1	1	0	0	1	1	2.66667	POLO box duplicated region
PF05001.10	0	0	1	0	1	1	0	0	1	2.66667	RNA polymerase Rpb1 C-terminal repeat
PF09370.7	0	0	1	0	1	0	0	1	1	2.66667	Phosphoenolpyruvate hydrolase-like
PF11411.5	0	0	1	0	1	1	0	0	1	2.66667	DNA ligase IV
PF07286.9	0	1	0	1	1	0	0	0	1	2.66667	Protein of unknown function (DUF1445)
PF10042.6	0	0	1	0	1	1	0	0	1	2.66667	Uncharacterized conserved protein (DUF2278)
PF02566.16	0	0	0	0	1	0	1	1	1	2.66667	OsmC-like protein
PF07998.8	0	1	0	0	1	0	1	0	1	2.66667	Peptidase family M54
PF00932.16	0	0	1	0	1	1	0	0	1	2.66667	Lamin Tail Domain
PF12800.4	0	0	0	1	1	0	0	1	1	2.66667	4Fe-4S binding domain
PF08532.7	0	0	1	0	1	1	0	0	1	2.66667	Beta-galactosidase trimerisation domain
PF06057.8	0	1	0	0	2	0	0	0	1	2.66667	Bacterial virulence protein (VirJ)
PF00775.18	2	3	6	4	10	6	3	12	15	2.6087	Dioxygenase
PF03006.17	3	3	2	3	3	3	2	3	7	2.54545	Haemolysin-III related
PF02469.19	2	2	2	3	2	2	2	4	6	2.52632	Fasciclin domain
PF10282.6	2	3	5	4	3	5	3	10	11	2.51429	Lactonase, 7-bladed beta-propeller
PF05631.11	0	0	2	3	2	2	3	4	5	2.5	Sugar-tranasporters, 12 TM
PF02055.13	1	2	2	1	2	2	1	2	4	2.46154	Glycosyl hydrolase family 30 TIM-barrel domain
PF00570.20	1	0	3	1	2	3	1	2	4	2.46154	HRDC domain
PF08031.9	5	10	13	18	13	15	10	24	33	2.44444	Berberine and berberine like
PF00001.18	2	3	2	3	5	3	3	2	7	2.43478	7 transmembrane receptor (rhodopsin family)
PF00230.17	0	3	6	6	6	6	7	9	13	2.4186	Major intrinsic protein
PF08531.7	0	2	1	1	1	1	2	2	3	2.4	Alpha-L-rhamnosidase N-terminal domain
PF04140.11	2	1	1	1	1	1	1	2	3	2.4	Isoprenylcysteine carboxyl methyltransferase (ICMT) family
PF01384.17	2	1	0	3	1	0	1	2	3	2.4	Phosphate transporter family
PF12340.5	0	1	2	3	1	1	1	1	3	2.4	Protein of unknown function (DUF3638)
PF04172.13	0	1	2	1	1	2	1	2	3	2.4	LrgB-like family
PF00002.21	0	1	2	3	2	2	0	0	3	2.4	7 transmembrane receptor (Secretin family)
PF10056.6	0	2	1	2	2	1	0	2	3	2.4	Uncharacterized conserved protein (DUF2293)
PF05207.10	0	0	2	2	2	2	1	1	3	2.4	CSL zinc finger
PF01636.20	6	16	19	14	17	20	22	17	39	2.38168	Phosphotransferase enzyme family
PF14521.3	2	0	0	8	0	0	3	4	5	2.35294	Lysine-specific metallo-endopeptidase
PF01184.16	1	2	2	2	2	1	4	3	5	2.35294	GPR1/FUN34/yaaH family
PF03815.16	2	1	2	2	3	1	3	3	5	2.35294	LCCL domain
PF06738.9	0	2	2	1	3	3	3	3	5	2.35294	Putative threonine/serine exporter
PF02133.12	1	9	11	7	8	11	7	11	19	2.33846	Permease for cytosine/purines, uracil, thiamine, allantoin
PF10250.6	1	3	2	1	4	6	6	8	9	2.32258	GDP-fucose protein O-fucosyltransferase
PF12296.5	0	5	1	10	5	1	10	13	13	2.31111	Hydrophobic surface binding protein A
PF03572.15	1	2	0	3	0	0	0	1	2	2.28571	Peptidase family S41
PF08553.7	1	0	1	1	0	2	1	1	2	2.28571	VID27 cytoplasmic protein
PF01773.17	1	0	1	1	1	1	1	1	2	2.28571	Na+ dependent nucleoside transporter N-terminus
PF03600.13	1	2	2	2	2	2	1	2	4	2.28571	Citrate transporter
PF05821.8	1	0	1	1	1	1	1	1	2	2.28571	NADH-ubiquinone oxidoreductase ASHI subunit (CI-ASHI or NDUFB8)
PF13685.3	2	2	4	3	3	3	1	3	6	2.28571	Iron-containing alcohol dehydrogenase
PF06027.9	0	1	1	1	1	1	1	1	2	2.28571	Solute carrier family 35
PF04182.9	1	1	1	1	1	1	0	1	2	2.28571	B-block binding subunit of TFIIIC
PF02877.11	1	1	1	1	1	1	0	1	2	2.28571	Poly(ADP-ribose) polymerase, regulatory domain
PF12234.5	1	1	1	1	1	1	0	1	2	2.28571	RAVE protein 1 C terminal
PF11718.5	1	1	1	1	1	1	0	1	2	2.28571	Pre-mRNA 3'-end-processing endonuclease polyadenylation factor C-term
PF07156.11	1	0	1	1	1	1	1	1	2	2.28571	Prenylcysteine lyase
PF14658.3	1	1	1	1	1	1	0	1	2	2.28571	EF-hand domain
PF04442.11	1	1	1	1	1	1	0	1	2	2.28571	Cytochrome c oxidase assembly protein CtaG/Cox11
PF15902.2	0	1	1	1	1	1	1	1	2	2.28571	Sortilin, neurotensin receptor 3,
PF07662.10	1	0	1	1	1	1	1	1	2	2.28571	Na+ dependent nucleoside transporter C-terminus
PF05983.8	1	0	1	1	1	1	1	1	2	2.28571	MED7 protein
PF13826.3	1	0	1	0	1	1	2	1	2	2.28571	Domain of unknown function (DUF4188)
PF11954.5	0	0	2	0	1	2	1	1	2	2.28571	Domain of unknown function (DUF3471)
PF08545.7	1	0	2	1	1	1	0	1	2	2.28571	3-Oxoacyl-[acyl-carrier-protein (ACP)] synthase III
PF08555.7	1	1	1	1	1	1	0	1	2	2.28571	Eukaryotic family of unknown function (DUF1754)
PF07542.8	0	1	1	1	1	1	1	1	2	2.28571	ATP12 chaperone protein
PF01922.14	1	1	1	1	1	1	0	1	2	2.28571	SRP19 protein
PF01200.15	1	0	1	1	1	1	1	1	2	2.28571	Ribosomal protein S28e
PF02223.14	1	1	1	1	1	1	0	1	2	2.28571	Thymidylate kinase
PF06813.10	0	1	1	1	1	1	1	1	2	2.28571	Nodulin-like
PF00275.17	1	1	1	1	1	1	0	1	2	2.28571	EPSP synthase (3-phosphoshikimate 1-carboxyvinyltransferase)
PF05691.9	0	0	1	2	1	1	1	1	2	2.28571	Raffinose synthase or seed imbibition protein Sip1
PF06516.8	1	1	1	0	1	1	1	1	2	2.28571	Purine nucleoside permease (NUP)
PF01083.19	3	8	7	18	15	7	7	12	22	2.28571	Cutinase
PF08592.8	3	2	4	2	6	4	2	5	8	2.28571	Domain of unknown function (DUF1772)
PF02423.12	0	0	1	1	2	1	0	2	2	2.28571	Ornithine cyclodeaminase/mu-crystallin family
PF01731.17	0	1	1	0	2	1	1	1	2	2.28571	Arylesterase
PF05462.8	2	3	1	4	5	2	4	4	7	2.24	Slime mold cyclic AMP receptor
PF13481.3	1	1	2	1	0	3	1	2	3	2.18182	AAA domain
PF00024.23	1	1	0	1	0	0	3	5	3	2.18182	PAN domain
PF14587.3	1	2	2	0	1	2	1	2	3	2.18182	O-Glycosyl hydrolase family 30
PF00723.18	1	1	2	2	2	2	0	1	3	2.18182	Glycosyl hydrolases family 15
PF04248.9	0	1	1	2	2	1	2	2	3	2.18182	Domain of unknown function (DUF427)
PF13679.3	1	1	1	1	2	1	2	2	3	2.18182	Methyltransferase domain
PF00478.22	3	3	3	4	4	4	1	4	7	2.15385	IMP dehydrogenase / GMP reductase domain
PF13520.3	17	24	39	29	39	38	32	44	70	2.1374	Amino acid permease
PF02102.12	2	0	0	6	0	0	3	4	4	2.13333	Deuterolysin metalloprotease (M35) family
PF09423.7	2	2	1	3	1	1	2	3	4	2.13333	PhoD-like phosphatase
PF01262.18	1	1	2	2	2	2	2	3	4	2.13333	Alanine dehydrogenase/PNT, C-terminal domain
PF00331.17	4	3	3	6	4	3	2	5	8	2.13333	Glycosyl hydrolase family 10
PF00474.14	2	5	4	3	5	4	1	6	8	2.13333	Sodium:solute symporter family
PF16862.2	1	3	5	2	7	5	1	6	8	2.13333	Glycosyl hydrolase family 79 C-terminal beta domain
PF13527.4	3	1	0	2	4	0	2	3	4	2.13333	Acetyltransferase (GNAT) domain
PF00931.19	1	4	1	5	4	0	0	0	4	2.13333	NB-ARC domain
PF12138.5	1	2	2	1	3	2	4	4	5	2.10526	Spherulation-specific family 4
PF07731.11	9	5	9	17	16	9	12	18	25	2.10526	Multicopper oxidase
PF16499.2	0	1	3	4	4	3	1	3	5	2.10526	Alpha galactosidase A
PF13508.4	6	7	15	13	20	13	10	15	26	2.10101	Acetyltransferase (GNAT) domain
PF07732.12	9	5	8	17	16	10	12	15	24	2.08696	Multicopper oxidase
PF00457.14	1	3	2	5	4	2	3	3	6	2.08696	Glycosyl hydrolases family 11
PF13745.3	0	1	3	6	5	2	2	4	6	2.08696	HxxPF-repeated domain
PF00324.18	16	22	39	30	39	38	27	43	66	2.07874	Amino acid permease
PF00732.16	8	24	36	26	25	39	26	46	59	2.05217	GMC oxidoreductase
PF00657.19	5	5	10	11	14	10	6	17	20	2.05128	GDSL-like Lipase/Acylhydrolase
PF13424.3	4	7	4	7	7	5	4	9	12	2.04255	Tetratricopeptide repeat
PF13472.3	6	4	10	14	12	11	8	18	21	2.0241	GDSL-like Lipase/Acylhydrolase family
PF09792.6	0	0	1	1	0	1	0	1	1	2	Ubiquitin 3 binding protein But2 C-terminal domain
PF03746.13	0	0	1	0	0	1	1	1	1	2	LamB/YcsF family
PF06342.9	0	1	0	0	0	0	1	2	1	2	Alpha/beta hydrolase of unknown function (DUF1057)
PF12872.4	0	2	0	0	0	0	1	1	1	2	OST-HTH/LOTUS domain
PF09668.7	0	0	0	1	0	1	1	1	1	2	Aspartyl protease
PF07250.8	0	0	0	2	0	0	1	1	1	2	Glyoxal oxidase N-terminus
PF12634.4	1	0	1	1	0	1	0	0	1	2	Inheritance of peroxisomes protein 1
PF08219.8	1	1	1	1	0	0	0	0	1	2	Outer membrane protein TOM13
PF00077.17	0	0	0	1	0	1	1	1	1	2	Retroviral aspartyl protease
PF02197.14	0	0	1	0	0	1	1	1	1	2	Regulatory subunit of type II PKA R-subunit
PF07510.8	1	1	0	1	0	0	0	1	1	2	Protein of unknown function (DUF1524)
PF12009.5	0	0	1	1	0	1	0	1	1	2	Telomerase ribonucleoprotein complex - RNA binding domain
PF04931.10	0	0	1	1	0	1	0	1	1	2	DNA polymerase phi
PF06218.8	0	0	1	1	0	1	0	1	1	2	Nitrogen permease regulator 2
PF05532.9	0	1	1	0	0	0	1	1	1	2	CsbD-like
PF11338.5	0	0	1	1	0	1	0	1	1	2	Protein of unknown function (DUF3140)
PF06821.10	0	1	1	0	0	1	0	1	1	2	Serine hydrolase
PF13816.3	0	0	1	0	0	1	1	1	1	2	Haem-containing dehydratase
PF04930.12	1	1	0	0	0	0	1	1	1	2	FUN14 family
PF03222.10	0	0	1	1	0	1	1	0	1	2	Tryptophan/tyrosine permease family
PF00625.18	0	1	1	2	0	2	1	1	2	2	Guanylate kinase
PF16550.2	1	0	1	1	0	1	0	0	1	2	UCH-binding domain
PF12348.5	0	0	1	1	0	1	0	1	1	2	CLASP N terminal
PF04658.10	0	0	1	1	0	1	0	1	1	2	TAFII55 protein conserved region
PF12326.5	0	1	0	0	0	1	1	1	1	2	N-glycosylation protein
PF04004.10	0	0	1	1	0	0	1	1	1	2	Leo1-like protein
PF00221.16	1	1	0	1	0	1	0	0	1	2	Aromatic amino acid lyase
PF12550.5	0	0	1	1	0	1	0	1	1	2	Transcriptional activator of glycolytic enzymes
PF01522.18	3	4	4	12	3	5	5	8	11	2	Polysaccharide deacetylase
PF14683.3	1	2	4	1	2	4	4	6	6	2	Polysaccharide lyase family 4, domain III
PF13582.3	1	2	1	3	1	1	1	2	3	2	Metallo-peptidase family M12B Reprolysin-like
PF01496.16	1	1	1	1	1	1	1	1	2	2	V-type ATPase 116kDa subunit family
PF12359.5	0	1	2	2	1	0	1	1	2	2	Protein of unknown function (DUF3645)
PF01409.17	3	1	2	2	2	2	2	2	4	2	tRNA synthetases class II core domain (F)
PF11312.5	1	0	2	1	1	2	0	1	2	2	Putative SAM-dependent methyltransferase
PF03055.12	2	3	3	3	3	3	1	6	6	2	Retinal pigment epithelial membrane protein
PF12222.5	1	2	3	1	2	3	2	2	4	2	Peptide N-acetyl-beta-D-glucosaminyl asparaginase amidase A
PF16863.2	4	2	2	1	2	2	1	2	4	2	N-terminal barrel of NtMGAM and CtMGAM, maltase-glucoamylase
PF15612.3	2	1	1	1	1	1	0	1	2	2	WSTF, HB1, Itc1p, MBD9 motif 1
PF08565.8	1	1	1	1	1	1	1	1	2	2	Cdc37 Hsp90 binding domain
PF03234.11	1	1	1	1	1	1	1	1	2	2	Cdc37 N terminal kinase binding
PF07522.11	2	1	1	1	1	1	0	1	2	2	DNA repair metallo-beta-lactamase
PF00194.18	1	1	0	2	1	0	1	2	2	2	Eukaryotic-type carbonic anhydrase
PF00955.18	1	1	1	1	1	1	1	1	2	2	HCO3- transporter family
PF08172.9	1	1	1	1	1	1	1	1	2	2	CASP C terminal
PF02809.17	1	1	0	1	1	0	1	3	2	2	Ubiquitin interaction motif
PF02585.14	1	1	1	1	1	1	1	1	2	2	GlcNAc-PI de-N-acetylase
PF09295.7	1	1	1	1	1	1	1	1	2	2	ChAPs (Chs5p-Arf1p-binding proteins)
PF00686.16	1	2	2	3	2	2	1	3	4	2	Starch binding domain
PF12481.5	1	1	1	1	1	1	1	1	2	2	Aluminium induced protein
PF08154.9	2	1	1	1	1	1	0	1	2	2	NLE (NUC135) domain
PF08510.9	1	1	1	1	1	1	1	1	2	2	PIG-P
PF13650.3	0	1	0	2	1	1	1	2	2	2	Aspartyl protease
PF08564.7	1	1	1	1	1	1	1	1	2	2	Cdc37 C terminal domain
PF02958.17	0	2	4	2	4	4	4	4	6	2	Ecdysteroid kinase
PF00793.17	1	0	2	2	2	2	1	2	3	2	DAHP synthetase I family
PF09286.8	3	6	10	5	10	10	5	7	14	2	Pro-kumamolisin, activation domain
PF08390.8	1	2	2	2	3	3	1	2	4	2	TRAM1-like protein
PF16062.2	0	1	0	0	1	0	1	1	1	2	Domain of unknown function (DUF4804)
PF17104.2	0	0	1	1	1	0	0	1	1	2	Domain of unknown function (DUF5102)
PF08210.8	0	0	1	0	1	1	1	0	1	2	APOBEC-like N-terminal domain
PF00871.14	0	0	1	1	1	1	0	0	1	2	Acetokinase family
PF08232.9	0	0	1	0	1	1	0	1	1	2	Striatin family
PF06165.8	1	0	0	1	1	0	0	1	1	2	Glycosyltransferase family 36
PF04457.9	1	0	1	1	1	0	0	0	1	2	Protein of unknown function (DUF504)
PF03583.11	0	1	3	2	3	2	0	1	3	2	Secretory lipase
PF06283.8	1	0	0	0	1	0	1	1	1	2	Trehalose utilisation
PF08883.8	1	0	1	1	2	0	1	2	2	2	Dopa 4,5-dioxygenase family
PF08287.8	0	0	1	1	1	0	0	1	1	2	Spc19
PF08639.7	0	0	1	1	1	1	0	0	1	2	DNA replication regulator SLD3
PF06792.8	0	0	1	0	1	1	0	1	1	2	Uncharacterised protein family (UPF0261)
PF02911.15	0	1	0	0	1	0	1	1	1	2	Formyl transferase, C-terminal domain
PF00041.18	0	0	0	1	1	0	1	1	1	2	Fibronectin type III domain
PF11468.5	0	0	1	0	1	1	0	1	1	2	Aromatic prenyltransferase Orf2
PF16205.2	0	0	1	1	1	0	0	1	1	2	Ribosomal_S17 N-terminal
PF08695.7	0	1	1	2	2	1	0	1	2	2	Cytochrome oxidase complex assembly protein 1
PF17167.1	1	0	0	1	1	0	0	1	1	2	Glycosyl hydrolase 36 superfamily, catalytic domain
PF11875.5	0	0	0	1	1	0	1	1	1	2	Domain of unknown function (DUF3395)
PF14447.3	3	2	1	2	4	2	2	0	4	2	Prokaryotic RING finger family 4
PF10444.6	0	0	1	1	1	1	0	0	1	2	Nbl1 / Borealin N terminal
PF16347.2	0	0	1	0	1	1	0	1	1	2	Domain of unknown function (DUF4976)
PF07962.9	0	0	1	1	1	1	0	0	1	2	Replication Fork Protection Component Swi3
PF10274.6	1	1	0	0	1	0	0	1	1	2	Parkin co-regulated protein
PF01394.17	0	0	0	1	1	1	0	1	1	2	Clathrin propeller repeat
PF13298.3	0	0	1	0	1	1	0	1	1	2	DNA polymerase Ligase (LigD)
PF01566.15	1	0	2	0	2	2	0	1	2	2	Natural resistance-associated macrophage protein
PF13620.3	0	0	0	0	1	0	1	2	1	2	Carboxypeptidase regulatory-like domain
PF04724.10	0	1	1	1	2	1	1	1	2	2	Glycosyltransferase family 17
PF13838.3	0	0	0	1	1	1	0	1	1	2	Clathrin-H-link
PF14461.3	2	0	0	1	1	0	0	0	1	2	Prokaryotic E2 family B
PF03718.10	0	0	1	0	1	1	0	1	1	2	Glycosyl hydrolase family 49
PF09747.6	0	0	0	1	1	1	0	1	1	2	Coiled-coil domain containing protein (DUF2052)
PF03992.13	1	0	1	1	2	2	0	1	2	2	Antibiotic biosynthesis monooxygenase
PF04402.11	0	0	1	0	1	1	0	1	1	2	Protein of unknown function (DUF541)
PF00545.17	1	0	0	1	1	0	0	1	1	2	ribonuclease
PF03647.10	0	1	2	0	2	2	0	1	2	2	Transmembrane proteins 14C
PF01756.16	0	0	1	0	1	1	0	1	1	2	Acyl-CoA oxidase
PF02810.12	0	0	1	0	1	1	0	1	1	2	SEC-C motif
PF00967.14	1	2	1	0	2	1	1	0	2	2	Barwin family
PF00394.19	8	5	9	17	16	9	13	17	23	1.95745	Multicopper oxidase
PF05199.10	8	25	38	24	26	37	25	46	56	1.95633	GMC oxidoreductase
PF01738.15	7	5	9	8	10	11	6	10	16	1.93939	Dienelactone hydrolase family
PF01633.17	3	3	4	3	4	5	4	3	7	1.93103	Choline/ethanolamine kinase
PF00075.21	2	2	5	1	2	6	3	4	6	1.92	RNase H
PF01231.15	3	3	3	4	3	3	2	4	6	1.92	Indoleamine 2,3-dioxygenase
PF00450.19	4	9	9	6	11	10	9	13	17	1.91549	Serine carboxypeptidase
PF13738.3	4	11	13	10	13	15	11	15	22	1.91304	Pyridine nucleotide-disulphide oxidoreductase
PF01565.20	13	26	36	37	41	41	36	55	68	1.90877	FAD binding domain
PF06966.9	5	5	4	5	6	4	5	8	10	1.90476	Protein of unknown function (DUF1295)
PF12146.5	12	16	21	28	25	25	17	24	40	1.90476	Serine aminopeptidase, S33
PF01735.15	0	3	3	2	4	3	2	4	5	1.90476	Lysophospholipase catalytic domain
PF03798.13	1	2	3	3	4	4	1	3	5	1.90476	TLC domain
PF14543.3	7	7	10	7	14	13	7	11	18	1.89474	Xylanase inhibitor N-terminal
PF05970.11	3	0	3	2	0	3	2	4	4	1.88235	PIF1-like helicase
PF13175.3	2	1	3	3	1	3	1	3	4	1.88235	AAA ATPase domain
PF07529.10	1	2	3	3	1	2	3	2	4	1.88235	HSA
PF08740.8	2	3	4	6	5	5	3	6	8	1.88235	BCS1 N terminal
PF05241.9	2	2	2	3	3	2	2	1	4	1.88235	Emopamil binding protein
PF07676.9	0	0	2	3	5	2	0	5	4	1.88235	WD40-like Beta Propeller Repeat
PF05834.9	0	3	7	4	4	8	2	2	7	1.86667	Lycopene cyclase protein
PF08493.7	0	1	3	1	1	3	1	3	3	1.84615	Aflatoxin regulatory protein
PF00644.17	1	1	2	2	2	2	1	2	3	1.84615	Poly(ADP-ribose) polymerase catalytic domain
PF06330.8	0	1	3	0	2	4	1	2	3	1.84615	Trichodiene synthase (TRI5)
PF07264.8	0	1	3	2	2	3	1	1	3	1.84615	Etoposide-induced protein 2.4 (EI24)
PF07021.9	1	2	0	4	2	1	0	3	3	1.84615	Methionine biosynthesis protein MetW
PF13302.4	4	6	12	6	13	8	5	11	15	1.84615	Acetyltransferase (GNAT) domain
PF01757.19	2	3	7	4	9	6	6	11	11	1.83333	Acyltransferase family
PF03211.10	1	2	2	1	1	2	6	7	5	1.81818	Pectate lyase
PF01612.17	2	1	4	4	3	4	2	2	5	1.81818	3'-5' exonuclease
PF08448.7	4	2	3	2	3	2	3	3	5	1.81818	PAS fold
PF00749.18	2	1	3	3	4	3	2	4	5	1.81818	tRNA synthetases class I (E and Q), catalytic domain
PF00067.19	31	104	137	130	122	161	125	172	223	1.8167	Cytochrome P450
PF00246.21	2	5	2	11	1	2	1	7	7	1.80645	Zinc carboxypeptidase
PF08450.9	2	5	5	5	5	5	5	8	9	1.8	SMP-30/Gluconolaconase/LRE-like region
PF01557.15	7	1	5	7	6	5	3	6	9	1.8	Fumarylacetoacetate (FAA) hydrolase family
PF02230.13	1	5	8	2	6	8	5	5	9	1.8	Phospholipase/Carboxylesterase
PF00295.14	1	1	15	3	21	16	8	15	18	1.8	Glycosyl hydrolases family 28
PF01846.16	1	0	2	2	0	2	0	2	2	1.77778	FF domain
PF00848.16	0	1	1	1	0	1	3	2	2	1.77778	Ring hydroxylating alpha subunit (catalytic domain)
PF00154.18	1	0	1	2	0	2	1	2	2	1.77778	recA bacterial DNA recombination protein
PF02816.15	1	2	0	2	0	0	2	2	2	1.77778	Alpha-kinase family
PF03928.11	0	1	2	1	0	2	1	2	2	1.77778	Haem-degrading
PF08669.8	0	1	1	2	1	1	1	2	2	1.77778	Glycine cleavage T-protein C-terminal barrel domain
PF02560.11	2	1	1	1	1	1	1	1	2	1.77778	Cyanate lyase C-terminal domain
PF02627.17	1	2	2	1	2	2	4	4	4	1.77778	Carboxymuconolactone decarboxylase family
PF02765.14	2	0	2	1	1	2	0	1	2	1.77778	Telomeric single stranded DNA binding POT1/CDC13
PF00733.18	1	3	2	3	2	3	2	2	4	1.77778	Asparagine synthase
PF12680.4	0	1	2	3	1	1	0	1	2	1.77778	SnoaL-like domain
PF13452.3	2	0	1	2	1	1	1	1	2	1.77778	N-terminal half of MaoC dehydratase
PF03486.11	3	1	9	6	5	9	4	8	10	1.77778	HI0933-like protein
PF02182.14	1	1	1	1	1	1	1	2	2	1.77778	SAD/SRA domain
PF04127.12	2	1	1	1	1	1	1	1	2	1.77778	DNA / pantothenate metabolism flavoprotein
PF03073.12	0	1	2	1	1	2	0	2	2	1.77778	TspO/MBR family
PF00305.16	1	1	1	1	1	1	1	2	2	1.77778	Lipoxygenase
PF03029.14	1	1	3	3	3	2	2	3	4	1.77778	Conserved hypothetical ATP binding protein
PF14498.3	0	1	2	1	2	2	0	1	2	1.77778	Glycosyl hydrolase family 65, N-terminal domain
PF14608.3	2	0	1	1	2	1	1	1	2	1.77778	RNA-binding, Nab2-type zinc finger
PF04124.9	0	0	2	1	2	2	0	2	2	1.77778	Dor1-like family
PF01988.16	1	0	2	1	2	2	0	1	2	1.77778	VIT family
PF00875.15	0	2	1	3	4	1	3	4	4	1.77778	DNA photolyase
PF02502.15	1	1	1	1	2	1	0	2	2	1.77778	Ribose/Galactose Isomerase
PF00881.21	1	1	1	1	2	1	1	1	2	1.77778	Nitroreductase family
PF13023.3	1	0	1	1	2	1	2	1	2	1.77778	HD domain
PF03441.11	0	2	1	3	4	1	3	4	4	1.77778	FAD binding domain of DNA photolyase
PF03547.15	1	0	1	2	2	2	0	1	2	1.77778	Membrane transport protein
PF08007.9	2	1	0	2	2	1	0	1	2	1.77778	Cupin superfamily protein
PF01532.17	6	3	9	9	9	9	5	9	13	1.76271	Glycosyl hydrolase family 47
PF01476.17	5	6	4	7	2	5	13	8	11	1.76	LysM domain
PF13640.3	6	7	7	5	8	7	5	5	11	1.76	2OG-Fe(II) oxygenase superfamily
PF02798.17	4	7	13	6	15	14	9	14	18	1.7561	Glutathione S-transferase, N-terminal domain
PF05922.13	3	4	1	6	2	2	6	8	7	1.75	Peptidase inhibitor I9
PF01070.15	6	6	8	10	7	8	9	10	14	1.75	FMN-dependent dehydrogenase
PF14497.3	5	7	10	6	8	11	7	10	14	1.75	Glutathione S-transferase, C-terminal domain
PF07976.9	1	2	6	3	5	6	4	5	7	1.75	Phenol hydroxylase, C-terminal dimerisation domain
PF00293.25	9	10	13	13	13	16	12	15	22	1.74257	NUDIX domain
PF05630.8	1	1	3	5	1	3	3	6	5	1.73913	Necrosis inducing protein (NPP1)
PF11735.5	2	1	4	4	3	5	1	3	5	1.73913	Cryptococcal mannosyltransferase 1
PF06912.8	0	1	4	2	5	4	3	4	5	1.73913	Protein of unknown function (DUF1275)
PF00109.23	10	19	37	33	39	41	31	35	53	1.73061	Beta-ketoacyl synthase, N-terminal domain
PF02801.19	10	18	36	32	38	41	28	33	51	1.72881	Beta-ketoacyl synthase, C-terminal domain
PF02225.19	2	6	5	12	3	5	9	14	12	1.71429	PA domain
PF00580.18	2	0	2	1	1	4	3	1	3	1.71429	UvrD/REP helicase N-terminal domain
PF01263.17	3	2	4	4	2	4	4	5	6	1.71429	Aldose 1-epimerase
PF08423.8	2	1	2	2	1	3	1	2	3	1.71429	Rad51
PF01068.18	3	3	4	4	4	4	3	3	6	1.71429	ATP dependent DNA ligase domain
PF13522.3	4	1	4	5	4	4	2	4	6	1.71429	Glutamine amidotransferase domain
PF14378.3	1	1	2	1	2	2	2	3	3	1.71429	PAP2 superfamily
PF05648.11	3	0	2	2	2	2	1	2	3	1.71429	Peroxisomal biogenesis factor 11 (PEX11)
PF01205.16	2	1	2	2	2	3	0	2	3	1.71429	Uncharacterized protein family UPF0029
PF03061.19	4	3	7	8	6	6	3	5	9	1.71429	Thioesterase superfamily
PF01761.17	1	1	2	2	2	1	3	2	3	1.71429	3-dehydroquinate synthase
PF10075.6	2	0	2	2	2	2	2	2	3	1.71429	CSN8/PSMD8/EIF3K family
PF01222.14	3	3	3	4	4	3	3	5	6	1.71429	Ergosterol biosynthesis ERG4/ERG24 family
PF00994.21	3	2	2	2	2	2	0	1	3	1.71429	Probable molybdopterin binding domain
PF08386.7	0	2	4	5	4	5	3	5	6	1.71429	TAP-like protein
PF01406.16	1	0	2	2	2	2	2	3	3	1.71429	tRNA synthetases class I (C) catalytic domain
PF03537.10	1	0	3	1	2	3	1	3	3	1.71429	Glycoside-hydrolase family GH114
PF02837.15	1	1	4	6	5	3	3	5	6	1.71429	Glycosyl hydrolases family 2, sugar binding domain
PF13671.3	1	1	5	5	5	4	2	5	6	1.71429	AAA domain
PF12821.4	0	1	2	1	3	3	2	2	3	1.71429	Threonine/Serine exporter, ThrE
PF00814.22	2	1	2	2	3	2	1	1	3	1.71429	Glycoprotease family
PF14479.3	4	0	1	3	3	1	1	1	3	1.71429	Prion-inhibition and propagation
PF13673.4	14	13	21	21	26	19	14	22	32	1.70667	Acetyltransferase (GNAT) domain
PF13604.3	9	2	8	5	0	8	5	10	10	1.70213	AAA domain
PF10340.6	3	3	4	3	6	3	5	6	7	1.69697	Protein of unknown function (DUF2424)
PF00135.25	12	22	26	28	41	32	35	36	49	1.68966	Carboxylesterase family
PF14765.3	7	17	32	27	31	36	22	32	43	1.68627	Polyketide synthase dehydratase
PF01909.20	2	3	2	3	1	3	2	3	4	1.68421	Nucleotidyltransferase domain
PF16916.2	3	1	2	2	3	2	3	3	4	1.68421	Dimerisation domain of Zinc Transporter
PF13668.3	2	2	2	2	3	2	2	4	4	1.68421	Ferritin-like domain
PF08542.8	1	2	3	3	3	3	1	3	4	1.68421	Replication factor C C-terminal domain
PF05935.8	0	3	8	0	9	9	4	5	8	1.68421	Arylsulfotransferase (ASST)
PF08643.7	1	1	2	2	5	4	2	2	4	1.68421	Fungal family of unknown function (DUF1776)
PF14686.3	1	3	4	1	2	4	3	6	5	1.66667	Polysaccharide lyase family 4, domain II
PF11578.5	0	1	2	4	5	2	6	4	5	1.66667	Protein of unknown function (DUF3237)
PF16073.2	1	5	10	4	8	11	8	6	11	1.66038	Starter unit:ACP transacylase in aflatoxin biosynthesis
PF00092.25	5	3	4	5	3	4	2	3	6	1.65517	von Willebrand factor type A domain
PF13434.3	7	11	19	13	19	18	14	15	24	1.65517	L-lysine 6-monooxygenase (NADPH-requiring)
PF01494.16	16	35	68	37	62	66	42	51	78	1.65517	FAD binding domain
PF01095.16	2	1	6	1	5	6	2	6	6	1.65517	Pectinesterase
PF01670.13	2	2	5	3	5	5	2	5	6	1.65517	Glycosyl hydrolase family 12
PF01645.14	4	2	3	6	6	3	1	4	6	1.65517	Conserved region in glutamate synthase
PF13417.3	4	10	18	6	18	15	11	15	20	1.64948	Glutathione S-transferase, N-terminal domain
PF00698.18	10	18	36	34	36	40	25	34	48	1.64807	Acyl transferase domain
PF01344.22	4	4	5	9	2	5	3	7	8	1.64103	Kelch motif
PF04193.11	4	4	8	6	8	8	8	8	11	1.62963	PQ loop repeat
PF13409.3	4	10	13	6	14	12	12	13	17	1.61905	Glutathione S-transferase, N-terminal domain
PF06609.10	14	22	35	18	43	40	26	30	46	1.61404	Fungal trichothecene efflux pump (TRI12)
PF01370.18	23	23	61	47	65	65	43	62	78	1.60411	NAD dependent epimerase/dehydratase family
PF09243.7	0	0	1	1	0	1	1	1	1	1.6	Mitochondrial small ribosomal subunit Rsm22
PF14304.3	0	0	1	1	0	1	1	1	1	1.6	Transcription termination and cleavage factor C-terminal
PF03813.11	1	0	1	1	0	1	1	0	1	1.6	Nrap protein
PF08558.7	1	0	1	1	0	1	0	1	1	1.6	Telomere repeat binding factor (TRF)
PF06825.9	1	1	1	1	0	1	0	0	1	1.6	Heat shock factor binding protein 1
PF13878.3	1	0	1	1	0	1	0	1	1	1.6	zinc-finger of acetyl-transferase ESCO
PF03941.12	0	1	1	1	0	1	0	1	1	1.6	Inner centromere protein, ARK binding region
PF01329.16	0	1	1	1	0	1	0	1	1	1.6	Pterin 4 alpha carbinolamine dehydratase
PF14327.3	0	0	1	1	0	1	1	1	1	1.6	Hinge domain of cleavage stimulation factor subunit 2
PF09368.7	1	0	1	1	0	1	0	1	1	1.6	Sas10 C-terminal domain
PF12090.5	1	1	1	1	0	1	0	0	1	1.6	Spt20 family
PF03715.10	0	0	1	1	0	1	1	1	1	1.6	Noc2p family
PF12701.4	1	0	1	1	0	1	0	1	1	1.6	Scd6-like Sm domain
PF08914.8	1	0	1	1	0	1	1	0	1	1.6	Rap1 Myb domain
PF00568.20	0	1	1	1	0	1	1	0	1	1.6	WH1 domain
PF08123.10	0	1	1	1	0	1	0	1	1	1.6	Histone methylation protein DOT1
PF10377.6	1	0	1	1	0	1	0	1	1	1.6	Autophagy-related protein 11
PF09427.7	1	0	1	1	0	1	0	1	1	1.6	Domain of unknown function (DUF2014)
PF04478.9	0	1	1	1	0	1	0	1	1	1.6	Mid2 like cell wall stress sensor
PF05743.10	1	1	1	1	0	1	0	0	1	1.6	UEV domain
PF10018.6	0	0	1	1	0	1	1	1	1	1.6	Vitamin-D-receptor interacting Mediator subunit 4
PF05064.10	0	0	1	1	0	1	1	1	1	1.6	Nsp1-like C-terminal region
PF13304.3	1	0	1	1	0	1	0	1	1	1.6	AAA domain, putative AbiEii toxin, Type IV TA system
PF08580.7	0	0	1	1	0	1	1	1	1	1.6	Yeast cortical protein KAR9
PF15477.3	1	0	1	1	0	1	0	1	1	1.6	Small acidic protein family
PF06644.8	0	0	1	1	0	1	1	1	1	1.6	ATP11 protein
PF08284.8	0	0	0	2	0	1	1	1	1	1.6	Retroviral aspartyl protease
PF05022.9	1	0	1	1	0	1	0	1	1	1.6	SRP40, C-terminal domain
PF10382.6	0	0	1	1	0	1	1	1	1	1.6	Protein of unknown function (DUF2439)
PF10680.6	0	1	1	1	0	1	1	0	1	1.6	RNA polymerase I specific transcription initiation factor
PF07683.11	0	0	1	2	0	0	1	1	1	1.6	Cobalamin synthesis protein cobW C-terminal domain
PF04050.11	1	0	1	1	0	1	0	1	1	1.6	Up-frameshift suppressor 2
PF00830.16	0	0	1	1	0	2	0	1	1	1.6	Ribosomal L28 family
PF15906.2	0	1	1	0	0	1	1	1	1	1.6	Zinc-finger of nitric oxide synthase-interacting protein
PF12329.5	0	0	1	1	0	1	1	1	1	1.6	TATA element modulatory factor 1 DNA binding
PF13975.3	0	0	0	2	0	1	1	1	1	1.6	gag-polyprotein putative aspartyl protease
PF06464.8	1	0	1	1	0	1	0	1	1	1.6	DMAP1-binding Domain
PF07757.10	0	2	2	1	1	1	2	1	2	1.6	Predicted AdoMet-dependent methyltransferase
PF00930.18	0	0	1	3	1	1	2	2	2	1.6	Dipeptidyl peptidase IV (DPP IV) N-terminal region
PF09084.8	3	0	0	1	1	0	2	3	2	1.6	NMT1/THI5 like
PF00652.19	0	1	2	1	1	1	2	2	2	1.6	Ricin-type beta-trefoil lectin domain
PF06071.10	0	1	1	1	1	2	2	2	2	1.6	Protein of unknown function (DUF933)
PF02872.15	1	2	1	2	1	1	1	1	2	1.6	5'-nucleotidase, C-terminal domain
PF03460.14	1	1	1	2	1	1	1	2	2	1.6	Nitrite/Sulfite reductase ferredoxin-like half domain
PF03737.12	2	0	2	1	1	2	1	1	2	1.6	Demethylmenaquinone methyltransferase
PF03306.10	1	2	1	1	1	1	0	3	2	1.6	Alpha-acetolactate decarboxylase
PF01077.19	1	1	1	2	1	1	1	2	2	1.6	Nitrite and sulphite reductase 4Fe-4S domain
PF01124.15	5	2	3	1	2	3	2	2	4	1.6	MAPEG family
PF06052.9	0	0	2	1	1	3	0	3	2	1.6	3-hydroxyanthranilic acid dioxygenase
PF01210.20	0	1	1	3	1	1	1	2	2	1.6	NAD-dependent glycerol-3-phosphate dehydrogenase N-terminus
PF13249.3	1	0	2	2	1	2	0	2	2	1.6	Squalene-hopene cyclase N-terminal domain
PF05577.9	3	0	3	6	3	3	3	4	5	1.6	Serine carboxypeptidase S28
PF13415.3	4	5	6	7	5	6	3	4	8	1.6	Galactose oxidase, central domain
PF10367.6	2	2	2	2	2	2	1	2	3	1.6	Vacuolar sorting protein 39 domain 2
PF13656.3	3	2	2	2	2	2	0	2	3	1.6	RNA polymerase Rpb3/Rpb11 dimerisation domain
PF07745.10	0	2	2	1	2	2	2	4	3	1.6	Glycosyl hydrolase family 53
PF13238.3	2	2	5	2	4	5	4	6	6	1.6	AAA domain
PF13840.3	2	2	2	2	2	3	0	2	3	1.6	ACT domain
PF01459.19	2	2	1	2	2	2	2	2	3	1.6	Eukaryotic porin
PF08547.9	0	3	2	2	2	2	1	3	3	1.6	Complex I intermediate-associated protein 30 (CIA30)
PF02836.14	2	2	5	6	5	5	2	8	7	1.6	Glycosyl hydrolases family 2, TIM barrel domain
PF13344.3	4	3	5	4	5	5	4	5	7	1.6	Haloacid dehalogenase-like hydrolase
PF00128.21	6	7	10	9	11	10	7	15	15	1.6	Alpha amylase, catalytic domain
PF00459.22	3	2	4	3	4	4	1	4	5	1.6	Inositol monophosphatase family
PF16113.2	6	8	9	8	12	8	7	12	14	1.6	Enoyl-CoA hydratase/isomerase
PF07883.8	4	9	11	9	13	12	6	11	15	1.6	Cupin domain
PF11327.5	1	6	4	8	8	4	5	9	9	1.6	Protein of unknown function (DUF3129)
PF10186.6	0	1	1	2	2	2	1	1	2	1.6	Vacuolar sorting 38 and autophagy-related subunit 14
PF15901.2	0	0	1	1	1	1	0	1	1	1.6	Sortilin, neurotensin receptor 3, C-terminal
PF04178.9	0	1	2	2	2	2	0	1	2	1.6	Got1/Sft2-like family
PF09070.8	0	0	1	1	1	1	0	1	1	1.6	PFU (PLAA family ubiquitin binding)
PF09337.7	0	0	1	1	1	1	0	1	1	1.6	His(2)-Cys(2) zinc finger
PF05625.8	0	1	1	1	1	1	0	0	1	1.6	PAXNEB protein
PF07934.9	0	0	1	1	1	1	0	1	1	1.6	8-oxoguanine DNA glycosylase, N-terminal domain
PF01411.16	0	0	2	1	2	2	1	2	2	1.6	tRNA synthetases class II (A)
PF12584.5	1	0	1	1	1	0	0	1	1	1.6	Trafficking protein particle complex subunit 10, TRAPPC10
PF06127.8	0	0	1	1	1	1	0	1	1	1.6	Protein of unknown function (DUF962)
PF08029.8	0	0	1	1	1	1	0	1	1	1.6	HisG, C-terminal domain
PF08069.9	0	0	1	1	1	1	0	1	1	1.6	Ribosomal S13/S15 N-terminal domain
PF03540.10	0	0	1	1	1	1	0	1	1	1.6	Transcription initiation factor TFIID 23-30kDa subunit
PF15577.3	0	0	1	1	1	1	0	1	1	1.6	Spc7_C2
PF03417.13	0	0	1	0	1	1	1	1	1	1.6	Acyl-coenzyme A:6-aminopenicillanic acid acyl-transferase
PF12853.4	0	0	1	1	1	1	0	1	1	1.6	C-terminal of NADH-ubiquinone oxidoreductase 21 kDa subunit
PF13821.3	0	0	2	2	2	2	0	2	2	1.6	Domain of unknown function (DUF4187)
PF13323.3	0	0	1	1	1	1	0	1	1	1.6	N-terminal domain with HPIH motif
PF09745.6	0	0	1	1	1	1	0	1	1	1.6	Coiled-coil domain-containing protein 55 (DUF2040)
PF16503.2	1	0	1	1	1	1	0	0	1	1.6	Zinc-ribbon
PF08561.7	0	0	1	1	1	1	0	1	1	1.6	Mitochondrial ribosomal protein L37
PF07080.8	0	1	1	1	1	0	0	1	1	1.6	Protein of unknown function (DUF1348)
PF03911.13	0	0	1	1	1	1	1	0	1	1.6	Sec61beta family
PF10232.6	0	0	1	1	1	1	0	1	1	1.6	Mediator of RNA polymerase II transcription complex subunit 8
PF06726.9	0	0	1	1	1	1	0	1	1	1.6	Bladder cancer-related protein BC10
PF03371.12	0	0	1	1	1	1	0	1	1	1.6	PRP38 family
PF08211.9	0	0	1	1	1	1	0	1	1	1.6	Cytidine and deoxycytidylate deaminase zinc-binding region
PF09340.7	0	0	1	1	1	1	0	1	1	1.6	Histone acetyltransferase subunit NuA4
PF09173.8	0	0	1	1	1	1	0	1	1	1.6	Initiation factor eIF2 gamma, C terminal
PF05768.11	1	0	1	1	1	1	0	0	1	1.6	Glutaredoxin-like domain (DUF836)
PF02410.12	0	0	1	1	1	1	0	1	1	1.6	Ribosomal silencing factor during starvation
PF04959.10	0	0	1	1	1	1	0	1	1	1.6	Arsenite-resistance protein 2
PF14523.3	0	0	1	1	1	1	0	1	1	1.6	Syntaxin-like protein
PF02464.14	0	1	1	0	1	1	0	1	1	1.6	Competence-damaged protein
PF05160.10	0	0	1	1	1	1	0	1	1	1.6	DSS1/SEM1 family
PF04148.10	0	0	1	1	1	1	0	1	1	1.6	Transmembrane adaptor Erv26
PF10644.6	1	2	1	1	2	2	0	1	2	1.6	Misato Segment II tubulin-like domain
PF00940.16	0	0	1	1	1	1	0	1	1	1.6	DNA-dependent RNA polymerase
PF02152.15	0	0	1	1	1	1	0	1	1	1.6	Dihydroneopterin aldolase
PF03315.12	0	1	1	0	1	1	0	1	1	1.6	Serine dehydratase beta chain
PF04750.11	0	0	1	2	1	1	0	0	1	1.6	FAR-17a/AIG1-like protein
PF11701.5	0	0	1	1	1	1	0	1	1	1.6	Myosin-binding striated muscle assembly central
PF05180.9	0	0	1	1	1	1	0	1	1	1.6	DNL zinc finger
PF14700.3	0	0	1	1	1	1	0	1	1	1.6	DNA-directed RNA polymerase N-terminal
PF14616.3	0	1	1	1	1	1	0	0	1	1.6	Domain of unknown function (DUF4451)
PF14702.3	0	0	1	1	1	1	0	1	1	1.6	Central domain of human glycogen debranching enzyme
PF02109.13	1	0	1	1	1	0	0	1	1	1.6	DAD family
PF09807.6	0	1	1	1	1	0	0	1	1	1.6	Elongation complex protein 6
PF13001.4	0	0	1	1	1	1	0	1	1	1.6	Proteasome stabiliser
PF08457.7	1	0	1	1	1	0	0	1	1	1.6	Sfi1 spindle body protein
PF13579.3	2	1	2	2	3	2	0	3	3	1.6	Glycosyl transferase 4-like domain
PF01680.14	0	0	1	1	1	1	0	1	1	1.6	SOR/SNZ family
PF01937.16	1	0	1	1	1	0	0	1	1	1.6	Protein of unknown function DUF89
PF12627.4	0	1	1	1	1	1	0	0	1	1.6	Probable RNA and SrmB- binding site of polymerase A
PF01018.19	0	0	1	1	1	1	0	1	1	1.6	GTP1/OBG
PF07047.9	0	0	1	1	1	1	0	1	1	1.6	Optic atrophy 3 protein (OPA3)
PF14699.3	0	0	1	1	1	1	0	1	1	1.6	N-terminal domain from the human glycogen debranching enzyme
PF04597.11	0	0	1	1	1	1	0	1	1	1.6	Ribophorin I
PF12411.5	0	0	1	1	1	1	0	1	1	1.6	Choline sulfatase enzyme C terminal
PF03576.11	0	0	1	1	1	1	0	1	1	1.6	Peptidase family S58
PF00368.15	0	0	1	1	1	1	0	1	1	1.6	Hydroxymethylglutaryl-coenzyme A reductase
PF05786.11	0	0	1	1	1	1	0	1	1	1.6	Condensin complex subunit 2
PF08552.8	0	1	1	0	1	1	0	1	1	1.6	Inositolphosphorylceramide synthase subunit Kei1
PF03332.10	0	1	2	1	2	2	0	2	2	1.6	Eukaryotic phosphomannomutase
PF05664.8	0	0	1	1	1	1	0	1	1	1.6	Plant family of unknown function (DUF810)
PF05328.9	0	0	1	1	1	1	0	1	1	1.6	CybS, succinate dehydrogenase cytochrome B small subunit
PF05704.9	0	0	1	1	2	1	3	2	2	1.6	Capsular polysaccharide synthesis protein
PF10058.6	0	0	1	1	1	1	0	1	1	1.6	Predicted integral membrane zinc-ribbon metal-binding protein
PF02449.12	0	1	2	1	2	2	1	1	2	1.6	Beta-galactosidase
PF14749.3	0	0	1	0	1	1	1	1	1	1.6	Acyl-coenzyme A oxidase N-terminal
PF10214.6	0	1	1	1	1	1	0	0	1	1.6	RNA polymerase I-specific transcription-initiation factor
PF07808.10	0	0	1	0	1	1	1	1	1	1.6	RED-like protein N-terminal region
PF02272.16	0	0	1	1	1	2	0	0	1	1.6	DHHA1 domain
PF09785.6	0	0	1	1	1	1	0	1	1	1.6	Prp31 C terminal domain
PF16714.2	0	0	1	1	1	1	0	1	1	1.6	Tyrosyl-tRNA synthetase C-terminal domain
PF06883.9	0	0	1	1	1	1	0	1	1	1.6	RNA polymerase I, Rpa2 specific domain
PF13439.3	2	1	2	2	3	2	0	3	3	1.6	Glycosyltransferase Family 4
PF17189.1	0	1	2	1	2	2	0	2	2	1.6	Glycosyl hydrolase family 30 beta sandwich domain
PF16697.2	0	0	1	0	1	1	1	1	1	1.6	Inner membrane component of T3SS, cytoplasmic domain
PF02167.12	0	0	1	1	1	1	0	1	1	1.6	Cytochrome C1 family
PF06391.10	0	0	1	1	1	1	0	1	1	1.6	CDK-activating kinase assembly factor MAT1
PF07228.9	0	0	1	1	1	1	0	1	1	1.6	Stage II sporulation protein E (SpoIIE)
PF04135.9	1	0	1	1	1	1	0	0	1	1.6	Nucleolar RNA-binding protein, Nop10p family
PF01634.15	0	0	1	1	1	1	0	1	1	1.6	ATP phosphoribosyltransferase
PF02317.14	0	0	0	2	1	0	1	1	1	1.6	NAD/NADP octopine/nopaline dehydrogenase, alpha-helical domain
PF11640.5	1	0	1	1	1	1	0	0	1	1.6	Telomere-length maintenance and DNA damage repair
PF16186.2	1	0	1	0	1	1	0	1	1	1.6	Atypical Arm repeat
PF03313.12	0	1	1	0	1	1	0	1	1	1.6	Serine dehydratase alpha chain
PF04752.9	0	0	1	1	1	1	0	1	1	1.6	ChaC-like protein
PF04718.12	0	0	1	1	1	1	0	1	1	1.6	Mitochondrial ATP synthase g subunit
PF02747.12	0	0	1	1	1	1	0	1	1	1.6	Proliferating cell nuclear antigen, C-terminal domain
PF12832.4	0	0	1	1	1	1	1	0	1	1.6	MFS_1 like family
PF08774.8	0	0	1	1	1	1	0	1	1	1.6	VRR-NUC domain
PF12353.5	0	0	1	1	1	1	0	1	1	1.6	Eukaryotic translation initiation factor 3 subunit G
PF01165.17	0	0	1	1	1	1	1	0	1	1.6	Ribosomal protein S21
PF04118.11	1	0	1	1	1	1	0	0	1	1.6	Dopey, N-terminal
PF06911.9	0	0	1	1	1	1	0	1	1	1.6	Senescence-associated protein
PF01902.14	0	0	1	1	1	1	0	1	1	1.6	Diphthamide synthase
PF15924.2	0	0	1	1	1	1	0	1	1	1.6	ALG11 mannosyltransferase N-terminus
PF15402.3	0	0	1	1	1	1	0	1	1	1.6	N-terminus of kinetochore NMS complex subunit Spc7
PF14815.3	1	0	1	0	1	1	1	0	1	1.6	NUDIX domain
PF11416.5	0	0	1	1	1	0	1	1	1	1.6	Syntaxin-5 N-terminal, Sly1p-binding domain
PF12451.5	0	0	1	1	1	1	0	1	1	1.6	Vacuolar protein sorting protein 11 C terminal
PF09791.6	1	0	1	1	1	1	0	0	1	1.6	Oxidoreductase-like protein, N-terminal
PF14520.3	0	0	1	0	1	2	0	1	1	1.6	Helix-hairpin-helix domain
PF10193.6	0	0	1	1	1	1	0	1	1	1.6	Telomere length regulation protein
PF00705.15	0	0	1	1	1	1	0	1	1	1.6	Proliferating cell nuclear antigen, N-terminal domain
PF10528.6	0	0	1	1	1	1	1	0	1	1.6	GLEYA domain
PF07539.9	0	0	1	1	1	1	0	1	1	1.6	Down-regulated in metastasis
PF01749.17	1	0	1	0	1	1	0	1	1	1.6	Importin beta binding domain
PF04095.13	0	0	1	1	1	1	0	1	1	1.6	Nicotinate phosphoribosyltransferase (NAPRTase) family
PF06042.8	0	1	1	0	1	1	0	1	1	1.6	Nucleotidyltransferase
PF12589.5	0	0	1	1	1	1	0	1	1	1.6	Methyltransferase involved in Williams-Beuren syndrome
PF17121.2	0	0	1	1	1	1	0	1	1	1.6	Zinc finger, C3HC4 type (RING finger)
PF01812.17	0	1	2	1	2	2	1	1	2	1.6	5-formyltetrahydrofolate cyclo-ligase family
PF02879.13	0	0	1	1	1	1	0	1	1	1.6	Phosphoglucomutase/phosphomannomutase, alpha/beta/alpha domain II
PF07983.10	1	0	1	2	2	1	1	2	2	1.6	X8 domain
PF16761.2	0	1	1	0	1	1	1	0	1	1.6	Transcription-silencing protein, cryptic loci regulator Clr2
PF05690.11	0	0	1	1	1	1	0	1	1	1.6	Thiazole biosynthesis protein ThiG
PF01280.17	1	1	0	1	1	1	0	0	1	1.6	Ribosomal protein L19e
PF00885.16	0	0	1	1	1	1	0	1	1	1.6	6,7-dimethyl-8-ribityllumazine synthase
PF01470.14	0	0	0	1	1	1	1	1	1	1.6	Pyroglutamyl peptidase
PF04990.9	0	0	1	1	1	1	0	1	1	1.6	RNA polymerase Rpb1, domain 7
PF05960.8	0	0	1	0	1	1	1	1	1	1.6	Bacterial protein of unknown function (DUF885)
PF00366.17	1	0	2	2	2	1	0	2	2	1.6	Ribosomal protein S17
PF00731.17	0	0	1	1	1	1	0	1	1	1.6	AIR carboxylase
PF14570.3	1	0	0	1	1	0	1	1	1	1.6	RING/Ubox like zinc-binding domain
PF10333.6	0	1	1	1	1	0	1	0	1	1.6	GPI-Mannosyltransferase II co-activator
PF08221.8	1	0	1	0	1	1	0	1	1	1.6	RNA polymerase III subunit RPC82 helix-turn-helix domain
PF11997.5	0	0	1	0	1	1	1	1	1	1.6	Domain of unknown function (DUF3492)
PF15469.3	0	0	1	1	1	1	0	1	1	1.6	Exocyst complex component Sec5
PF10032.6	0	0	1	1	1	1	0	1	1	1.6	Phosphate transport (Pho88)
PF08549.7	0	0	1	1	1	1	0	1	1	1.6	Fungal domain of unknown function (DUF1750)
PF12716.4	0	0	1	1	1	1	0	1	1	1.6	Nuclear pore assembly and biogenesis
PF08641.9	1	0	0	1	1	1	0	1	1	1.6	Kinetochore protein Mis14 like
PF07855.9	0	1	0	1	1	1	0	1	1	1.6	Protein of unknown function (DUF1649)
PF00203.18	0	0	2	2	2	2	0	2	2	1.6	Ribosomal protein S19
PF12066.5	0	0	1	1	1	1	0	1	1	1.6	Domain of unknown function (DUF3546)
PF12689.4	0	0	1	1	1	1	0	1	1	1.6	Acid Phosphatase
PF14671.3	0	0	1	1	1	1	0	1	1	1.6	Dual specificity protein phosphatase, N-terminal half
PF04227.9	0	0	1	1	1	1	0	1	1	1.6	Indigoidine synthase A like protein
PF10540.6	0	0	1	1	1	1	0	1	1	1.6	Munc13 (mammalian uncoordinated) homology domain
PF11326.5	0	1	0	1	1	1	0	1	1	1.6	Protein of unknown function (DUF3128)
PF13899.3	0	1	2	1	2	2	0	2	2	1.6	Thioredoxin-like
PF07978.10	0	0	1	1	1	1	0	1	1	1.6	NIPSNAP
PF13758.3	0	0	1	1	1	1	0	1	1	1.6	Prefoldin subunit
PF10224.6	0	0	1	1	1	1	1	0	1	1.6	Predicted coiled-coil protein (DUF2205)
PF04992.11	0	0	1	1	1	1	0	1	1	1.6	RNA polymerase Rpb1, domain 6
PF10780.6	0	0	1	1	1	1	0	1	1	1.6	39S ribosomal protein L53/MRP-L53
PF02186.12	0	0	1	1	1	1	0	1	1	1.6	TFIIE beta subunit core domain
PF05181.9	0	0	1	1	1	1	0	1	1	1.6	XPA protein C-terminus
PF11960.5	1	0	0	1	1	0	1	1	1	1.6	Domain of unknown function (DUF3474)
PF05652.9	0	1	1	0	1	1	0	1	1	1.6	Scavenger mRNA decapping enzyme (DcpS) N-terminal
PF16381.2	0	1	0	1	1	1	0	1	1	1.6	Coatomer subunit gamma-1 C-terminal appendage platform
PF14701.3	0	0	1	1	1	1	0	1	1	1.6	Glucanotransferase of human glycogen debranching enzyme
PF10247.6	0	0	1	1	1	1	0	1	1	1.6	Reactive mitochondrial oxygen species modulator 1
PF02184.13	0	0	1	1	1	1	0	1	1	1.6	HAT (Half-A-TPR) repeat
PF09446.7	1	0	0	1	1	1	0	1	1	1.6	VMA21-like domain
PF08171.8	2	0	1	0	1	1	0	0	1	1.6	Mad3/BUB1 homology region 2
PF01743.17	0	1	1	1	1	1	0	0	1	1.6	Poly A polymerase head domain
PF00886.16	0	0	1	1	1	1	0	1	1	1.6	Ribosomal protein S16
PF04406.11	1	0	1	0	1	1	0	1	1	1.6	Type IIB DNA topoisomerase
PF03227.13	0	1	1	0	1	1	0	1	1	1.6	Gamma interferon inducible lysosomal thiol reductase (GILT)
PF04152.11	0	0	1	1	1	1	0	1	1	1.6	Mre11 DNA-binding presumed domain
PF08317.8	0	0	1	1	1	1	0	1	1	1.6	Spc7 kinetochore protein
PF09763.6	2	0	1	1	2	1	1	2	2	1.6	Exocyst complex component Sec3
PF13915.3	0	0	1	1	1	1	1	0	1	1.6	Domain of unknown function (DUF4210)
PF00346.16	0	0	1	1	1	1	0	1	1	1.6	Respiratory-chain NADH dehydrogenase, 49 Kd subunit
PF11526.5	0	1	1	1	1	1	0	0	1	1.6	Subunit of cleavage factor IA Pcf11
PF08610.7	0	0	1	1	1	1	0	1	1	1.6	Peroxisomal membrane protein (Pex16)
PF12927.4	0	0	1	1	1	1	0	1	1	1.6	Domain of unknown function (DUF3835)
PF05958.8	0	0	1	1	1	1	0	1	1	1.6	tRNA (Uracil-5-)-methyltransferase
PF07247.9	1	0	2	2	2	1	0	2	2	1.6	Alcohol acetyltransferase
PF11913.5	1	0	1	1	1	0	0	1	1	1.6	Protein of unknown function (DUF3431)
PF05345.9	1	0	1	0	1	1	1	0	1	1.6	Putative Ig domain
PF14269.3	0	3	9	1	9	9	4	5	8	1.6	Arylsulfotransferase (ASST)
PF03972.11	0	2	2	1	4	2	1	3	3	1.6	MmgE/PrpD family
PF05875.9	0	0	2	1	3	2	1	1	2	1.6	Ceramidase
PF07993.9	11	12	28	19	33	31	19	38	38	1.59162	Male sterility protein
PF16197.2	4	14	23	22	25	27	18	23	31	1.58974	Ketoacyl-synthetase C-terminal extension
PF04389.14	6	7	10	16	10	10	15	22	19	1.58333	Peptidase family M28
PF07690.13	113	181	296	244	316	296	228	330	394	1.57285	Major Facilitator Superfamily
PF06293.11	3	5	7	8	9	6	6	7	10	1.56863	Lipopolysaccharide kinase (Kdo/WaaP) family
PF00578.18	3	6	7	5	10	7	3	5	9	1.56522	AhpC/TSA family
PF00550.22	11	21	45	36	45	56	35	53	59	1.56291	Phosphopantetheine attachment site
PF00561.17	14	26	44	43	45	47	30	48	58	1.56229	alpha/beta hydrolase fold
PF00535.23	4	5	8	4	5	6	4	5	8	1.56098	Glycosyl transferase family 2
PF02770.16	6	5	10	8	13	10	8	12	14	1.55556	Acyl-CoA dehydrogenase, middle domain
PF00704.25	9	7	16	15	10	17	13	16	20	1.5534	Glycosyl hydrolases family 18
PF04072.11	2	2	7	4	4	7	4	1	6	1.54839	Leucine carboxyl methyltransferase
PF16884.2	2	1	5	3	5	5	4	6	6	1.54839	N-terminal domain of oxidoreductase
PF00583.22	22	22	33	27	39	33	18	34	44	1.54386	Acetyltransferase (GNAT) family
PF08323.8	1	3	5	1	2	5	4	5	5	1.53846	Starch synthase catalytic domain
PF14310.3	6	11	16	15	15	16	10	15	20	1.53846	Fibronectin type III-like domain
PF13537.3	3	2	4	4	4	4	2	3	5	1.53846	Glutamine amidotransferase domain
PF00150.15	4	12	11	12	16	11	16	22	20	1.53846	Cellulase (glycosyl hydrolase family 5)
PF00462.21	4	0	5	4	4	4	1	4	5	1.53846	Glutaredoxin
PF00378.17	6	9	10	8	13	9	10	13	15	1.53846	Enoyl-CoA hydratase/isomerase
PF12505.5	3	3	3	3	5	3	2	4	5	1.53846	Protein of unknown function (DUF3712)
PF00441.21	7	5	10	8	14	10	7	12	14	1.53425	Acyl-CoA dehydrogenase, C-terminal domain
PF13374.3	3	7	5	6	11	4	5	6	9	1.53191	Tetratricopeptide repeat
PF00326.18	7	7	7	14	11	5	7	10	13	1.52941	Prolyl oligopeptidase family
PF02771.13	7	5	9	8	12	9	7	11	13	1.52941	Acyl-CoA dehydrogenase, N-terminal domain
PF13086.3	10	3	11	8	5	9	9	8	12	1.52381	AAA domain
PF04679.12	2	2	3	3	3	3	2	3	4	1.52381	ATP dependent DNA ligase C terminal region
PF16177.2	3	2	3	4	3	3	0	3	4	1.52381	Acetyl-coenzyme A synthetase N-terminus
PF08662.8	2	1	3	3	3	3	3	3	4	1.52381	Eukaryotic translation initiation factor eIF2A
PF08449.8	3	2	3	2	3	3	1	4	4	1.52381	UAA transporter family
PF01472.17	2	3	3	3	3	3	1	3	4	1.52381	PUA domain
PF02913.16	2	5	7	3	7	7	4	7	8	1.52381	FAD linked oxidases, C-terminal domain
PF16483.2	2	2	4	2	4	4	1	2	4	1.52381	Beta-1,3-glucanase
PF12697.4	20	29	48	49	49	52	35	55	64	1.51929	Alpha/beta hydrolase family
PF13242.3	8	4	8	7	10	9	4	8	11	1.51724	HAD-hyrolase-like
PF00248.18	15	23	33	23	44	32	28	45	46	1.5144	Aldo/keto reductase family
PF02463.16	4	2	6	6	4	6	3	6	7	1.51351	RecF/RecN/SMC N terminal domain
PF13641.3	8	7	11	8	10	10	9	11	14	1.51351	Glycosyltransferase like family 2
PF00083.21	52	91	142	114	166	143	119	151	185	1.51329	Sugar (and other) transporter
PF08241.9	46	44	71	57	75	80	48	77	94	1.51004	Methyltransferase domain
PF02129.15	2	3	4	3	2	6	7	5	6	1.5	X-Pro dipeptidyl-peptidase (S15 family)
PF13716.3	3	2	2	2	2	2	2	1	3	1.5	Divergent CRAL/TRIO domain
PF13831.3	2	2	3	1	2	3	1	2	3	1.5	PHD-finger
PF07521.9	3	2	2	2	2	2	1	2	3	1.5	Zn-dependent metallo-hydrolase RNA specificity domain
PF10996.5	3	2	2	2	2	2	1	2	3	1.5	Beta-Casp domain
PF06087.9	0	2	3	2	2	3	2	2	3	1.5	Tyrosyl-DNA phosphodiesterase
PF02265.13	2	1	2	1	2	2	3	3	3	1.5	S1/P1 Nuclease
PF02492.16	4	3	4	5	4	4	3	5	6	1.5	CobW/HypB/UreG, nucleotide-binding domain
PF16661.2	3	2	2	2	2	2	1	2	3	1.5	Metallo-beta-lactamase superfamily domain
PF13632.3	10	6	12	10	11	13	7	11	15	1.5	Glycosyl transferase family group 2
PF00190.19	2	1	6	4	5	5	3	6	6	1.5	Cupin
PF03060.12	4	4	4	5	5	4	2	4	6	1.5	Nitronate monooxygenase
PF07350.9	1	1	2	2	3	2	3	2	3	1.5	Protein of unknown function (DUF1479)
PF10021.6	2	1	3	1	4	3	0	2	3	1.5	Uncharacterized protein conserved in bacteria (DUF2263)
PF08242.9	25	29	47	35	55	53	32	56	62	1.49398	Methyltransferase domain
PF00141.20	6	6	5	9	6	5	9	13	11	1.49153	Peroxidase
PF03169.12	8	14	15	12	11	15	9	18	19	1.4902	OPT oligopeptide transporter protein
PF07519.8	1	5	3	10	10	2	6	6	8	1.48837	Tannase and feruloyl esterase
PF01042.18	1	3	6	5	10	7	4	7	8	1.48837	Endoribonuclease L-PSP
PF01118.21	2	1	5	3	3	5	4	4	5	1.48148	Semialdehyde dehydrogenase, NAD binding domain
PF12708.4	5	1	3	4	3	3	4	4	5	1.48148	Pectate lyase superfamily protein
PF01490.15	5	8	11	10	12	9	9	17	15	1.48148	Transmembrane amino acid transporter protein
PF00403.23	3	1	4	5	4	4	2	4	5	1.48148	Heavy-metal-associated domain
PF01764.22	6	5	8	7	8	8	5	7	10	1.48148	Lipase (class 3)
PF00432.18	3	0	5	5	4	5	0	5	5	1.48148	Prenyltransferase and squalene oxidase repeat
PF13516.3	2	2	4	2	4	4	2	7	5	1.48148	Leucine Rich repeat
PF01193.21	4	3	4	4	4	4	0	4	5	1.48148	RNA polymerase Rpb3/Rpb11 dimerisation domain
PF14833.3	2	3	4	3	5	3	2	5	5	1.48148	NAD-binding of NADP-dependent 3-hydroxyisobutyrate dehydrogenase
PF00536.27	5	2	4	3	5	3	2	3	5	1.48148	SAM domain (Sterile alpha motif)
PF11807.5	7	13	19	14	27	24	16	15	25	1.48148	Domain of unknown function (DUF3328)
PF00933.18	7	13	19	18	16	19	9	18	22	1.47899	Glycosyl hydrolase family 3 N terminal domain
PF13087.3	9	4	11	7	6	9	10	9	12	1.47692	AAA domain
PF06280.9	1	5	3	11	1	3	7	7	7	1.47368	Fn3-like domain
PF13207.3	3	3	6	5	5	7	4	5	7	1.47368	AAA domain
PF05978.13	3	2	7	4	5	6	2	9	7	1.47368	Ion channel regulatory protein UNC-93
PF01828.14	2	4	7	2	9	7	2	5	7	1.47368	Peptidase A4 family
PF08445.7	7	3	5	7	10	4	7	6	9	1.46939	FR47-like protein
PF00072.21	14	11	16	13	14	17	10	14	20	1.46789	Response regulator receiver domain
PF09362.7	8	5	3	11	6	3	10	14	11	1.46667	Domain of unknown function (DUF1996)
PF03663.11	7	7	9	8	11	10	9	10	13	1.46479	Glycosyl hydrolase family 76
PF01915.19	6	13	18	17	15	17	11	18	21	1.46087	Glycosyl hydrolase family 3 C-terminal domain
PF03443.11	8	14	10	22	12	10	23	27	23	1.46032	Glycosyl hydrolase family 61
PF13561.3	50	74	127	100	143	123	93	142	155	1.4554	Enoyl-(Acyl carrier protein) reductase
PF16010.2	3	3	6	9	3	6	7	7	8	1.45455	Cytochrome domain of cellobiose dehydrogenase
PF11309.5	1	2	1	2	1	2	0	2	2	1.45455	Protein of unknown function (DUF3112)
PF13919.3	4	1	1	1	1	1	1	1	2	1.45455	Asx homology domain
PF09056.8	2	0	2	2	1	2	1	1	2	1.45455	Prokaryotic phospholipase A2
PF04676.11	1	0	2	2	1	2	1	2	2	1.45455	Protein similar to CwfJ C-terminus 2
PF13243.3	1	0	2	2	1	2	1	2	2	1.45455	Squalene-hopene cyclase C-terminal domain
PF00037.24	2	0	2	2	1	2	0	2	2	1.45455	4Fe-4S binding domain
PF04577.11	0	3	0	3	1	0	1	3	2	1.45455	Protein of unknown function (DUF563)
PF06202.11	0	1	3	2	1	2	0	2	2	1.45455	Amylo-alpha-1,6-glucosidase
PF04068.12	1	1	2	2	1	2	0	2	2	1.45455	Possible Fer4-like domain in RNase L inhibitor, RLI
PF01693.13	1	0	2	1	1	2	2	2	2	1.45455	Caulimovirus viroplasmin
PF05746.12	1	1	2	1	1	2	1	2	2	1.45455	DALR anticodon binding domain
PF04042.13	3	3	3	3	3	3	1	3	4	1.45455	DNA polymerase alpha/epsilon subunit B
PF04191.10	3	1	3	3	3	3	2	4	4	1.45455	Phospholipid methyltransferase
PF02985.19	6	3	7	5	6	7	3	7	8	1.45455	HEAT repeat
PF00929.21	4	2	5	3	5	5	4	5	6	1.45455	Exonuclease
PF00789.17	1	3	5	5	5	6	3	5	6	1.45455	UBX domain
PF00627.28	2	1	5	6	5	6	2	6	6	1.45455	UBA/TS-N domain
PF09335.8	1	1	2	1	2	2	0	2	2	1.45455	SNARE associated Golgi protein
PF03987.12	0	1	2	2	2	2	1	1	2	1.45455	Autophagocytosis associated protein, active-site domain
PF05190.15	2	2	4	3	4	3	1	3	4	1.45455	MutS family domain IV
PF08316.8	0	1	2	1	2	2	1	2	2	1.45455	Pal1 cell morphology protein
PF12854.4	2	1	1	1	2	1	1	2	2	1.45455	PPR repeat
PF13188.4	2	0	2	2	2	2	0	1	2	1.45455	PAS domain
PF16076.2	1	1	1	2	2	1	1	2	2	1.45455	Acyltransferase C-terminus
PF01062.18	1	0	2	1	2	2	1	2	2	1.45455	Bestrophin, RFP-TM, chloride channel
PF01734.19	6	3	6	5	8	6	2	8	8	1.45455	Patatin-like phospholipase
PF06441.9	2	1	2	5	4	3	2	3	4	1.45455	Epoxide hydrolase N terminus
PF00916.17	3	1	4	6	6	4	4	5	6	1.45455	Sulfate permease family
PF05977.10	1	1	2	2	2	2	0	1	2	1.45455	Transmembrane secretion effector
PF09298.8	1	0	1	2	2	1	2	2	2	1.45455	Fumarylacetoacetase N-terminal
PF02207.17	1	1	2	2	2	1	0	2	2	1.45455	Putative zinc finger in N-recognin (UBR box)
PF12273.5	0	0	2	2	2	2	1	2	2	1.45455	Chitin synthesis regulation, resistance to Congo red
PF13805.3	0	0	2	2	2	2	1	2	2	1.45455	Eisosome component PIL1
PF16558.2	2	0	2	2	2	2	0	1	2	1.45455	Amino-terminal Zinc-binding domain of ubiquitin ligase E3A
PF00613.17	0	0	2	2	2	2	1	2	2	1.45455	Phosphoinositide 3-kinase family, accessory domain (PIK domain)
PF02878.13	0	0	2	2	2	2	1	2	2	1.45455	Phosphoglucomutase/phosphomannomutase, alpha/beta/alpha domain I
PF00984.16	3	1	1	0	2	1	1	2	2	1.45455	UDP-glucose/GDP-mannose dehydrogenase family, central domain
PF08616.7	1	2	1	2	2	2	0	1	2	1.45455	Stabilization of polarity axis
PF08324.8	1	0	2	2	2	2	0	2	2	1.45455	PUL domain
PF03720.12	3	1	1	0	2	1	1	2	2	1.45455	UDP-glucose/GDP-mannose dehydrogenase family, UDP binding domain
PF02728.13	1	1	1	2	2	1	1	2	2	1.45455	Copper amine oxidase, N3 domain
PF01216.14	1	0	2	1	2	2	1	2	2	1.45455	Calsequestrin
PF02929.14	1	1	1	3	2	1	1	1	2	1.45455	Beta galactosidase small chain
PF08583.7	0	0	2	2	2	2	1	2	2	1.45455	Cytochrome c oxidase biogenesis protein Cmc1 like
PF02221.12	1	2	1	1	2	1	1	2	2	1.45455	ML domain
PF00408.17	0	0	2	2	2	2	1	2	2	1.45455	Phosphoglucomutase/phosphomannomutase, C-terminal domain
PF00615.16	3	5	6	4	9	5	5	7	8	1.45455	Regulator of G protein signaling domain
PF07992.11	18	24	40	31	37	41	33	46	49	1.45185	Pyridine nucleotide-disulphide oxidoreductase
PF09334.8	3	3	7	7	7	8	5	10	9	1.44	tRNA synthetases class I (M)
PF00106.22	58	92	158	123	170	154	114	165	186	1.43907	short chain dehydrogenase
PF00004.26	30	34	66	62	62	64	46	65	77	1.4359	ATPase family associated with various cellular activities (AAA)
PF14226.3	4	9	22	14	17	23	9	19	21	1.4359	non-haem dioxygenase in morphine synthesis N-terminal
PF06723.10	4	2	5	6	6	7	3	6	7	1.4359	MreB/Mbl protein
PF13191.3	7	3	6	5	7	4	3	4	7	1.4359	AAA ATPase domain
PF00903.22	2	7	5	6	7	5	1	6	7	1.4359	Glyoxalase/Bleomycin resistance protein/Dioxygenase superfamily
PF00026.20	13	19	24	20	28	27	19	23	31	1.43353	Eukaryotic aspartyl protease
PF13418.3	6	6	7	10	7	8	7	5	10	1.42857	Galactose oxidase, central domain
PF00891.15	7	7	20	16	14	22	12	14	20	1.42857	O-methyltransferase
PF13426.4	10	6	6	7	7	6	6	8	10	1.42857	PAS domain
PF00850.16	2	3	4	4	4	4	3	4	5	1.42857	Histone deacetylase domain
PF01679.14	2	3	5	4	4	5	2	3	5	1.42857	Proteolipid membrane potential modulator
PF01363.18	2	2	4	5	4	5	4	2	5	1.42857	FYVE zinc finger
PF04675.11	3	3	4	4	4	4	3	3	5	1.42857	DNA ligase N terminus
PF13847.3	20	28	49	46	48	53	32	50	58	1.42331	Methyltransferase domain
PF11790.5	4	6	7	4	5	7	5	7	8	1.42222	Glycosyl hydrolase catalytic core
PF03198.11	2	5	6	5	8	6	5	8	8	1.42222	Glucanosyltransferase
PF00107.23	24	39	57	52	68	63	48	71	75	1.4218	Zinc-binding dehydrogenase
PF13489.3	47	41	68	52	70	71	42	71	82	1.41991	Methyltransferase domain
PF00884.20	2	6	10	8	12	12	4	8	11	1.41935	Sulfatase
PF00512.22	10	8	11	9	9	12	9	11	14	1.41772	His Kinase A (phospho-acceptor) domain
PF08550.7	3	1	3	3	1	3	2	1	3	1.41176	Fungal protein of unknown function (DUF1752)
PF12351.5	2	0	3	3	2	3	1	3	3	1.41176	Ca2+ regulator and membrane fusion protein Fig1
PF01341.14	3	2	1	3	2	1	1	4	3	1.41176	Glycosyl hydrolases family 6
PF00797.14	1	1	3	2	2	3	2	3	3	1.41176	N-acetyltransferase
PF01417.17	1	1	3	3	2	3	1	3	3	1.41176	ENTH domain
PF01853.15	2	1	3	3	2	3	1	2	3	1.41176	MOZ/SAS family
PF01171.17	2	1	3	2	2	4	1	2	3	1.41176	PP-loop family
PF02390.14	2	1	2	3	2	2	2	3	3	1.41176	Putative methyltransferase
PF00638.15	4	1	2	3	2	2	1	2	3	1.41176	RanBP1 domain
PF12678.4	6	6	4	6	5	3	3	1	6	1.41176	RING-H2 zinc finger domain
PF01202.19	3	4	5	4	5	5	2	6	6	1.41176	Shikimate kinase
PF07217.8	1	1	3	3	3	3	0	3	3	1.41176	Heterokaryon incompatibility protein Het-C
PF01428.13	2	2	2	2	3	2	1	3	3	1.41176	AN1-like Zinc finger
PF00447.14	1	2	3	3	3	2	1	2	3	1.41176	HSF-type DNA-binding
PF02629.16	1	1	3	3	3	3	0	3	3	1.41176	CoA binding domain
PF12464.5	2	2	1	3	3	2	1	3	3	1.41176	Maltose acetyltransferase
PF02668.13	8	14	13	10	16	14	13	26	20	1.40351	Taurine catabolism dioxygenase TauD, TfdA family
PF00043.22	7	9	14	6	11	14	7	12	14	1.4	Glutathione S-transferase, C-terminal domain
PF00703.18	3	2	5	8	6	4	5	7	7	1.4	Glycosyl hydrolases family 2
PF01544.15	6	10	18	7	17	21	11	13	18	1.39806	CorA-like Mg2+ transporter protein
PF00501.25	19	30	52	48	47	55	35	47	58	1.39339	AMP-binding enzyme
PF06470.10	3	2	4	4	0	4	2	4	4	1.3913	SMC proteins Flexible Hinge Domain
PF06094.9	1	3	6	2	1	5	1	4	4	1.3913	Gamma-glutamyl cyclotransferase, AIG2-like
PF03009.14	4	2	2	4	2	2	3	4	4	1.3913	Glycerophosphoryl diester phosphodiesterase family
PF02037.24	4	3	4	4	3	4	0	1	4	1.3913	SAP domain
PF13519.3	5	2	3	3	3	3	2	2	4	1.3913	von Willebrand factor type A domain
PF00232.15	2	5	3	2	3	3	1	4	4	1.3913	Glycosyl hydrolase family 1
PF11927.5	3	2	4	2	3	4	1	4	4	1.3913	Protein of unknown function (DUF3445)
PF00406.19	2	1	4	3	3	4	3	3	4	1.3913	Adenylate kinase
PF13802.3	3	2	3	4	3	3	2	3	4	1.3913	Galactose mutarotase-like
PF00857.17	2	3	8	6	7	8	5	7	8	1.3913	Isochorismatase family
PF00637.17	1	1	3	4	4	4	2	4	4	1.3913	Region in Clathrin and VPS
PF08699.7	3	2	3	3	4	3	2	3	4	1.3913	Argonaute linker 1 domain
PF12756.4	3	1	4	3	4	4	1	3	4	1.3913	C2H2 type zinc-finger (2 copies)
PF13401.3	3	4	7	5	9	7	3	8	8	1.3913	AAA domain
PF13649.3	43	44	72	60	74	82	44	76	86	1.3899	Methyltransferase domain
PF08659.7	47	68	121	103	124	121	88	134	140	1.38958	KR domain
PF00018.25	14	9	18	18	15	19	12	16	21	1.38843	SH3 domain
PF04616.11	3	11	17	18	16	17	15	24	21	1.38843	Glycosyl hydrolases family 43
PF01663.19	2	7	7	6	8	8	5	9	9	1.38462	Type I phosphodiesterase / nucleotide pyrophosphatase
PF01793.13	3	3	4	4	3	4	4	4	5	1.37931	Glycolipid 2-alpha-mannosyltransferase
PF13483.3	3	3	5	6	4	4	1	3	5	1.37931	Beta-lactamase superfamily domain
PF01207.14	1	2	5	4	5	5	2	5	5	1.37931	Dihydrouridine synthase (Dus)
PF00892.17	2	2	4	5	5	6	2	3	5	1.37931	EamA-like transporter family
PF03372.20	13	6	12	12	11	11	13	15	16	1.37634	Endonuclease/Exonuclease/phosphatase family
PF04408.20	5	4	10	9	9	10	7	10	11	1.375	Helicase associated domain (HA2)
PF00144.21	4	3	11	9	10	10	6	11	11	1.375	Beta-lactamase
PF00387.16	2	4	5	5	5	5	4	5	6	1.37143	Phosphatidylinositol-specific phospholipase C, Y domain
PF08240.9	18	26	43	42	50	51	37	54	55	1.37072	Alcohol dehydrogenase GroES-like domain
PF02518.23	16	16	21	18	19	21	17	18	25	1.36986	Histidine kinase-, DNA gyrase B-, and HSP90-like ATPase
PF00743.16	6	14	24	19	20	22	21	26	26	1.36842	Flavin-binding monooxygenase-like
PF13692.3	5	2	6	5	5	6	4	8	7	1.36585	Glycosyl transferases group 1
PF00415.15	5	2	6	5	5	6	6	6	7	1.36585	Regulator of chromosome condensation (RCC1) repeat
PF01398.18	5	5	7	7	6	7	4	6	8	1.3617	JAB1/Mov34/MPN/PAD-1 ubiquitin protease
PF00667.17	3	5	6	9	8	6	3	7	8	1.3617	FAD binding domain
PF00533.23	6	4	7	10	6	9	4	7	9	1.35849	BRCA1 C Terminus (BRCT) domain
PF00383.20	9	3	8	7	8	9	5	10	10	1.35593	Cytidine and deoxycytidylate deaminase zinc-binding region
PF03446.12	7	7	14	8	15	12	5	9	13	1.35065	NAD binding domain of 6-phosphogluconate dehydrogenase
PF13193.3	7	10	18	20	16	18	8	16	19	1.34513	AMP-binding enzyme C-terminal domain
PF10180.6	1	1	1	1	0	1	0	1	1	1.33333	Uncharacterised conserved protein (DUF2373)
PF05470.9	0	1	1	1	0	1	1	1	1	1.33333	Eukaryotic translation initiation factor 3 subunit 8 N-terminus
PF04615.10	1	0	1	1	0	1	1	1	1	1.33333	Utp14 protein
PF04739.12	1	1	1	1	0	1	0	1	1	1.33333	5'-AMP-activated protein kinase beta subunit, interaction domain
PF10495.6	1	0	1	1	0	1	1	1	1	1.33333	Pericentrin-AKAP-450 domain of centrosomal targeting protein
PF05178.9	1	1	1	1	0	1	0	1	1	1.33333	KRI1-like family
PF04652.13	0	1	1	1	0	1	1	1	1	1.33333	Vta1 like
PF08297.8	1	1	1	1	0	1	0	1	1	1.33333	U3 snoRNA associated
PF12110.5	1	0	1	1	0	1	1	1	1	1.33333	Nuclear protein 96
PF03467.12	1	1	1	1	0	1	0	1	1	1.33333	Smg-4/UPF3 family
PF10307.6	1	0	1	1	0	1	1	1	1	1.33333	Hypothetical protein (DUF2410)
PF11262.5	0	1	1	1	0	1	1	1	1	1.33333	Transcription factor/nuclear export subunit protein 2
PF04096.11	1	0	1	1	0	1	1	1	1	1.33333	Nucleoporin autopeptidase
PF06367.13	1	1	1	1	0	1	0	1	1	1.33333	Diaphanous FH3 Domain
PF09759.6	1	0	1	1	0	1	1	1	1	1.33333	Spinocerebellar ataxia type 10 protein domain
PF03568.14	1	1	1	1	0	1	0	1	1	1.33333	Peptidase family C50
PF12247.5	1	0	1	1	0	1	1	1	1	1.33333	Temperature dependent protein affecting M2 dsRNA replication
PF16134.2	0	1	1	1	0	1	1	1	1	1.33333	THO complex subunit 2 N-terminus
PF11911.5	1	0	1	1	0	1	1	1	1	1.33333	Protein of unknown function (DUF3429)
PF05724.8	1	0	1	1	0	1	1	1	1	1.33333	Thiopurine S-methyltransferase (TPMT)
PF07780.9	1	0	1	1	0	1	1	1	1	1.33333	Spb1 C-terminal domain
PF15406.3	0	1	1	1	0	1	1	1	1	1.33333	Pleckstrin homology domain
PF04874.11	1	1	1	1	0	1	0	1	1	1.33333	Mak16 protein C-terminal region
PF10360.6	2	0	1	1	0	1	0	1	1	1.33333	Protein of unknown function (DUF2433)
PF08603.8	0	1	1	1	0	1	1	1	1	1.33333	Adenylate cyclase associated (CAP) C terminal
PF04229.11	0	2	0	0	0	0	1	3	1	1.33333	GrpB protein
PF14826.3	1	1	1	1	0	1	0	1	1	1.33333	FACT complex subunit SPT16 N-terminal lobe domain
PF13945.3	0	1	1	1	0	1	1	1	1	1.33333	Salt tolerance down-regulator
PF11699.5	0	1	1	1	0	1	1	1	1	1.33333	Mif2/CENP-C like
PF08644.8	1	1	1	1	0	1	0	1	1	1.33333	FACT complex subunit (SPT16/CDC68)
PF09454.7	1	1	1	1	0	1	0	1	1	1.33333	Vps23 core domain
PF15459.3	1	1	1	1	0	1	0	1	1	1.33333	60S ribosome biogenesis protein Rrp14
PF12246.5	1	0	1	1	0	1	1	1	1	1.33333	Temperature dependent protein affecting M2 dsRNA replication
PF14273.3	0	2	0	4	0	0	3	3	2	1.33333	Domain of unknown function (DUF4360)
PF13254.3	1	1	1	1	0	1	1	0	1	1.33333	Domain of unknown function (DUF4045)
PF09724.6	1	1	1	1	0	1	0	1	1	1.33333	Uncharacterized conserved protein (DUF2036)
PF08581.7	0	1	1	1	0	1	1	1	1	1.33333	Tup N-terminal
PF13555.3	1	1	1	1	0	1	0	1	1	1.33333	P-loop containing region of AAA domain
PF13446.3	1	1	1	0	0	1	1	1	1	1.33333	A repeated domain in UCH-protein
PF01213.16	0	1	1	1	0	1	1	1	1	1.33333	Adenylate cyclase associated (CAP) N terminal
PF13339.3	1	0	1	1	0	1	1	1	1	1.33333	Apoptosis antagonizing transcription factor
PF13875.3	1	0	1	1	0	1	1	1	1	1.33333	Domain of unknown function (DUF4202)
PF08164.9	1	0	1	1	0	1	1	1	1	1.33333	Apoptosis-antagonizing transcription factor, C-terminal
PF06732.8	0	1	1	1	0	1	1	1	1	1.33333	Pescadillo N-terminus
PF15624.3	0	1	1	1	0	1	1	1	1	1.33333	Kinetochore CENP-C fungal homologue, Mif2, N-terminal
PF05205.9	1	1	1	1	0	1	0	1	1	1.33333	COMPASS (Complex proteins associated with Set1p) component shg1
PF04935.9	1	1	1	1	0	1	0	1	1	1.33333	Surfeit locus protein 6
PF13085.3	2	0	1	1	0	1	0	1	1	1.33333	2Fe-2S iron-sulfur cluster binding domain
PF11861.5	1	0	1	1	0	1	1	1	1	1.33333	Domain of unknown function (DUF3381)
PF09598.7	1	1	1	1	0	1	1	0	1	1.33333	Stm1
PF08292.9	1	1	1	1	0	1	0	1	1	1.33333	RNA polymerase III subunit Rpc25
PF07817.10	1	1	1	1	0	1	1	0	1	1.33333	GLE1-like protein
PF03999.9	0	1	1	1	0	1	1	1	1	1.33333	Microtubule associated protein (MAP65/ASE1 family)
PF04871.10	1	1	0	1	0	1	1	1	1	1.33333	Uso1 / p115 like vesicle tethering protein, C terminal region
PF06012.9	0	1	1	1	0	1	1	1	1	1.33333	Domain of Unknown Function (DUF908)
PF03983.9	2	0	1	1	0	1	0	1	1	1.33333	SLA1 homology domain 1, SHD1
PF12936.4	1	1	1	1	0	1	0	1	1	1.33333	KRI1-like family C-terminal
PF17047.2	0	1	1	1	0	1	1	1	1	1.33333	Synaptotagmin-like mitochondrial-lipid-binding domain
PF11464.5	0	1	1	1	0	1	1	1	1	1.33333	Rabenosyn Rab binding domain
PF09280.8	1	1	1	1	0	1	0	1	1	1.33333	XPC-binding domain
PF09073.7	1	0	1	1	0	1	1	1	1	1.33333	BUD22
PF01443.15	1	1	1	1	0	1	0	1	1	1.33333	Viral (Superfamily 1) RNA helicase
PF12757.4	1	0	1	1	0	1	1	1	1	1.33333	Protein of unknown function (DUF3812)
PF12931.4	3	2	2	2	0	2	0	1	2	1.33333	Sec23-binding domain of Sec16
PF10375.6	1	0	1	1	0	1	1	1	1	1.33333	GRIP-related Arf-binding domain
PF06991.8	1	1	1	1	0	1	0	1	1	1.33333	Microfibril-associated/Pre-mRNA processing
PF06025.9	0	1	1	1	0	1	1	1	1	1.33333	Domain of Unknown Function (DUF913)
PF07926.9	1	0	1	1	0	1	1	1	1	1.33333	TPR/MLP1/MLP2-like protein
PF11732.5	0	1	1	1	0	1	1	1	1	1.33333	Transcription- and export-related complex subunit
PF09631.7	1	1	1	1	0	1	0	1	1	1.33333	Sen15 protein
PF08313.9	1	1	1	1	0	1	0	1	1	1.33333	SCA7, zinc-binding domain
PF14737.3	3	0	2	1	1	2	2	1	2	1.33333	Domain of unknown function (DUF4470)
PF15405.3	2	1	2	2	1	2	1	1	2	1.33333	Pleckstrin homology domain
PF01246.17	0	2	2	2	1	2	1	2	2	1.33333	Ribosomal protein L24e
PF07958.8	2	1	2	1	1	2	2	1	2	1.33333	Protein of unknown function (DUF1688)
PF08443.8	2	1	2	2	1	1	2	1	2	1.33333	RimK-like ATP-grasp domain
PF00750.16	1	1	2	2	1	2	1	2	2	1.33333	tRNA synthetases class I (R)
PF17177.1	2	2	2	1	1	2	1	1	2	1.33333	Pentacotripeptide-repeat region of PROPR
PF00398.17	2	1	2	2	1	2	0	2	2	1.33333	Ribosomal RNA adenine dimethylase
PF00641.15	2	3	1	1	1	1	2	1	2	1.33333	Zn-finger in Ran binding protein and others
PF06371.10	2	1	2	2	1	2	0	2	2	1.33333	Diaphanous GTPase-binding Domain
PF02891.17	3	2	1	2	1	1	1	1	2	1.33333	MIZ/SP-RING zinc finger
PF13541.3	1	2	2	1	1	2	1	2	2	1.33333	Subunit ChlI of Mg-chelatase
PF01180.18	2	1	2	2	1	1	1	2	2	1.33333	Dihydroorotate dehydrogenase
PF08598.8	2	1	2	2	1	2	0	2	2	1.33333	Sds3-like
PF02185.13	0	2	2	2	1	2	1	2	2	1.33333	Hr1 repeat
PF13476.3	3	1	6	6	3	3	4	4	5	1.33333	AAA domain
PF09949.6	2	1	3	3	2	3	1	3	3	1.33333	Uncharacterized conserved protein (DUF2183)
PF13393.3	2	1	3	2	2	3	2	3	3	1.33333	Histidyl-tRNA synthetase
PF00397.23	5	6	8	10	6	8	4	7	9	1.33333	WW domain
PF01965.21	2	3	4	8	4	3	5	7	6	1.33333	DJ-1/PfpI family
PF13098.3	3	1	2	2	2	2	3	3	3	1.33333	Thioredoxin-like domain
PF01613.15	2	3	3	2	2	3	0	3	3	1.33333	Flavin reductase like domain
PF06964.9	1	3	2	3	2	2	2	3	3	1.33333	Alpha-L-arabinofuranosidase C-terminal domain
PF02732.12	0	2	3	3	2	3	2	3	3	1.33333	ERCC4 domain
PF00201.15	2	2	7	7	5	7	6	6	7	1.33333	UDP-glucoronosyl and UDP-glucosyl transferase
PF00370.18	3	2	3	4	3	3	2	4	4	1.33333	FGGY family of carbohydrate kinases, N-terminal domain
PF04564.12	4	3	3	2	3	3	3	3	4	1.33333	U-box domain
PF00133.19	3	3	7	8	6	8	4	9	8	1.33333	tRNA synthetases class I (I, L, M and V)
PF00520.28	1	2	4	2	3	4	4	4	4	1.33333	Ion transport protein
PF00534.17	6	2	8	6	6	8	4	8	8	1.33333	Glycosyl transferases group 1
PF13012.3	3	4	4	4	4	4	3	4	5	1.33333	Maintenance of mitochondrial structure and function
PF00349.18	3	2	5	4	4	5	2	5	5	1.33333	Hexokinase
PF01487.12	4	5	4	4	4	4	1	4	5	1.33333	Type I 3-dehydroquinase
PF00137.18	2	2	4	6	4	4	4	4	5	1.33333	ATP synthase subunit C
PF05730.8	8	12	9	20	13	12	10	12	16	1.33333	CFEM domain
PF00628.26	7	6	10	10	9	11	5	8	11	1.33333	PHD-finger
PF00296.17	5	5	6	1	5	5	3	6	6	1.33333	Luciferase-like monooxygenase
PF08534.7	4	5	4	4	5	5	3	6	6	1.33333	Redoxin
PF00285.18	4	8	4	3	5	4	3	5	6	1.33333	Citrate synthase, C-terminal domain
PF00650.17	5	3	5	5	5	5	3	5	6	1.33333	CRAL/TRIO domain
PF16209.2	4	4	5	5	5	5	4	4	6	1.33333	Phospholipid-translocating ATPase N-terminal
PF03151.13	4	4	6	5	6	6	4	7	7	1.33333	Triose-phosphate Transporter family
PF02353.17	2	12	11	14	12	12	9	12	14	1.33333	Mycolic acid cyclopropane synthetase
PF07728.11	16	11	19	18	21	19	15	19	23	1.33333	AAA domain (dynein-related subfamily)
PF01285.15	0	1	1	0	1	1	1	1	1	1.33333	TEA/ATTS domain family
PF09441.7	1	0	1	1	1	1	1	0	1	1.33333	ARS binding protein 2
PF06522.8	0	1	1	1	1	1	0	1	1	1.33333	NADH-ubiquinone reductase complex 1 MLRQ subunit
PF10203.6	0	1	0	1	1	1	1	1	1	1.33333	Cytochrome c oxidase assembly protein PET191
PF03871.11	0	0	1	1	1	1	1	1	1	1.33333	RNA polymerase Rpb5, N-terminal domain
PF08617.7	0	1	1	1	1	1	0	1	1	1.33333	Kinase binding protein CGI-121
PF12900.4	1	0	1	1	1	1	0	1	1	1.33333	Pyridoxamine 5'-phosphate oxidase
PF08615.8	0	1	1	1	1	1	0	1	1	1.33333	Ribonuclease H2 non-catalytic subunit (Ylr154p-like)
PF02238.12	1	0	1	1	1	0	1	1	1	1.33333	Cytochrome c oxidase subunit VII
PF14716.3	1	0	2	2	2	2	1	2	2	1.33333	Helix-hairpin-helix domain
PF04063.11	0	1	1	1	1	1	0	1	1	1.33333	Domain of unknown function (DUF383)
PF01541.21	1	1	1	0	1	1	0	1	1	1.33333	GIY-YIG catalytic domain
PF10338.6	0	1	1	1	1	1	0	1	1	1.33333	Protein of unknown function (DUF2423)
PF15460.3	1	0	1	1	1	1	0	1	1	1.33333	Something about silencing, SAS, complex subunit 4
PF04418.9	1	0	1	1	1	1	0	1	1	1.33333	Domain of unknown function (DUF543)
PF06984.10	0	1	1	1	1	1	0	1	1	1.33333	Mitochondrial 39-S ribosomal protein L47 (MRP-L47)
PF12739.4	0	1	1	1	1	1	0	1	1	1.33333	ER-Golgi trafficking TRAPP I complex 85 kDa subunit
PF09329.8	1	0	1	1	1	1	0	1	1	1.33333	Primase zinc finger
PF10336.6	0	1	1	1	1	1	0	1	1	1.33333	Protein of unknown function (DUF2420)
PF16686.2	1	0	1	1	1	1	0	1	1	1.33333	ssDNA-binding domain of telomere protection protein
PF07479.11	0	0	1	2	1	1	0	1	1	1.33333	NAD-dependent glycerol-3-phosphate dehydrogenase C-terminus
PF08427.7	0	0	1	1	1	1	1	1	1	1.33333	Domain of unknown function (DUF1741)
PF05176.11	0	0	1	1	1	1	1	1	1	1.33333	ATP10 protein
PF12719.4	0	1	1	1	1	1	0	1	1	1.33333	Nuclear condensing complex subunits, C-term domain
PF04258.10	0	1	1	1	1	1	0	1	1	1.33333	Signal peptide peptidase
PF02906.11	0	0	1	1	1	1	1	1	1	1.33333	Iron only hydrogenase large subunit, C-terminal domain
PF03416.16	1	0	1	1	1	1	0	1	1	1.33333	Peptidase family C54
PF05856.9	0	0	1	1	1	1	1	1	1	1.33333	ARP2/3 complex 20 kDa subunit (ARPC4)
PF05063.11	0	1	1	1	1	1	1	0	1	1.33333	MT-A70
PF01035.17	2	0	2	2	2	2	1	1	2	1.33333	6-O-methylguanine DNA methyltransferase, DNA binding domain
PF04757.11	0	1	3	3	3	3	2	3	3	1.33333	Pex2 / Pex12 amino terminal region
PF07989.8	2	0	3	2	3	3	3	2	3	1.33333	Centrosomin N-terminal motif 1
PF03943.10	0	0	1	1	1	1	1	1	1	1.33333	TAP C-terminal domain
PF03152.11	1	1	2	2	2	2	0	2	2	1.33333	Ubiquitin fusion degradation protein UFD1
PF01393.16	1	0	1	1	1	1	0	1	1	1.33333	Chromo shadow domain
PF06395.8	1	0	1	1	1	1	0	1	1	1.33333	CDC24 Calponin
PF05183.9	1	3	4	3	4	4	1	4	4	1.33333	RNA dependent RNA polymerase
PF07393.8	1	0	2	2	2	2	1	2	2	1.33333	Exocyst complex component Sec10
PF03982.10	0	0	1	1	1	1	1	1	1	1.33333	Diacylglycerol acyltransferase
PF09696.7	1	0	1	1	1	0	1	1	1	1.33333	Ctf8
PF08311.9	1	0	1	1	1	1	0	1	1	1.33333	Mad3/BUB1 homology region 1
PF08640.8	1	0	1	1	1	1	0	1	1	1.33333	U3 small nucleolar RNA-associated protein 6
PF06775.11	1	0	1	1	1	1	0	1	1	1.33333	Putative adipose-regulatory protein (Seipin)
PF05346.8	1	0	1	1	1	1	0	1	1	1.33333	Eukaryotic membrane protein family
PF06246.9	0	0	1	1	1	1	1	1	1	1.33333	Isy1-like splicing family
PF04137.12	0	0	1	1	1	1	1	1	1	1.33333	Endoplasmic Reticulum Oxidoreductin 1 (ERO1)
PF08569.8	1	0	1	1	1	1	0	1	1	1.33333	Mo25-like
PF00312.19	1	0	2	2	2	2	1	2	2	1.33333	Ribosomal protein S15
PF07558.8	1	1	0	1	1	1	1	0	1	1.33333	Shugoshin N-terminal coiled-coil region
PF07534.13	2	1	2	2	2	2	0	1	2	1.33333	TLD
PF09507.7	0	1	1	1	1	1	0	1	1	1.33333	DNA polymerase subunit Cdc27
PF08392.9	1	0	1	1	1	1	1	0	1	1.33333	FAE1/Type III polyketide synthase-like protein
PF08771.8	1	0	1	1	1	1	0	1	1	1.33333	Rapamycin binding domain
PF06432.8	0	1	1	1	1	1	0	1	1	1.33333	Phosphatidylinositol N-acetylglucosaminyltransferase
PF16797.2	0	1	1	1	1	1	0	1	1	1.33333	Fungal kinase associated-1 domain
PF16770.2	1	0	1	1	1	1	0	1	1	1.33333	Regulator of Ty1 transposition protein 107 BRCT domain
PF08660.8	1	1	1	0	1	1	1	0	1	1.33333	Oligosaccharide biosynthesis protein Alg14 like
PF15985.2	0	1	1	1	1	1	0	1	1	1.33333	KH domain
PF10441.6	1	0	1	1	1	1	0	1	1	1.33333	Urb2/Npa2 family
PF00810.15	0	1	2	2	2	2	1	2	2	1.33333	ER lumen protein retaining receptor
PF08520.7	4	0	1	1	2	1	2	1	2	1.33333	Fungal protein of unknown function (DUF1748)
PF10451.6	1	0	1	0	1	1	1	1	1	1.33333	Telomere regulation protein Stn1
PF07189.8	0	1	1	1	1	1	0	1	1	1.33333	Splicing factor 3B subunit 10 (SF3b10)
PF01595.17	1	0	1	1	1	1	0	1	1	1.33333	Domain of unknown function DUF21
PF01798.15	2	0	3	3	3	3	1	3	3	1.33333	snoRNA binding domain, fibrillarin
PF10187.6	0	0	1	1	1	1	1	1	1	1.33333	N-terminal domain of NEFA-interacting nuclear protein NIP30
PF11785.5	2	0	1	1	1	1	0	0	1	1.33333	Aft1 osmotic stress response (OSM) domain
PF12720.4	0	0	1	1	1	1	1	1	1	1.33333	Protein of unknown function (DUF3807)
PF09733.6	0	1	1	1	1	1	1	0	1	1.33333	VEFS-Box of polycomb protein
PF07792.9	1	1	0	1	1	1	0	1	1	1.33333	Docking domain of Afi1 for Arf3 in vesicle trafficking
PF08743.7	0	0	1	1	1	1	1	1	1	1.33333	Nse4 C-terminal
PF12328.5	1	0	1	1	1	1	0	1	1	1.33333	Rpp20 subunit of nuclear RNase MRP and P
PF14666.3	0	1	1	1	1	1	0	1	1	1.33333	Rapamycin-insensitive companion of mTOR, middle domain
PF02774.15	0	1	1	1	1	1	0	1	1	1.33333	Semialdehyde dehydrogenase, dimerisation domain
PF03947.15	1	1	2	2	2	1	1	2	2	1.33333	Ribosomal Proteins L2, C-terminal domain
PF01264.18	0	0	1	1	1	1	1	1	1	1.33333	Chorismate synthase
PF10775.6	0	0	1	1	1	1	1	1	1	1.33333	ATP synthase complex subunit h
PF05615.10	0	0	1	1	1	1	1	1	1	1.33333	Tho complex subunit 7
PF07818.10	1	0	1	1	1	1	0	1	1	1.33333	HCNGP-like protein
PF10296.6	0	2	3	3	3	3	2	2	3	1.33333	Maintenance of mitochondrial morphology protein 1
PF00181.20	1	1	2	2	2	1	1	2	2	1.33333	Ribosomal Proteins L2, RNA binding domain
PF13911.3	2	3	2	1	3	2	3	2	3	1.33333	AhpC/TSA antioxidant enzyme
PF13507.3	0	1	1	1	1	1	0	1	1	1.33333	CobB/CobQ-like glutamine amidotransferase domain
PF07544.10	1	0	1	1	1	1	0	1	1	1.33333	RNA polymerase II transcription mediator complex subunit 9
PF08235.10	0	0	1	1	1	1	1	1	1	1.33333	LNS2 (Lipin/Ned1/Smp2)
PF00792.21	0	0	1	1	1	1	1	1	1	1.33333	Phosphoinositide 3-kinase C2
PF14668.3	0	1	1	1	1	1	0	1	1	1.33333	Rapamycin-insensitive companion of mTOR, domain 5
PF02984.16	1	0	3	3	3	3	2	3	3	1.33333	Cyclin, C-terminal domain
PF15879.2	1	0	1	1	1	1	0	1	1	1.33333	NADH-ubiquinone oxidoreductase MWFE subunit
PF09416.7	1	0	1	1	1	1	0	1	1	1.33333	RNA helicase (UPF2 interacting domain)
PF13324.3	1	0	1	1	1	1	0	1	1	1.33333	Grap2 and cyclin-D-interacting
PF10361.6	1	0	1	1	1	1	0	1	1	1.33333	Protein of unknown function (DUF2434)
PF09488.7	0	0	1	1	1	1	1	1	1	1.33333	Mannosyl-3-phosphoglycerate synthase (osmo_MPGsynth)
PF01984.17	0	1	1	1	1	1	0	1	1	1.33333	Double-stranded DNA-binding domain
PF10159.6	1	1	1	1	1	0	1	0	1	1.33333	Kinase phosphorylation protein
PF09415.7	0	0	1	1	1	1	1	1	1	1.33333	CENP-S associating Centromere protein X
PF12921.4	1	1	1	0	1	0	1	1	1	1.33333	Mitochondrial ATPase expression
PF11443.5	0	1	1	1	1	1	0	1	1	1.33333	Domain of unknown function (DUF2828)
PF02928.13	1	1	1	1	1	1	0	0	1	1.33333	C5HC2 zinc finger
PF11899.5	0	0	1	1	1	1	1	1	1	1.33333	Protein of unknown function (DUF3419)
PF02874.20	1	3	4	4	4	3	1	4	4	1.33333	ATP synthase alpha/beta family, beta-barrel domain
PF11865.5	1	0	1	1	1	1	0	1	1	1.33333	Domain of unknown function (DUF3385)
PF09341.7	0	0	1	1	1	1	1	1	1	1.33333	Transcription factor Pcc1
PF02291.12	0	0	1	1	1	1	1	1	1	1.33333	Transcription initiation factor IID, 31kD subunit
PF09359.7	1	1	2	2	2	2	0	2	2	1.33333	VTC domain
PF04115.9	1	0	0	1	1	1	1	1	1	1.33333	Ureidoglycolate lyase
PF01232.20	0	1	2	2	2	2	1	2	2	1.33333	Mannitol dehydrogenase Rossmann domain
PF12554.5	0	1	1	1	1	1	0	1	1	1.33333	Mitotic-spindle organizing gamma-tubulin ring associated
PF04756.10	3	2	4	2	4	4	2	3	4	1.33333	OST3 / OST6 family, transporter family
PF03215.12	0	3	5	5	5	5	2	5	5	1.33333	Rad17 cell cycle checkpoint protein
PF01502.15	0	0	1	1	1	1	1	1	1	1.33333	Phosphoribosyl-AMP cyclohydrolase
PF09424.7	0	1	1	1	1	1	0	1	1	1.33333	Yqey-like protein
PF01918.18	2	1	2	0	2	2	1	2	2	1.33333	Alba
PF04113.11	1	0	1	1	1	1	0	1	1	1.33333	Gpi16 subunit, GPI transamidase component
PF13041.3	3	3	3	3	4	3	2	3	4	1.33333	PPR repeat family
PF04825.10	0	1	2	2	2	2	1	2	2	1.33333	N terminus of Rad21 / Rec8 like protein
PF03159.15	2	0	2	2	2	2	0	2	2	1.33333	XRN 5'-3' exonuclease N-terminus
PF02545.11	0	0	1	1	1	1	1	1	1	1.33333	Maf-like protein
PF13369.3	1	0	2	1	2	2	2	2	2	1.33333	Transglutaminase-like superfamily
PF03501.12	0	1	1	1	1	1	0	1	1	1.33333	Plectin/S10 domain
PF04032.13	0	2	2	2	2	1	2	1	2	1.33333	RNAse P Rpr2/Rpp21/SNM1 subunit domain
PF01512.14	1	0	1	1	1	1	0	1	1	1.33333	Respiratory-chain NADH dehydrogenase 51 Kd subunit
PF01014.15	0	1	1	1	1	1	0	1	1	1.33333	Uricase
PF03853.12	1	1	2	2	2	2	1	1	2	1.33333	YjeF-related protein N-terminus
PF08170.9	0	1	1	1	1	1	0	1	1	1.33333	POPLD (NUC188) domain
PF09732.6	0	0	1	1	1	1	1	1	1	1.33333	Cactus-binding C-terminus of cactin protein
PF09324.7	0	1	1	1	1	1	0	1	1	1.33333	Domain of unknown function (DUF1981)
PF15932.2	0	1	1	1	1	1	0	1	1	1.33333	Domain of unknown function (DUF4748)
PF04922.9	1	0	1	1	1	1	1	0	1	1.33333	DIE2/ALG10 family
PF13234.3	1	1	2	2	2	2	1	1	2	1.33333	rRNA-processing arch domain
PF09769.6	0	0	1	1	1	1	1	1	1	1.33333	Apolipoprotein O
PF04571.11	0	0	1	1	1	1	1	1	1	1.33333	lipin, N-terminal conserved region
PF14474.3	0	0	1	1	1	1	1	1	1	1.33333	RTC4-like domain
PF01300.15	1	0	1	1	1	1	0	1	1	1.33333	Telomere recombination
PF08508.7	0	0	1	1	1	1	1	1	1	1.33333	Fungal domain of unknown function (DUF1746)
PF09431.7	1	0	1	1	1	1	0	1	1	1.33333	Protein of unknown function (DUF2013)
PF07034.8	0	0	1	1	1	1	1	1	1	1.33333	Origin recognition complex (ORC) subunit 3 N-terminus
PF17147.1	1	0	1	0	1	1	1	1	1	1.33333	Pyruvate:ferredoxin oxidoreductase core domain II
PF16193.2	0	0	1	1	1	1	1	1	1	1.33333	AAA C-terminal domain
PF08146.9	1	1	0	1	1	1	0	1	1	1.33333	BP28CT (NUC211) domain
PF08621.7	1	0	1	1	1	1	1	0	1	1.33333	RPAP1-like, N-terminal
PF02045.12	0	1	1	1	1	1	1	0	1	1.33333	CCAAT-binding transcription factor (CBF-B/NF-YA) subunit B
PF09766.6	0	0	1	1	1	1	1	1	1	1.33333	Fms-interacting protein
PF15892.2	0	0	1	1	1	1	1	1	1	1.33333	BNR repeat-containing family member
PF00719.16	0	0	1	1	1	2	0	1	1	1.33333	Inorganic pyrophosphatase
PF12298.5	0	0	1	1	1	1	1	1	1	1.33333	Eukaryotic mitochondrial regulator protein
PF09447.7	0	1	1	1	1	1	0	1	1	1.33333	Cnl2/NKP2 family protein
PF03661.10	0	0	1	1	1	1	1	1	1	1.33333	Uncharacterised protein family (UPF0121)
PF00465.16	1	1	4	1	3	4	1	3	3	1.33333	Iron-containing alcohol dehydrogenase
PF03643.12	0	1	1	1	1	1	0	1	1	1.33333	Vacuolar protein sorting-associated protein 26
PF13638.3	0	0	1	1	1	1	1	1	1	1.33333	PIN domain
PF06201.10	0	1	2	2	2	2	1	2	2	1.33333	PITH domain
PF08755.8	1	0	2	1	2	2	2	2	2	1.33333	Hemimethylated DNA-binding protein YccV like
PF09468.7	1	0	1	1	1	1	0	1	1	1.33333	Ydr279p protein family (RNase H2 complex component)
PF11635.5	0	0	1	1	1	1	1	1	1	1.33333	Mediator complex subunit 16
PF00411.16	0	1	2	2	2	2	1	2	2	1.33333	Ribosomal protein S11
PF04840.9	0	1	1	1	1	1	0	1	1	1.33333	Vps16, C-terminal region
PF07741.10	1	0	1	1	1	1	0	1	1	1.33333	Brf1-like TBP-binding domain
PF00352.18	1	0	1	1	1	1	0	1	1	1.33333	Transcription factor TFIID (or TATA-binding protein, TBP)
PF10198.6	1	0	1	1	1	1	0	1	1	1.33333	Histone acetyltransferases subunit 3
PF10417.6	1	2	1	1	2	2	1	2	2	1.33333	C-terminal domain of 1-Cys peroxiredoxin
PF12254.5	0	1	1	1	1	1	0	1	1	1.33333	DNA polymerase alpha subunit p180 N terminal
PF13183.3	1	0	1	1	1	1	0	1	1	1.33333	4Fe-4S dicluster domain
PF01090.16	0	1	1	1	1	1	0	1	1	1.33333	Ribosomal protein S19e
PF09649.7	1	1	1	1	1	0	0	1	1	1.33333	Histone chaperone domain CHZ
PF00108.20	4	4	10	7	9	9	4	7	9	1.33333	Thiolase, N-terminal domain
PF11470.5	0	0	1	1	1	1	1	1	1	1.33333	TUG ubiquitin-like domain
PF08082.8	0	1	0	1	1	1	1	1	1	1.33333	PRO8NT (NUC069), PrP8 N-terminal domain
PF01878.15	1	0	1	1	1	1	0	1	1	1.33333	EVE domain
PF08689.7	1	0	1	1	1	1	0	1	1	1.33333	Mediator complex subunit Med5
PF01876.13	0	0	1	1	1	1	1	1	1	1.33333	RNase P subunit p30
PF10104.6	1	0	1	1	1	1	0	1	1	1.33333	Di-sulfide bridge nucleocytoplasmic transport domain
PF16573.2	0	1	1	1	1	1	0	1	1	1.33333	N-terminal beta-sandwich domain of polyadenylation factor
PF09751.6	1	1	1	1	1	1	0	0	1	1.33333	Nuclear protein Es2
PF05051.10	0	0	1	1	1	1	1	1	1	1.33333	Cytochrome C oxidase copper chaperone (COX17)
PF02926.14	1	0	1	1	1	1	1	0	1	1.33333	THUMP domain
PF04088.10	0	1	1	1	1	1	0	1	1	1.33333	Peroxin 13, N-terminal region
PF12761.4	0	1	1	1	1	1	0	1	1	1.33333	Actin cytoskeleton-regulatory complex protein END3
PF06212.9	1	0	1	1	1	1	0	1	1	1.33333	GRIM-19 protein
PF16988.2	0	1	1	1	1	1	1	0	1	1.33333	Vacuolar protein sorting 36 NZF-N zinc-finger domain
PF08016.9	1	0	0	2	1	0	1	1	1	1.33333	Polycystin cation channel
PF08650.7	1	1	1	1	1	1	0	0	1	1.33333	DASH complex subunit Dad4
PF16415.2	1	0	1	1	1	1	0	1	1	1.33333	CCR4-NOT transcription complex subunit 1 CAF1-binding domain
PF10311.6	1	0	1	1	1	1	0	1	1	1.33333	Increased loss of mitochondrial DNA protein 1
PF02637.15	1	0	1	1	1	1	0	1	1	1.33333	GatB domain
PF08920.7	0	1	1	1	1	1	0	1	1	1.33333	Splicing factor 3B subunit 1
PF16901.2	0	1	1	1	1	1	0	1	1	1.33333	C-terminal domain of alpha-glycerophosphate oxidase
PF07052.8	0	0	1	1	1	1	1	1	1	1.33333	Hepatocellular carcinoma-associated antigen 59
PF01177.19	0	1	2	0	1	1	0	1	1	1.33333	Asp/Glu/Hydantoin racemase
PF03208.16	1	0	1	1	1	1	0	1	1	1.33333	PRA1 family protein
PF01740.18	3	1	4	6	5	4	2	5	5	1.33333	STAS domain
PF08658.7	1	0	1	1	1	1	0	1	1	1.33333	Rad54 N terminal
PF05024.12	1	0	1	1	1	1	0	1	1	1.33333	N-acetylglucosaminyl transferase component (Gpi1)
PF05405.11	0	1	1	1	1	1	0	1	1	1.33333	Mitochondrial ATP synthase B chain precursor (ATP-synt_B)
PF08566.7	0	0	1	1	1	1	1	1	1	1.33333	Mitochondrial import protein Pam17
PF02005.13	0	1	1	1	1	0	1	1	1	1.33333	N2,N2-dimethylguanosine tRNA methyltransferase
PF00567.21	0	1	1	1	1	1	0	1	1	1.33333	Tudor domain
PF02598.14	0	0	1	1	1	1	2	0	1	1.33333	Putative RNA methyltransferase
PF10395.6	0	0	1	1	1	1	1	1	1	1.33333	Utp8 family
PF07500.11	1	0	2	2	2	2	1	2	2	1.33333	Transcription factor S-II (TFIIS), central domain
PF16909.2	1	0	1	1	1	0	1	1	1	1.33333	Vacuolar-sorting-associated 13 protein C-terminal
PF08066.9	1	0	1	1	1	1	0	1	1	1.33333	PMC2NT (NUC016) domain
PF06650.9	1	0	1	1	1	0	1	1	1	1.33333	SHR-binding domain of vacuolar-sorting associated protein 13
PF11597.5	1	0	1	1	1	1	1	0	1	1.33333	Mediator complex subunit 13 N-terminal
PF04939.9	0	0	1	1	1	1	1	1	1	1.33333	Ribosome biogenesis regulatory protein (RRS1)
PF10334.6	0	0	1	1	1	1	1	1	1	1.33333	Aromatic acid exporter family member 2
PF12542.5	0	0	1	1	1	1	1	1	1	1.33333	Pre-mRNA splicing factor
PF08227.8	0	1	1	1	1	1	1	0	1	1.33333	DASH complex subunit Hsk3 like
PF01000.23	1	1	2	2	2	2	0	2	2	1.33333	RNA polymerase Rpb3/RpoA insert domain
PF17050.2	1	1	0	1	1	0	1	1	1	1.33333	Altered inheritance of mitochondria 5
PF05592.8	2	6	4	2	6	3	4	9	6	1.33333	Bacterial alpha-L-rhamnosidase
PF00306.24	0	0	1	1	1	1	1	1	1	1.33333	ATP synthase alpha/beta chain, C terminal domain
PF07960.8	0	1	1	1	1	0	1	1	1	1.33333	CBP4
PF01784.15	1	0	1	1	1	1	0	1	1	1.33333	NIF3 (NGG1p interacting factor 3)
PF08229.8	1	0	1	1	1	1	0	1	1	1.33333	ER membrane protein SH3
PF06479.9	1	0	1	1	1	1	0	1	1	1.33333	Ribonuclease 2-5A
PF14611.3	0	1	1	1	1	1	0	1	1	1.33333	Mitochondrial inner-membrane-bound regulator
PF03870.12	0	1	1	1	1	1	0	1	1	1.33333	RNA polymerase Rpb8
PF01293.17	1	0	1	1	1	1	0	1	1	1.33333	Phosphoenolpyruvate carboxykinase
PF03874.13	1	1	2	2	2	2	0	2	2	1.33333	RNA polymerase Rpb4
PF14844.3	0	0	1	1	1	1	1	1	1	1.33333	PH domain associated with Beige/BEACH
PF04280.12	0	0	1	2	1	1	0	1	1	1.33333	Tim44-like domain
PF08118.8	0	1	1	1	1	1	0	1	1	1.33333	Yeast mitochondrial distribution and morphology (MDM) proteins
PF16414.2	1	0	1	1	1	1	0	1	1	1.33333	Niemann-Pick C1 N terminus
PF12848.4	2	1	2	3	3	2	2	3	3	1.33333	ABC transporter
PF03259.14	0	1	1	1	1	1	1	0	1	1.33333	Roadblock/LC7 domain
PF01641.15	1	0	1	1	1	1	0	1	1	1.33333	SelR domain
PF01265.14	2	0	2	2	2	2	0	2	2	1.33333	Cytochrome c/c1 heme lyase
PF08593.7	1	1	1	1	1	1	0	0	1	1.33333	Domain of unknown function
PF04446.9	2	0	1	1	1	0	0	1	1	1.33333	tRNAHis guanylyltransferase
PF06963.9	1	0	1	1	1	1	0	1	1	1.33333	Ferroportin1 (FPN1)
PF08772.8	1	0	1	1	1	1	0	1	1	1.33333	Nin one binding (NOB1) Zn-ribbon like
PF12014.5	1	0	1	1	1	1	0	1	1	1.33333	Domain of unknown function (DUF3506)
PF08649.7	1	0	1	1	1	1	0	1	1	1.33333	DASH complex subunit Dad1
PF04121.10	0	0	1	1	1	1	1	1	1	1.33333	Nuclear pore protein 84 / 107
PF07774.10	0	0	1	1	1	1	1	1	1	1.33333	Protein of unknown function (DUF1620)
PF08125.10	0	1	2	2	2	2	1	2	2	1.33333	Mannitol dehydrogenase C-terminal domain
PF05495.9	2	2	4	3	4	4	3	2	4	1.33333	CHY zinc finger
PF12349.5	2	0	3	3	3	3	1	3	3	1.33333	Sterol-sensing domain of SREBP cleavage-activation
PF07426.8	1	0	1	1	1	1	0	1	1	1.33333	Dynactin subunit p22
PF09435.7	0	1	1	1	1	1	0	1	1	1.33333	Fungal protein of unknown function (DUF2015)
PF08637.7	0	1	1	1	1	1	0	1	1	1.33333	ATP synthase regulation protein NCA2
PF04303.10	0	1	0	2	1	0	0	2	1	1.33333	PrpF protein
PF00162.16	0	1	1	1	1	1	0	1	1	1.33333	Phosphoglycerate kinase
PF13865.3	1	1	0	1	1	0	0	2	1	1.33333	C-terminal duplication domain of Friend of PRMT1
PF07885.13	1	0	1	1	1	1	0	1	1	1.33333	Ion channel
PF03669.10	0	1	1	1	1	1	0	1	1	1.33333	Uncharacterised protein family (UPF0139)
PF08144.8	0	0	1	1	1	1	1	1	1	1.33333	CPL (NUC119) domain
PF01431.18	0	0	1	1	1	1	1	1	1	1.33333	Peptidase family M13
PF14500.3	0	1	1	1	1	1	0	1	1	1.33333	Dos2-interacting transcription regulator of RNA-Pol-II
PF00574.20	1	0	1	1	1	1	0	1	1	1.33333	Clp protease
PF01016.16	1	0	1	1	1	1	0	1	1	1.33333	Ribosomal L27 protein
PF06703.8	0	1	1	1	1	1	0	1	1	1.33333	Microsomal signal peptidase 25 kDa subunit (SPC25)
PF12325.5	0	0	1	1	1	1	1	1	1	1.33333	TATA element modulatory factor 1 TATA binding
PF05343.11	0	1	1	0	1	2	0	1	1	1.33333	M42 glutamyl aminopeptidase
PF01267.14	1	0	1	1	1	1	0	1	1	1.33333	F-actin capping protein alpha subunit
PF06807.11	0	1	1	1	1	1	0	1	1	1.33333	Pre-mRNA cleavage complex II protein Clp1
PF02077.12	0	0	1	1	1	1	1	1	1	1.33333	SURF4 family
PF03051.12	0	1	1	1	1	1	0	1	1	1.33333	Peptidase C1-like family
PF01198.16	0	0	1	1	1	1	1	1	1	1.33333	Ribosomal protein L31e
PF12922.4	1	0	1	1	1	1	0	1	1	1.33333	non-SMC mitotic condensation complex subunit 1, N-term
PF05147.10	1	1	1	0	1	1	0	1	1	1.33333	Lanthionine synthetase C-like protein
PF09774.6	0	1	1	1	1	1	1	0	1	1.33333	Caffeine-induced death protein 2
PF13889.3	1	0	1	1	1	1	1	0	1	1.33333	Chromosome segregation during meiosis
PF01450.16	1	0	1	1	1	1	0	1	1	1.33333	Acetohydroxy acid isomeroreductase, catalytic domain
PF16206.2	1	0	1	0	1	1	1	1	1	1.33333	C-terminal region of Mon2 protein
PF08321.9	1	0	1	1	1	1	0	1	1	1.33333	PPP5 TPR repeat region
PF14538.3	0	1	1	1	1	1	0	1	1	1.33333	Raptor N-terminal CASPase like domain
PF07081.8	1	0	1	1	1	1	0	1	1	1.33333	Protein of unknown function (DUF1349)
PF07535.9	1	0	1	1	1	1	0	1	1	1.33333	DBF zinc finger
PF02678.13	1	0	2	2	2	2	1	2	2	1.33333	Pirin
PF10937.5	1	0	1	1	1	1	0	1	1	1.33333	Protein of unknown function (DUF2638)
PF14823.3	0	1	2	2	2	2	1	2	2	1.33333	Sirohaem biosynthesis protein C-terminal
PF10263.6	1	1	2	2	2	2	1	1	2	1.33333	SprT-like family
PF09531.7	0	0	1	1	1	1	1	1	1	1.33333	Nucleoporin protein Ndc1-Nup
PF01521.17	0	1	2	2	2	2	1	2	2	1.33333	Iron-sulphur cluster biosynthesis
PF09288.7	1	0	1	1	1	1	0	1	1	1.33333	Fungal ubiquitin-associated domain
PF10273.6	1	0	1	1	1	1	0	1	1	1.33333	Pre-rRNA-processing protein TSR2
PF12465.5	0	0	1	1	1	1	1	1	1	1.33333	Proteasome beta subunits C terminal
PF01150.14	1	1	2	2	2	2	0	2	2	1.33333	GDA1/CD39 (nucleoside phosphatase) family
PF11712.5	1	0	1	1	1	1	0	1	1	1.33333	Endoplasmic reticulum-based factor for assembly of V-ATPase
PF13241.3	0	1	2	2	2	2	1	2	2	1.33333	Putative NAD(P)-binding
PF10597.6	0	1	0	1	1	1	1	1	1	1.33333	U5-snRNA binding site 2 of PrP8
PF12513.5	0	1	1	1	1	1	0	1	1	1.33333	Mitochondrial degradasome RNA helicase subunit C terminal
PF10914.5	1	1	1	1	1	0	0	1	1	1.33333	Protein of unknown function (DUF2781)
PF01454.16	0	1	1	1	1	1	0	1	1	1.33333	MAGE family
PF05508.8	1	0	1	1	1	1	0	1	1	1.33333	RanGTP-binding protein
PF12813.4	1	1	0	1	1	1	1	0	1	1.33333	XPG domain containing
PF04882.9	0	1	1	1	1	1	0	1	1	1.33333	Peroxin-3
PF16417.2	1	0	1	1	1	1	0	1	1	1.33333	CCR4-NOT transcription complex subunit 1 TTP binding domain
PF09810.6	1	1	0	1	1	1	0	1	1	1.33333	Exonuclease V - a 5' deoxyribonuclease
PF08148.9	1	1	2	2	2	2	1	1	2	1.33333	DSHCT (NUC185) domain
PF05019.10	0	1	1	1	1	1	0	1	1	1.33333	Coenzyme Q (ubiquinone) biosynthesis protein Coq4
PF06032.9	0	2	0	1	2	1	3	3	2	1.33333	Protein of unknown function (DUF917)
PF03878.12	0	1	1	1	1	1	0	1	1	1.33333	YIF1
PF09130.8	1	0	1	1	1	1	0	1	1	1.33333	Domain of unknown function (DUF1932)
PF00314.14	0	1	1	1	1	1	1	0	1	1.33333	Thaumatin family
PF04031.10	1	1	1	1	1	0	0	1	1	1.33333	Las1-like
PF05291.8	0	1	1	1	1	1	0	1	1	1.33333	Bystin
PF14664.3	0	1	1	1	1	1	0	1	1	1.33333	Rapamycin-insensitive companion of mTOR, N-term
PF08578.7	0	0	1	1	1	1	1	1	1	1.33333	Protein of unknown function (DUF1765)
PF03194.12	1	0	1	1	1	1	0	1	1	1.33333	LUC7 N_terminus
PF01956.13	0	1	1	1	1	1	0	1	1	1.33333	Integral membrane protein DUF106
PF01247.15	1	0	1	1	1	1	0	1	1	1.33333	Ribosomal protein L35Ae
PF08145.9	0	0	1	1	1	1	1	1	1	1.33333	BOP1NT (NUC169) domain
PF12519.5	0	1	1	1	1	1	0	1	1	1.33333	Mitochondrial distribution and morphology protein 10
PF04627.10	1	0	1	1	1	1	0	1	1	1.33333	Mitochondrial ATP synthase epsilon chain
PF08519.9	0	1	1	1	1	1	0	1	1	1.33333	Replication factor RFC1 C terminal domain
PF13477.3	1	0	1	1	1	1	0	1	1	1.33333	Glycosyl transferase 4-like
PF10165.6	0	0	1	1	1	1	1	1	1	1.33333	Guanine nucleotide exchange factor synembryn
PF04495.11	1	0	1	1	1	1	0	1	1	1.33333	GRASP55/65 PDZ-like domain
PF11204.5	1	1	2	1	2	2	1	2	2	1.33333	Protein of unknown function (DUF2985)
PF00708.15	1	0	0	1	1	1	1	1	1	1.33333	Acylphosphatase
PF10329.6	0	0	1	1	1	1	1	1	1	1.33333	Region of unknown function (DUF2417)
PF00996.15	0	2	1	2	2	2	1	2	2	1.33333	GDP dissociation inhibitor
PF08574.7	0	1	1	1	1	1	0	1	1	1.33333	Protein of unknown function (DUF1762)
PF01588.17	0	0	1	1	1	1	1	1	1	1.33333	Putative tRNA binding domain
PF07063.10	0	1	1	1	1	1	0	1	1	1.33333	Domain of unknown function (DUF1338)
PF08701.8	0	0	1	1	1	1	1	1	1	1.33333	GNL3L/Grn1 putative GTPase
PF16717.2	0	0	1	1	1	1	1	1	1	1.33333	Ribosome-associated complex head domain
PF00855.14	0	0	1	1	1	1	1	1	1	1.33333	PWWP domain
PF01157.15	0	1	1	1	1	1	0	1	1	1.33333	Ribosomal protein L21e
PF11001.5	1	1	1	1	1	1	0	0	1	1.33333	Protein of unknown function (DUF2841)
PF13015.3	1	0	1	1	1	1	0	1	1	1.33333	Glucosidase II beta subunit-like protein
PF01974.14	1	1	2	2	2	1	1	2	2	1.33333	tRNA intron endonuclease, catalytic C-terminal domain
PF03998.10	0	0	1	1	1	1	1	1	1	1.33333	Utp11 protein
PF15412.3	0	0	1	1	1	1	1	1	1	1.33333	Binding domain of Nse4/EID3 to Nse3-MAGE
PF10275.6	0	0	1	1	1	1	1	1	1	1.33333	Peptidase C65 Otubain
PF10252.6	1	1	1	0	1	1	0	1	1	1.33333	Casein kinase substrate phosphoprotein PP28
PF17119.2	0	1	1	1	1	1	0	1	1	1.33333	Mitochondrial protein up-regulated during meiosis
PF01608.14	0	0	1	1	1	1	1	1	1	1.33333	I/LWEQ domain
PF09802.6	0	0	1	1	1	1	1	1	1	1.33333	Preprotein translocase subunit Sec66
PF02460.15	2	0	3	3	3	3	1	3	3	1.33333	Patched family
PF10384.6	0	0	1	1	1	1	1	1	1	1.33333	Centromere protein Scm3
PF01111.16	0	0	1	1	1	1	1	1	1	1.33333	Cyclin-dependent kinase regulatory subunit
PF06624.9	1	0	1	1	1	1	0	1	1	1.33333	Ribosome associated membrane protein RAMP4
PF09262.8	0	0	1	1	1	1	1	1	1	1.33333	Peroxisome biogenesis factor 1, N-terminal
PF16035.2	1	0	1	1	1	1	0	1	1	1.33333	Chalcone isomerase like
PF01779.14	1	1	1	1	1	0	1	0	1	1.33333	Ribosomal L29e protein family
PF03850.11	1	0	1	1	1	1	0	1	1	1.33333	Transcription factor Tfb4
PF01169.16	0	1	1	1	1	1	0	1	1	1.33333	Uncharacterized protein family UPF0016
PF13482.3	1	0	1	1	1	1	0	1	1	1.33333	RNase_H superfamily
PF07651.13	0	1	2	2	2	2	1	2	2	1.33333	ANTH domain
PF06842.9	1	1	0	1	1	0	1	1	1	1.33333	Protein of unknown function (DUF1242)
PF06058.10	1	0	1	1	1	1	0	1	1	1.33333	Dcp1-like decapping family
PF08288.9	1	0	1	1	1	1	0	1	1	1.33333	PIGA (GPI anchor biosynthesis)
PF08645.8	1	0	1	1	1	1	0	1	1	1.33333	Polynucleotide kinase 3 phosphatase
PF07304.8	0	1	1	1	1	1	0	1	1	1.33333	Steroid receptor RNA activator (SRA1)
PF01208.14	0	0	1	1	1	1	1	1	1	1.33333	Uroporphyrinogen decarboxylase (URO-D)
PF05871.9	1	0	1	1	1	1	0	1	1	1.33333	ESCRT-II complex subunit
PF11654.5	1	1	1	1	1	1	0	0	1	1.33333	Protein of unknown function (DUF2665)
PF05726.10	1	0	1	1	1	1	0	1	1	1.33333	Pirin C-terminal cupin domain
PF08651.7	1	0	1	1	1	1	0	1	1	1.33333	DASH complex subunit Duo1
PF12842.4	1	0	1	1	1	1	0	1	1	1.33333	Domain of unknown function (DUF3819)
PF02436.15	0	0	1	1	1	1	1	1	1	1.33333	Conserved carboxylase domain
PF12157.5	0	1	1	1	1	1	0	1	1	1.33333	Protein of unknown function (DUF3591)
PF08591.7	0	1	1	1	1	1	0	1	1	1.33333	Ribonucleotide reductase inhibitor
PF04143.11	0	1	1	1	1	1	0	1	1	1.33333	Sulphur transport
PF02602.12	1	0	1	1	1	1	0	1	1	1.33333	Uroporphyrinogen-III synthase HemD
PF07576.9	1	0	1	1	1	1	1	0	1	1.33333	BRCA1-associated protein 2
PF04884.11	1	0	1	1	1	1	0	1	1	1.33333	Vitamin B6 photo-protection and homoeostasis
PF03345.11	0	0	1	1	1	1	1	1	1	1.33333	Oligosaccharyltransferase 48 kDa subunit beta
PF08752.7	0	1	1	1	1	1	0	1	1	1.33333	Coatomer gamma subunit appendage platform subdomain
PF10531.6	1	0	1	1	1	1	0	1	1	1.33333	SLBB domain
PF08202.8	1	1	1	1	1	1	0	0	1	1.33333	Mis12-Mtw1 protein family
PF10017.6	1	1	0	1	1	1	0	1	1	1.33333	Histidine-specific methyltransferase, SAM-dependent
PF10300.6	0	1	1	1	1	1	0	1	1	1.33333	Protein of unknown function (DUF3808)
PF03733.10	0	0	1	1	1	1	1	1	1	1.33333	Inner membrane component domain
PF16727.2	0	0	1	1	1	1	1	1	1	1.33333	DNA repair protein REV1 C-terminal domain
PF05046.11	1	0	1	1	1	1	1	0	1	1.33333	Mitochondrial large subunit ribosomal protein (Img2)
PF07946.11	0	1	1	1	1	1	0	1	1	1.33333	Protein of unknown function (DUF1682)
PF10033.6	1	0	1	1	1	1	1	0	1	1.33333	Autophagy-related protein 13
PF12002.5	0	0	1	1	1	1	1	1	1	1.33333	MgsA AAA+ ATPase C terminal
PF11489.5	1	0	1	1	1	1	0	1	1	1.33333	Protein of unknown function (DUF3210)
PF14661.3	0	0	1	1	1	1	1	1	1	1.33333	HAUS augmin-like complex subunit 6 N-terminus
PF02990.13	0	1	2	2	2	2	1	2	2	1.33333	Endomembrane protein 70
PF02358.13	1	0	2	2	2	2	1	2	2	1.33333	Trehalose-phosphatase
PF01863.14	1	0	1	1	1	0	1	1	1	1.33333	Protein of unknown function DUF45
PF10270.6	0	0	1	1	1	1	1	1	1	1.33333	Membrane magnesium transporter
PF04064.10	0	1	1	1	1	1	0	1	1	1.33333	Domain of unknown function (DUF384)
PF04112.10	1	0	1	1	1	1	0	1	1	1.33333	Mak10 subunit, NatC N(alpha)-terminal acetyltransferase
PF10598.6	0	1	0	1	1	1	1	1	1	1.33333	RNA recognition motif of the spliceosomal PrP8
PF13867.3	0	1	1	0	1	1	1	1	1	1.33333	Sin3 binding region of histone deacetylase complex subunit SAP30
PF01191.16	0	0	1	1	1	1	1	1	1	1.33333	RNA polymerase Rpb5, C-terminal domain
PF01503.14	0	0	1	1	1	1	1	1	1	1.33333	Phosphoribosyl-ATP pyrophosphohydrolase
PF14663.3	0	1	1	1	1	1	0	1	1	1.33333	Rapamycin-insensitive companion of mTOR RasGEF_N domain
PF01808.15	0	0	1	1	1	1	1	1	1	1.33333	AICARFT/IMPCHase bienzyme
PF09597.7	1	0	1	1	1	1	0	1	1	1.33333	IGR protein motif
PF00231.16	1	0	1	1	1	1	0	1	1	1.33333	ATP synthase
PF08511.8	1	0	1	1	1	1	1	0	1	1.33333	COQ9
PF02187.14	1	1	1	1	1	1	0	0	1	1.33333	Growth-Arrest-Specific Protein 2 Domain
PF00677.14	0	0	1	1	1	1	1	1	1	1.33333	Lumazine binding domain
PF00290.17	0	0	1	1	1	1	1	1	1	1.33333	Tryptophan synthase alpha chain
PF03909.14	1	1	1	2	2	2	1	2	2	1.33333	BSD domain
PF10589.6	1	0	1	1	1	1	0	1	1	1.33333	NADH-ubiquinone oxidoreductase-F iron-sulfur binding region
PF13430.3	0	1	2	1	2	2	2	2	2	1.33333	Domain of unknown function (DUF4112)
PF09382.7	0	0	1	1	1	1	1	1	1	1.33333	RQC domain
PF03256.13	1	0	1	1	1	1	0	1	1	1.33333	Anaphase-promoting complex, subunit 10 (APC10)
PF05327.8	0	0	1	1	1	1	1	1	1	1.33333	RNA polymerase I specific transcription initiation factor RRN3
PF03660.11	1	0	1	1	1	1	0	1	1	1.33333	PHF5-like protein
PF13534.3	1	0	1	1	1	1	0	1	1	1.33333	4Fe-4S dicluster domain
PF02936.11	0	1	1	1	1	1	0	1	1	1.33333	Cytochrome c oxidase subunit IV
PF13902.3	0	1	0	1	1	1	1	1	1	1.33333	R3H-associated N-terminal domain
PF04056.11	1	1	2	2	2	2	0	2	2	1.33333	Ssl1-like
PF09282.7	0	0	1	1	1	1	1	1	1	1.33333	Mago binding
PF01491.13	1	0	1	1	1	1	0	1	1	1.33333	Frataxin-like domain
PF08325.7	1	2	3	3	3	2	2	2	3	1.33333	WLM domain
PF08690.7	0	1	1	1	1	1	0	1	1	1.33333	GET complex subunit GET2
PF05132.11	1	0	1	1	1	1	0	1	1	1.33333	RNA polymerase III RPC4
PF01301.16	1	4	6	0	5	6	4	4	5	1.33333	Glycosyl hydrolases family 35
PF08597.7	0	1	1	1	1	1	0	1	1	1.33333	Translation initiation factor eIF3 subunit
PF04054.12	1	0	1	1	1	1	0	1	1	1.33333	CCR4-Not complex component, Not1
PF01159.16	0	0	1	1	1	1	1	1	1	1.33333	Ribosomal protein L6e
PF03666.10	0	0	1	1	1	1	1	1	1	1.33333	Nitrogen Permease regulator of amino acid transport activity 3
PF12859.4	1	0	1	1	1	1	0	1	1	1.33333	Anaphase-promoting complex subunit 1
PF12999.4	1	0	1	1	1	1	0	1	1	1.33333	Glucosidase II beta subunit-like
PF12397.5	1	1	0	1	1	1	0	1	1	1.33333	U3 small nucleolar RNA-associated protein 10
PF07931.9	1	0	1	2	1	1	0	0	1	1.33333	Chloramphenicol phosphotransferase-like protein
PF03879.11	0	0	1	1	1	1	1	1	1	1.33333	Cgr1 family
PF06831.11	1	0	1	1	1	1	0	1	1	1.33333	Formamidopyrimidine-DNA glycosylase H2TH domain
PF10197.6	1	0	1	2	2	2	2	2	2	1.33333	N-terminal domain of CBF1 interacting co-repressor CIR
PF03676.11	0	1	1	1	1	1	1	0	1	1.33333	Uncharacterised protein family (UPF0183)
PF13883.3	0	1	1	1	1	0	1	1	1	1.33333	Pyridoxamine 5'-phosphate oxidase
PF05002.12	1	0	1	1	1	1	0	1	1	1.33333	SGS domain
PF17146.1	1	0	1	1	1	1	0	1	1	1.33333	PIN domain of ribonuclease
PF09814.6	0	1	1	1	1	1	0	1	1	1.33333	HECT-like Ubiquitin-conjugating enzyme (E2)-binding
PF08167.9	1	1	1	1	1	1	0	0	1	1.33333	rRNA processing/ribosome biogenesis
PF16418.2	1	0	1	1	1	1	0	1	1	1.33333	CCR4-NOT transcription complex subunit 1 HEAT repeat
PF14629.3	0	1	1	1	1	1	0	1	1	1.33333	Origin recognition complex (ORC) subunit 4 C-terminus
PF13127.3	1	0	1	1	1	1	0	1	1	1.33333	Protein of unknown function (DUF3955)
PF14413.3	2	0	1	1	1	0	0	1	1	1.33333	Thg1 C terminal domain
PF14791.3	1	0	2	2	2	2	2	1	2	1.33333	DNA polymerase beta thumb
PF06229.9	0	1	1	1	1	1	0	1	1	1.33333	FRG1-like domain
PF07890.9	1	0	1	1	1	1	0	1	1	1.33333	Rrp15p
PF06978.8	0	1	1	1	1	1	0	1	1	1.33333	Ribonucleases P/MRP protein subunit POP1
PF01920.17	2	0	4	4	4	4	2	4	4	1.33333	Prefoldin subunit
PF08101.8	0	0	1	1	1	1	1	1	1	1.33333	Domain of unknown function (DUF1708)
PF15341.3	0	0	1	1	1	1	1	1	1	1.33333	Ribosome biogenesis protein SLX9
PF14612.3	1	0	1	1	1	1	0	1	1	1.33333	IEC3 subunit of the Ino80 complex, chromatin re-modelling
PF03481.10	1	0	1	1	1	1	0	1	1	1.33333	Putative GTP-binding controlling metal-binding
PF03398.11	0	1	1	1	1	1	1	0	1	1.33333	Regulator of Vps4 activity in the MVB pathway
PF09753.6	1	1	1	1	1	0	0	1	1	1.33333	Membrane fusion protein Use1
PF08064.10	1	1	1	1	1	1	0	0	1	1.33333	UME (NUC010) domain
PF03908.10	0	0	1	1	1	1	1	1	1	1.33333	Sec20
PF08630.7	1	0	1	1	1	1	0	1	1	1.33333	Dfp1/Him1, central region
PF05189.10	0	0	1	1	1	1	1	1	1	1.33333	RNA 3'-terminal phosphate cyclase (RTC), insert domain
PF05817.11	1	0	1	1	1	1	0	1	1	1.33333	Oligosaccharyltransferase subunit Ribophorin II
PF08571.7	1	0	1	1	1	1	1	0	1	1.33333	Yos1-like
PF10262.6	1	1	0	1	1	0	1	1	1	1.33333	Rdx family
PF10236.6	0	0	1	1	1	1	1	1	1	1.33333	Mitochondrial ribosomal death-associated protein 3
PF16922.2	0	0	1	1	1	1	1	1	1	1.33333	DNA replication complex GINS protein SLD5 C-terminus
PF08083.8	0	1	0	1	1	1	1	1	1	1.33333	PROCN (NUC071) domain
PF09350.7	0	0	1	1	1	1	1	1	1	1.33333	Domain of unknown function (DUF1992)
PF08243.8	0	1	1	1	1	1	0	1	1	1.33333	SPT2 chromatin protein
PF04722.10	0	0	1	1	1	1	1	1	1	1.33333	Ssu72-like protein
PF04376.10	1	1	1	1	1	0	1	0	1	1.33333	Arginine-tRNA-protein transferase, N terminus
PF12400.5	0	0	1	1	1	1	1	1	1	1.33333	Vaculolar membrane protein
PF09749.6	0	0	1	1	1	1	1	1	1	1.33333	Uncharacterised conserved protein
PF12766.4	0	1	1	1	1	1	0	1	1	1.33333	Pyridoxamine 5'-phosphate oxidase
PF13019.3	0	1	1	1	1	1	0	1	1	1.33333	Telomere stability and silencing
PF05622.9	1	1	1	0	1	1	0	1	1	1.33333	HOOK protein
PF05837.9	1	0	1	1	1	1	0	1	1	1.33333	Centromere protein H (CENP-H)
PF01149.21	1	0	1	1	1	1	0	1	1	1.33333	Formamidopyrimidine-DNA glycosylase N-terminal domain
PF14824.3	0	1	2	2	2	2	1	2	2	1.33333	Sirohaem biosynthesis protein central
PF04841.10	0	1	1	1	1	1	0	1	1	1.33333	Vps16, N-terminal region
PF01126.17	0	0	1	1	1	1	1	1	1	1.33333	Heme oxygenase
PF09496.7	0	1	1	1	1	1	0	1	1	1.33333	Cenp-O kinetochore centromere component
PF00829.18	0	1	1	1	1	1	0	1	1	1.33333	Ribosomal prokaryotic L21 protein
PF11705.5	0	1	1	1	1	0	1	1	1	1.33333	DNA-directed RNA polymerase III subunit Rpc31
PF04991.10	0	1	2	1	2	2	2	2	2	1.33333	LicD family
PF07950.8	1	0	1	1	1	1	0	1	1	1.33333	Protein of unknown function (DUF1691)
PF11719.5	1	0	1	1	1	1	0	1	1	1.33333	DNA replication and checkpoint protein
PF08446.8	0	0	1	1	1	1	1	1	1	1.33333	PAS fold
PF11717.5	0	2	2	2	2	2	0	2	2	1.33333	RNA binding activity-knot of a chromodomain
PF13549.3	0	1	0	1	1	1	1	1	1	1.33333	ATP-grasp domain
PF02970.13	0	0	1	1	1	1	1	1	1	1.33333	Tubulin binding cofactor A
PF10312.6	0	0	1	1	1	1	1	1	1	1.33333	Conserved mid region of cactin
PF04080.10	0	0	1	1	1	1	1	1	1	1.33333	Per1-like
PF05486.9	0	1	0	1	1	1	1	1	1	1.33333	Signal recognition particle 9 kDa protein (SRP9)
PF02978.16	1	0	1	1	1	1	0	1	1	1.33333	Signal peptide binding domain
PF00590.17	0	1	2	2	2	2	1	2	2	1.33333	Tetrapyrrole (Corrin/Porphyrin) Methylases
PF10156.6	0	1	1	1	1	1	0	1	1	1.33333	Subunit 17 of Mediator complex
PF10392.6	1	0	1	1	1	1	0	1	1	1.33333	Golgi transport complex subunit 5
PF08294.8	0	1	1	1	1	1	0	1	1	1.33333	TIM21
PF05603.9	0	1	1	1	1	1	0	1	1	1.33333	Protein of unknown function (DUF775)
PF02138.15	0	0	1	1	1	1	1	1	1	1.33333	Beige/BEACH domain
PF14880.3	1	0	1	1	1	1	0	1	1	1.33333	Cytochrome oxidase c assembly
PF10173.6	0	1	1	1	1	1	0	1	1	1.33333	Mitochondrial K+-H+ exchange-related
PF01805.17	1	1	2	2	2	2	1	1	2	1.33333	Surp module
PF05649.10	0	0	1	1	1	1	1	1	1	1.33333	Peptidase family M13
PF10537.6	1	1	1	0	1	1	0	1	1	1.33333	ATP-utilising chromatin assembly and remodelling N-terminal
PF01115.14	0	0	1	1	1	1	1	1	1	1.33333	F-actin capping protein, beta subunit
PF03297.12	0	0	1	1	1	1	1	1	1	1.33333	S25 ribosomal protein
PF03291.13	1	0	1	1	1	1	0	1	1	1.33333	mRNA capping enzyme
PF07492.8	1	0	1	1	1	1	0	1	1	1.33333	Neutral trehalase Ca2+ binding domain
PF10397.6	0	0	1	1	1	1	0	2	1	1.33333	Adenylosuccinate lyase C-terminus
PF06824.8	1	1	3	4	5	3	3	4	4	1.33333	Protein of unknown function (DUF1237)
PF00549.16	1	2	3	4	5	4	1	4	4	1.33333	CoA-ligase
PF03099.16	1	0	2	1	3	2	1	2	2	1.33333	Biotin/lipoate A/B protein ligase family
PF05903.11	1	0	2	2	3	2	1	1	2	1.33333	PPPDE putative peptidase domain
PF11715.5	0	1	1	3	3	1	1	2	2	1.33333	Nucleoporin Nup120/160
PF04525.9	0	0	1	0	2	1	1	1	1	1.33333	LURP-one-related
PF03022.13	1	1	1	0	6	1	4	4	3	1.33333	Major royal jelly protein
PF01593.21	16	8	16	14	13	17	8	17	18	1.3211	Flavin containing amine oxidoreductase
PF07724.11	12	7	15	13	12	15	9	14	16	1.31959	AAA domain (Cdc48 subfamily)
PF08030.9	8	7	8	14	11	10	9	12	13	1.31646	Ferric reductase NAD binding domain
PF13639.3	21	15	22	23	25	21	15	10	25	1.31579	Ring finger domain
PF13245.3	10	3	13	11	7	10	9	10	12	1.31507	Part of AAA domain
PF04909.11	5	8	11	6	14	11	9	9	12	1.31507	Amidohydrolase
PF06687.9	7	7	9	8	10	10	7	9	11	1.31343	SUR7/PalI family
PF03959.10	4	7	9	11	10	12	6	8	11	1.31343	Serine hydrolase (FSH1)
PF03171.17	5	11	23	15	20	24	13	23	22	1.31343	2OG-Fe(II) oxygenase superfamily
PF00487.21	6	4	7	6	7	7	8	10	9	1.30909	Fatty acid desaturase
PF13419.3	6	3	9	6	12	9	3	7	9	1.30909	Haloacid dehalogenase-like hydrolase
PF04851.12	29	26	39	40	42	42	30	34	46	1.30496	Type III restriction enzyme, res subunit
PF13450.3	32	42	76	62	71	73	49	74	78	1.30271	NAD(P)-binding Rossmann-like domain
PF03807.14	4	3	7	7	5	5	6	6	7	1.30233	NADP oxidoreductase coenzyme F420-dependent
PF03129.17	7	1	6	6	6	6	5	6	7	1.30233	Anticodon binding domain
PF01055.23	6	3	6	6	6	6	4	6	7	1.30233	Glycosyl hydrolases family 31
PF01237.15	7	4	6	6	7	6	1	6	7	1.30233	Oxysterol-binding protein
PF00122.17	12	10	15	21	17	15	12	21	20	1.30081	E1-E2 ATPase
PF01794.16	6	8	9	13	10	11	11	12	13	1.3	Ferric reductase like transmembrane component
PF00173.25	16	17	20	21	19	22	13	26	25	1.2987	Cytochrome b5-like Heme/Steroid binding domain
PF05773.19	4	4	5	6	4	6	3	5	6	1.2973	RWD domain
PF00621.17	5	2	6	6	4	6	3	5	6	1.2973	RhoGEF domain
PF00160.18	7	8	10	10	10	10	8	11	12	1.2973	Cyclophilin type peptidyl-prolyl cis-trans isomerase/CLD
PF00690.23	5	6	8	13	9	8	7	12	11	1.29412	Cation transporter/ATPase, N-terminus
PF00170.18	7	6	10	9	10	10	5	11	11	1.29412	bZIP transcription factor
PF12894.4	6	6	11	10	10	10	4	11	11	1.29412	Anaphase-promoting complex subunit 4 WD40 domain
PF13606.3	18	16	26	30	36	26	22	24	32	1.29293	Ankyrin repeat
PF03727.13	3	2	5	4	4	5	2	6	5	1.29032	Hexokinase
PF02515.14	2	2	4	8	4	4	3	4	5	1.29032	CoA-transferase family III
PF01545.18	7	6	8	9	8	8	6	10	10	1.29032	Cation efflux family
PF01412.15	3	3	5	4	4	5	2	5	5	1.29032	Putative GTPase activating protein for Arf
PF02466.16	3	3	4	4	5	4	3	5	5	1.29032	Tim17/Tim22/Tim23/Pmp24 family
PF04828.11	6	9	14	7	15	15	12	15	15	1.29032	Glutathione-dependent formaldehyde-activating enzyme
PF00097.22	21	18	21	26	26	18	15	10	25	1.29032	Zinc finger, C3HC4 type (RING finger)
PF07859.10	19	24	33	34	34	34	38	45	42	1.28736	alpha/beta hydrolase fold
PF00082.19	10	15	17	28	15	17	19	22	23	1.28671	Subtilase family
PF01041.14	2	3	3	3	3	4	3	4	4	1.28	DegT/DnrJ/EryC1/StrS aminotransferase family
PF02148.16	3	1	3	4	3	4	3	4	4	1.28	Zn-finger in ubiquitin-hydrolases and other protein
PF07653.14	11	9	14	15	12	16	9	14	16	1.28	Variant SH3 domain
PF01424.19	4	1	4	4	3	4	1	4	4	1.28	R3H domain
PF01591.15	5	3	3	3	3	3	2	3	4	1.28	6-phosphofructo-2-kinase
PF03109.13	3	3	4	4	3	4	0	4	4	1.28	ABC1 family
PF00587.22	6	2	7	7	7	7	6	8	8	1.28	tRNA synthetase class II core domain (G, H, P, S and T)
PF00581.17	5	3	8	8	7	7	4	8	8	1.28	Rhodanese-like domain
PF03142.12	7	4	6	7	7	6	5	8	8	1.28	Chitin synthase
PF00702.23	13	14	25	28	26	25	14	30	28	1.28	haloacid dehalogenase-like hydrolase
PF00626.19	2	3	4	4	4	4	0	4	4	1.28	Gelsolin repeat
PF13813.3	1	0	5	3	4	4	5	3	4	1.28	Membrane bound O-acyl transferase family
PF01575.16	3	1	3	3	4	3	3	5	4	1.28	MaoC like domain
PF08282.9	3	4	7	8	8	8	3	9	8	1.28	haloacid dehalogenase-like hydrolase
PF00006.22	1	3	4	4	4	3	2	4	4	1.28	ATP synthase alpha/beta family, nucleotide-binding domain
PF00564.21	2	2	4	4	4	4	1	4	4	1.28	PB1 domain
PF10435.6	1	3	5	0	4	5	3	4	4	1.28	Beta-galactosidase, domain 2
PF11799.5	2	3	4	3	4	4	3	2	4	1.28	impB/mucB/samB family C-terminal domain
PF13363.3	1	3	5	0	4	5	3	4	4	1.28	Beta-galactosidase, domain 3
PF02171.14	3	2	3	4	4	3	3	3	4	1.28	Piwi domain
PF02146.14	4	4	6	9	10	6	5	6	8	1.28	Sir2 family
PF00266.16	9	10	13	13	13	14	7	15	15	1.2766	Aminotransferase class-V
PF02535.19	4	5	5	8	5	5	5	7	7	1.27273	ZIP Zinc transporter
PF01569.18	6	2	6	8	6	6	4	6	7	1.27273	PAP2 superfamily
PF08512.9	3	2	3	3	1	3	1	3	3	1.26316	Histone chaperone Rttp106-like
PF13832.3	3	2	3	2	1	3	2	3	3	1.26316	PHD-zinc-finger like domain
PF13771.3	3	2	3	2	1	3	2	3	3	1.26316	PHD-like zinc-binding domain
PF03127.11	4	1	3	3	2	3	1	2	3	1.26316	GAT domain
PF00355.23	3	3	5	5	4	5	7	6	6	1.26316	Rieske [2Fe-2S] domain
PF02777.15	4	1	2	3	2	2	2	3	3	1.26316	Iron/manganese superoxide dismutases, C-terminal domain
PF04253.12	0	2	2	4	2	2	3	4	3	1.26316	Transferrin receptor-like dimerisation domain
PF03914.14	2	2	3	3	2	3	1	3	3	1.26316	CBF/Mak21 family
PF04000.12	2	1	3	3	2	3	2	3	3	1.26316	Sas10/Utp3/C1D family
PF08530.7	2	2	2	3	2	3	3	2	3	1.26316	X-Pro dipeptidyl-peptidase C-terminal non-catalytic domain
PF02421.15	6	8	7	7	7	9	5	8	9	1.26316	Ferrous iron transport protein B
PF00132.21	9	2	9	7	7	9	5	9	9	1.26316	Bacterial transferase hexapeptide (six repeats)
PF16212.2	4	4	5	5	5	5	4	6	6	1.26316	Phospholipid-translocating P-type ATPase C-terminal
PF00795.19	10	6	10	7	11	11	9	12	12	1.26316	Carbon-nitrogen hydrolase
PF00175.18	7	8	17	18	18	17	11	18	18	1.26316	Oxidoreductase NAD-binding domain
PF07973.11	3	0	3	3	3	3	1	3	3	1.26316	Threonyl and Alanyl tRNA synthetase second additional domain
PF11815.5	2	1	3	3	3	3	1	3	3	1.26316	Domain of unknown function (DUF3336)
PF04560.17	2	2	3	3	3	3	0	3	3	1.26316	RNA polymerase Rpb2, domain 7
PF04563.12	2	2	3	3	3	3	0	3	3	1.26316	RNA polymerase beta subunit
PF00756.17	3	2	1	3	3	1	3	3	3	1.26316	Putative esterase
PF00773.16	1	1	3	3	3	3	2	3	3	1.26316	RNB domain
PF08700.8	3	1	3	3	3	3	0	3	3	1.26316	Vps51/Vps67
PF04565.13	2	2	3	3	3	3	0	3	3	1.26316	RNA polymerase Rpb2, domain 3
PF12783.4	1	2	3	3	3	2	2	3	3	1.26316	Guanine nucleotide exchange factor in Golgi transport N-terminal
PF00198.20	1	1	3	3	3	4	2	2	3	1.26316	2-oxoacid dehydrogenases acyltransferase (catalytic domain)
PF00445.15	0	2	3	2	3	3	3	3	3	1.26316	Ribonuclease T2 family
PF01120.14	0	2	3	4	3	3	1	3	3	1.26316	Alpha-L-fucosidase
PF04561.11	2	2	3	3	3	3	0	3	3	1.26316	RNA polymerase Rpb2, domain 2
PF07524.10	2	1	2	3	3	3	2	3	3	1.26316	Bromodomain associated
PF00982.18	2	0	3	3	3	3	2	3	3	1.26316	Glycosyltransferase family 20
PF02752.19	1	1	3	3	3	3	2	3	3	1.26316	Arrestin (or S-antigen), C-terminal domain
PF01112.15	3	1	2	3	3	2	2	3	3	1.26316	Asparaginase
PF10557.6	3	1	3	3	3	3	0	3	3	1.26316	Cullin protein neddylation domain
PF00562.25	2	2	3	3	3	3	0	3	3	1.26316	RNA polymerase Rpb2, domain 6
PF13091.3	5	3	6	4	6	6	4	4	6	1.26316	PLD-like domain
PF05686.9	4	4	5	5	8	5	1	6	6	1.26316	Glycosyl transferase family 90
PF01423.19	15	10	16	16	14	15	6	16	17	1.25926	LSM domain
PF00118.21	8	4	10	11	10	10	7	10	11	1.25714	TCP-1/cpn60 chaperonin family
PF00400.29	60	59	89	88	88	84	51	73	93	1.25676	WD domain, G-beta repeat
PF01135.16	2	5	6	12	6	9	4	7	8	1.2549	Protein-L-isoaspartate(D-aspartate) O-methyltransferase (PCMT)
PF00454.24	6	4	7	8	8	7	3	8	8	1.2549	Phosphatidylinositol 3- and 4-kinase
PF00271.28	53	48	76	75	77	79	55	73	84	1.25373	Helicase conserved C-terminal domain
PF13414.3	3	2	5	5	4	4	3	6	5	1.25	TPR repeat
PF12717.4	4	2	4	5	4	5	3	5	5	1.25	non-SMC mitotic condensation complex subunit 1
PF08501.8	4	6	4	4	4	4	2	4	5	1.25	Shikimate dehydrogenase substrate binding domain
PF00498.23	6	7	9	9	8	11	6	8	10	1.25	FHA domain
PF03765.12	4	3	4	5	4	4	3	5	5	1.25	CRAL/TRIO, N-terminal domain
PF00648.18	5	4	2	5	4	3	3	6	5	1.25	Calpain family cysteine protease
PF13621.3	5	2	4	5	5	5	3	3	5	1.25	Cupin-like domain
PF05188.14	3	2	5	5	5	5	3	4	5	1.25	MutS domain II
PF04479.10	5	5	8	7	14	8	8	9	10	1.25	RTA1 like protein
PF01968.15	2	3	4	2	8	5	3	5	5	1.25	Hydantoinase/oxoprolinase
PF00975.17	1	4	8	7	6	8	5	6	7	1.24444	Thioesterase domain
PF01209.15	11	16	27	26	27	28	19	26	28	1.24444	ubiE/COQ5 methyltransferase family
PF00176.20	23	20	25	25	30	26	20	24	30	1.24352	SNF2 family N-terminal domain
PF14604.3	12	9	14	15	12	15	12	14	16	1.24272	Variant SH3 domain
PF00890.21	18	16	28	25	27	29	18	26	29	1.24064	FAD binding domain
PF13246.3	7	8	10	15	10	10	10	14	13	1.2381	Cation transport ATPase (P-type)
PF13460.3	17	23	37	28	36	38	26	47	39	1.2381	NAD(P)H-binding
PF00753.24	12	6	12	8	16	10	7	13	13	1.2381	Metallo-beta-lactamase superfamily
PF04410.11	2	1	2	2	0	2	2	2	2	1.23077	Gar1/Naf1 RNA binding region
PF02213.13	1	1	2	2	1	2	2	2	2	1.23077	GYF domain
PF13455.3	1	3	2	1	1	2	1	2	2	1.23077	Meiotically up-regulated gene 113
PF10544.6	1	3	2	1	1	2	1	2	2	1.23077	T5orf172 domain
PF01571.18	1	2	1	3	1	1	1	3	2	1.23077	Aminomethyltransferase folate-binding domain
PF01778.14	1	2	2	2	1	2	1	2	2	1.23077	Ribosomal L28e protein family
PF16923.2	2	0	2	2	1	2	2	2	2	1.23077	Glycosyl hydrolase family 63 N-terminal domain
PF02375.14	2	2	2	1	1	2	1	2	2	1.23077	jmjN domain
PF00081.19	3	1	1	2	1	1	2	2	2	1.23077	Iron/manganese superoxide dismutases, alpha-hairpin domain
PF04099.9	3	1	2	2	1	2	0	2	2	1.23077	Sybindin-like family
PF09532.7	2	1	2	2	1	2	1	2	2	1.23077	FDF domain
PF00790.16	4	1	4	4	2	4	3	4	4	1.23077	VHS domain
PF11274.5	1	1	2	2	1	2	2	2	2	1.23077	Protein of unknown function (DUF3074)
PF13917.3	3	2	1	1	1	2	1	2	2	1.23077	Zinc knuckle
PF01161.17	3	4	5	8	4	5	3	7	6	1.23077	Phosphatidylethanolamine-binding protein
PF00300.19	9	8	12	9	9	13	7	11	12	1.23077	Histidine phosphatase superfamily (branch 1)
PF11969.5	3	2	4	3	3	4	3	4	4	1.23077	Scavenger mRNA decapping enzyme C-term binding
PF08447.9	8	4	5	5	5	5	4	3	6	1.23077	PAS fold
PF00724.17	2	5	8	4	7	10	7	9	8	1.23077	NADH:flavin oxidoreductase / NADH oxidase family
PF04855.9	2	0	2	2	2	2	1	2	2	1.23077	SNF5 / SMARCB1 / INI1
PF06999.9	2	0	2	2	2	2	1	2	2	1.23077	Sucrase/ferredoxin-like
PF07738.10	2	2	2	1	2	2	1	1	2	1.23077	Sad1 / UNC-like C-terminal
PF08797.8	1	2	2	2	2	2	1	1	2	1.23077	HIRAN domain
PF13177.3	1	3	4	4	4	4	2	4	4	1.23077	DNA polymerase III, delta subunit
PF00177.18	1	0	2	2	2	3	1	2	2	1.23077	Ribosomal protein S7p/S5e
PF08506.7	1	2	2	2	2	2	0	2	2	1.23077	Cse1
PF03463.12	2	2	1	2	2	2	0	2	2	1.23077	eRF1 domain 1
PF02996.14	1	0	2	2	2	2	2	2	2	1.23077	Prefoldin subunit
PF01704.15	0	1	2	2	2	2	2	2	2	1.23077	UTP--glucose-1-phosphate uridylyltransferase
PF11789.5	1	1	2	2	2	2	1	2	2	1.23077	Zinc-finger of the MIZ type in Nse subunit
PF04083.13	0	1	2	2	2	2	2	2	2	1.23077	Partial alpha/beta-hydrolase lipase region
PF03465.12	2	2	1	2	2	2	0	2	2	1.23077	eRF1 domain 3
PF01380.19	2	1	2	2	2	2	0	2	2	1.23077	SIS domain
PF03368.11	1	2	2	2	2	2	2	0	2	1.23077	Dicer dimerisation domain
PF05670.10	1	1	2	2	2	2	1	2	2	1.23077	Domain of unknown function (DUF814)
PF00463.18	2	3	4	2	4	4	2	5	4	1.23077	Isocitrate lyase family
PF03095.12	1	0	2	2	2	2	2	2	2	1.23077	Phosphotyrosyl phosphate activator (PTPA) protein
PF00238.16	0	2	2	2	2	2	1	2	2	1.23077	Ribosomal protein L14p/L23e
PF10404.6	2	1	2	1	2	2	1	2	2	1.23077	Rad4 beta-hairpin domain 2
PF14260.3	1	1	2	1	2	2	2	2	2	1.23077	C4-type zinc-finger of DNA polymerase delta
PF09248.7	1	2	2	1	2	2	2	1	2	1.23077	Domain of unknown function (DUF1965)
PF13850.3	1	1	2	2	2	2	1	2	2	1.23077	Endoplasmic Reticulum-Golgi Intermediate Compartment (ERGIC)
PF01849.15	0	2	2	2	2	2	1	2	2	1.23077	NAC domain
PF00924.15	1	1	2	3	2	2	0	2	2	1.23077	Mechanosensitive ion channel
PF00920.18	1	3	4	3	4	4	3	4	4	1.23077	Dehydratase family
PF00579.22	3	1	4	4	4	4	2	4	4	1.23077	tRNA synthetases class I (W and Y)
PF10391.6	1	0	2	2	2	2	2	2	2	1.23077	Fingers domain of DNA polymerase lambda
PF07915.10	1	1	2	2	2	2	1	2	2	1.23077	Glucosidase II beta subunit-like protein
PF05222.12	1	1	2	2	2	2	1	2	2	1.23077	Alanine dehydrogenase/PNT, N-terminal domain
PF04777.10	2	0	2	2	2	2	1	2	2	1.23077	Erv1 / Alr family
PF05277.9	1	3	4	3	4	4	3	4	4	1.23077	Protein of unknown function (DUF726)
PF06220.9	2	1	1	2	2	2	1	2	2	1.23077	U1 zinc finger
PF02833.11	0	2	2	1	2	2	2	2	2	1.23077	DHHA2 domain
PF02746.13	1	1	2	2	2	2	1	2	2	1.23077	Mandelate racemase / muconate lactonizing enzyme, N-terminal domain
PF00572.15	2	1	2	2	2	2	0	2	2	1.23077	Ribosomal protein L13
PF14792.3	1	0	2	2	2	2	2	2	2	1.23077	DNA polymerase beta palm
PF09811.6	1	2	1	2	2	2	1	2	2	1.23077	Essential protein Yae1, N terminal
PF06472.12	1	1	2	2	2	2	1	2	2	1.23077	ABC transporter transmembrane region 2
PF00158.23	1	2	1	1	2	1	1	4	2	1.23077	Sigma-54 interaction domain
PF02110.12	1	1	2	1	2	2	2	2	2	1.23077	Hydroxyethylthiazole kinase family
PF04588.10	1	1	2	2	2	2	1	2	2	1.23077	Hypoxia induced protein conserved region
PF05191.11	1	1	2	2	2	2	1	2	2	1.23077	Adenylate kinase, active site lid
PF13237.3	3	0	2	2	2	2	0	2	2	1.23077	4Fe-4S dicluster domain
PF06428.8	1	1	2	2	2	2	1	2	2	1.23077	GDP/GTP exchange factor Sec2p
PF10568.6	2	1	2	2	2	2	1	1	2	1.23077	Outer mitochondrial membrane transport complex protein
PF00297.19	0	2	2	2	2	2	1	2	2	1.23077	Ribosomal protein L3
PF02881.16	2	1	2	2	2	2	0	2	2	1.23077	SRP54-type protein, helical bundle domain
PF08156.10	2	0	2	2	2	2	1	2	2	1.23077	NOP5NT (NUC127) domain
PF10403.6	2	1	2	1	2	2	1	2	2	1.23077	Rad4 beta-hairpin domain 1
PF16213.2	1	1	2	2	2	2	1	2	2	1.23077	Dimerisation and cyclophilin-binding domain of Mon2
PF02201.15	2	1	2	2	2	2	0	2	2	1.23077	SWIB/MDM2 domain
PF04030.11	0	2	2	2	2	1	2	2	2	1.23077	D-arabinono-1,4-lactone oxidase
PF00673.18	1	1	2	2	2	2	1	2	2	1.23077	ribosomal L5P family C-terminus
PF00327.17	0	2	1	2	2	2	2	2	2	1.23077	Ribosomal protein L30p/L7e
PF01656.20	3	3	4	4	4	4	1	3	4	1.23077	CobQ/CobB/MinD/ParA nucleotide binding domain
PF12396.5	0	3	2	2	2	2	1	1	2	1.23077	Protein of unknown function (DUF3659)
PF01214.15	2	0	2	2	2	2	1	2	2	1.23077	Casein kinase II regulatory subunit
PF03464.12	2	2	1	2	2	2	0	2	2	1.23077	eRF1 domain 2
PF09140.8	2	1	2	1	2	2	1	2	2	1.23077	ATPase MipZ
PF01253.19	0	1	2	2	2	2	2	2	2	1.23077	Translation initiation factor SUI1
PF00111.24	4	3	3	3	4	4	2	3	4	1.23077	2Fe-2S iron-sulfur cluster binding domain
PF14551.3	2	4	6	6	6	6	3	6	6	1.23077	MCM N-terminal domain
PF08590.7	2	0	2	2	2	2	1	2	2	1.23077	Domain of unknown function (DUF1771)
PF07685.11	1	1	2	2	2	2	1	2	2	1.23077	CobB/CobQ-like glutamine amidotransferase domain
PF00569.14	3	3	4	4	4	4	1	3	4	1.23077	Zinc finger, ZZ type
PF13603.3	1	1	2	2	2	2	1	2	2	1.23077	Leucyl-tRNA synthetase, Domain 2
PF15411.3	2	1	2	2	2	2	0	2	2	1.23077	Pleckstrin homology domain
PF14382.3	2	2	2	2	2	1	0	2	2	1.23077	Exosome complex exonuclease RRP4 N-terminal region
PF15409.3	2	2	2	2	2	2	0	1	2	1.23077	Pleckstrin homology domain
PF04053.11	1	1	2	2	2	2	1	2	2	1.23077	Coatomer WD associated region
PF07798.8	1	1	2	2	2	2	1	2	2	1.23077	Protein of unknown function (DUF1640)
PF08265.8	1	2	2	2	2	2	0	2	2	1.23077	YL1 nuclear protein C-terminal domain
PF01176.16	0	2	2	2	2	2	2	1	2	1.23077	Translation initiation factor 1A / IF-1
PF01172.15	1	1	2	2	2	2	1	2	2	1.23077	Shwachman-Bodian-Diamond syndrome (SBDS) protein
PF07970.9	1	1	2	2	2	2	1	2	2	1.23077	Endoplasmic reticulum vesicle transporter
PF11051.5	1	2	4	4	4	5	1	5	4	1.23077	Mannosyltransferase putative
PF00493.20	2	4	6	6	6	6	3	6	6	1.23077	MCM2/3/5 family
PF01212.18	1	4	4	5	7	6	7	5	6	1.23077	Beta-eliminating lyase
PF07944.9	0	1	1	2	3	2	1	3	2	1.23077	Beta-L-arabinofuranosidase, GH127
PF00856.25	15	21	22	25	28	24	19	23	27	1.22034	SET domain
PF01979.17	10	6	18	9	17	17	11	17	16	1.21905	Amidohydrolase family
PF00168.27	9	9	13	14	10	12	10	15	14	1.21739	C2 domain
PF00642.21	7	3	8	6	7	7	4	4	7	1.21739	Zinc finger C-x8-C-x5-C-x3-H type (and similar)
PF00258.22	2	7	6	7	8	6	2	8	7	1.21739	Flavodoxin
PF00180.17	3	5	7	7	8	7	1	8	7	1.21739	Isocitrate/isopropylmalate dehydrogenase
PF08022.9	5	8	9	15	10	10	10	12	12	1.21519	FAD-binding domain
PF00566.15	7	7	12	12	11	12	6	12	12	1.21519	Rab-GTPase-TBC domain
PF14703.3	3	4	5	4	4	5	4	4	5	1.21212	Cytosolic domain of 10TM putative phosphate transporter
PF00616.16	7	2	4	4	4	4	4	4	5	1.21212	GTPase-activator protein for Ras-like GTPase
PF13589.3	3	4	5	5	4	5	2	5	5	1.21212	Histidine kinase-, DNA gyrase B-, and HSP90-like ATPase
PF13967.3	3	4	5	4	4	5	4	4	5	1.21212	Late exocytosis, associated with Golgi transport
PF00491.18	4	4	6	4	4	5	2	4	5	1.21212	Arginase family
PF00149.25	22	21	28	21	29	29	24	24	30	1.21212	Calcineurin-like phosphoesterase
PF04427.15	4	2	5	5	5	5	3	4	5	1.21212	Brix domain
PF01008.14	5	3	5	5	5	5	1	4	5	1.21212	Initiation factor 2 subunit family
PF01694.19	4	2	5	4	5	5	3	5	5	1.21212	Rhomboid family
PF00288.23	4	3	5	5	5	5	2	4	5	1.21212	GHMP kinases N terminal domain
PF13233.3	5	2	4	5	6	4	3	4	5	1.21212	Complex1_LYR-like
PF05378.10	2	3	4	2	8	5	3	6	5	1.21212	Hydantoinase/oxoprolinase N-terminal region
PF05496.9	9	7	16	16	16	16	9	17	16	1.20755	Holliday junction DNA helicase ruvB N-terminus
PF12171.5	7	4	7	10	8	7	4	6	8	1.20755	Zinc-finger double-stranded RNA-binding
PF00069.22	105	81	112	111	120	133	80	100	127	1.20665	Protein kinase domain
PF13602.3	13	25	31	26	38	35	28	43	36	1.20502	Zinc-binding dehydrogenase
PF04082.15	62	66	97	79	108	100	64	68	97	1.20497	Fungal specific transcription factor domain
PF00227.23	9	6	14	14	14	13	9	14	14	1.2043	Proteasome subunit
PF13964.3	1	3	3	6	1	3	1	2	3	1.2	Kelch motif
PF04003.9	1	3	3	3	2	2	3	3	3	1.2	Dip2/Utp12 Family
PF00725.19	3	2	3	2	2	3	2	3	3	1.2	3-hydroxyacyl-CoA dehydrogenase, C-terminal domain
PF01119.16	2	2	3	3	2	3	2	3	3	1.2	DNA mismatch repair protein, C-terminal domain
PF00780.19	3	2	3	3	2	3	1	3	3	1.2	CNH domain
PF01426.15	2	0	3	3	2	3	3	4	3	1.2	BAH domain
PF10348.6	2	1	3	3	2	3	3	3	3	1.2	Domain of unknown function (DUF2427)
PF00734.15	15	11	11	19	12	13	10	9	15	1.2	Fungal cellulose binding domain
PF01138.18	2	5	6	6	5	5	5	6	6	1.2	3' exoribonuclease family, domain 1
PF00179.23	15	10	20	19	20	20	16	20	21	1.2	Ubiquitin-conjugating enzyme
PF01644.14	2	2	2	3	3	2	3	3	3	1.2	Chitin synthase
PF01652.15	2	2	2	3	3	3	2	3	3	1.2	Eukaryotic initiation factor 4E
PF00614.19	2	2	3	3	3	3	2	2	3	1.2	Phospholipase D Active site motif
PF05192.15	4	2	6	6	6	6	4	6	6	1.2	MutS domain III
PF00551.16	2	1	3	2	3	3	3	3	3	1.2	Formyl transferase
PF03105.16	7	2	6	5	6	6	3	5	6	1.2	SPX domain
PF10609.6	2	2	3	3	3	3	1	3	3	1.2	NUBPL iron-transfer P-loop NTPase
PF02582.11	2	1	3	3	3	3	2	3	3	1.2	Uncharacterised ACR, YagE family COG1723
PF03828.16	3	2	3	3	3	3	1	2	3	1.2	Cid1 family poly A polymerase
PF08033.9	3	2	3	3	3	3	0	3	3	1.2	Sec23/Sec24 beta-sandwich domain
PF04810.12	3	2	3	3	3	3	0	3	3	1.2	Sec23/Sec24 zinc finger
PF02817.14	1	2	3	3	3	4	2	2	3	1.2	e3 binding domain
PF02190.13	1	3	3	3	3	3	2	2	3	1.2	ATP-dependent protease La (LON) substrate-binding domain
PF02803.15	4	3	6	6	6	6	3	6	6	1.2	Thiolase, C-terminal domain
PF13378.3	2	1	3	3	3	3	2	3	3	1.2	Enolase C-terminal domain-like
PF00472.17	3	2	3	2	3	3	1	3	3	1.2	RF-1 domain
PF00488.18	4	2	6	6	6	6	4	6	6	1.2	MutS domain V
PF00687.18	3	0	3	3	3	3	2	3	3	1.2	Ribosomal protein L1p/L10e family
PF01975.14	1	1	2	2	3	2	4	5	3	1.2	Survival protein SurE
PF05047.13	2	2	3	3	3	3	1	3	3	1.2	Mitochondrial ribosomal protein L51 / S25 / CI-B8 domain
PF01513.18	2	1	3	3	3	3	2	3	3	1.2	ATP-NAD kinase
PF04815.12	3	2	3	3	3	3	0	3	3	1.2	Sec23/Sec24 helical domain
PF08407.8	2	2	2	3	3	2	3	3	3	1.2	Chitin synthase N-terminal
PF04811.12	3	2	3	3	3	3	0	3	3	1.2	Sec23/Sec24 trunk domain
PF10277.6	2	0	4	2	4	4	1	3	3	1.2	Frag1/DRAM/Sfk1 family
PF03452.11	1	2	3	3	4	3	1	3	3	1.2	Anp1
PF01073.16	14	11	27	20	29	29	18	26	26	1.1954	3-beta hydroxysteroid dehydrogenase/isomerase family
PF08028.8	6	5	9	8	12	9	8	10	10	1.19403	Acyl-CoA dehydrogenase, C-terminal domain
PF13540.3	5	2	6	8	6	6	7	7	7	1.19149	Regulator of chromosome condensation (RCC1) repeat
PF00962.19	4	4	7	3	6	7	7	9	7	1.19149	Adenosine/AMP deaminase
PF00270.26	32	28	49	47	44	51	38	47	50	1.19048	DEAD/DEAH box helicase
PF00172.15	98	102	104	98	155	123	54	42	115	1.18557	Fungal Zn(2)-Cys(6) binuclear cluster domain
PF13893.3	1	2	4	3	2	5	4	6	4	1.18519	RNA recognition motif. (a.k.a. RRM, RBD, or RNP domain)
PF00689.18	4	5	6	11	6	6	5	11	8	1.18519	Cation transporting ATPase, C-terminus
PF01156.16	3	1	4	3	3	4	4	5	4	1.18519	Inosine-uridine preferring nucleoside hydrolase
PF16589.2	3	3	3	4	3	4	4	3	4	1.18519	BRCT domain, a BRCA1 C-terminus domain
PF05653.11	3	4	4	4	4	4	1	3	4	1.18519	Magnesium transporter NIPA
PF00091.22	4	2	4	4	4	4	1	4	4	1.18519	Tubulin/FtsZ family, GTPase domain
PF11754.5	3	3	4	4	4	4	2	3	4	1.18519	Velvet factor
PF00928.18	4	3	4	4	4	4	0	4	4	1.18519	Adaptor complexes medium subunit family
PF00102.24	1	1	5	4	4	5	3	4	4	1.18519	Protein-tyrosine phosphatase
PF11885.5	2	3	4	2	4	4	4	4	4	1.18519	Protein of unknown function (DUF3405)
PF01624.17	3	2	4	4	4	4	2	4	4	1.18519	MutS domain I
PF05916.8	3	1	4	4	4	4	3	4	4	1.18519	GINS complex protein
PF12706.4	5	2	3	5	4	2	2	4	4	1.18519	Beta-lactamase superfamily domain
PF04646.9	2	2	4	2	4	4	4	5	4	1.18519	Protein of unknown function, DUF604
PF03953.14	4	2	4	4	4	4	1	4	4	1.18519	Tubulin C-terminal domain
PF02780.17	2	2	4	4	5	5	2	3	4	1.18519	Transketolase, C-terminal domain
PF00888.19	3	2	4	4	5	4	1	4	4	1.18519	Cullin family
PF00620.24	10	4	9	8	9	9	4	8	9	1.18033	RhoGAP domain
PF02845.13	5	4	5	4	4	5	3	4	5	1.17647	CUE domain
PF02714.12	3	4	5	4	4	5	4	5	5	1.17647	Calcium-dependent channel, 7TM region, putative phosphate
PF01179.17	2	3	4	7	5	4	3	6	5	1.17647	Copper amine oxidase, enzyme domain
PF01066.18	6	3	5	5	5	4	2	4	5	1.17647	CDP-alcohol phosphatidyltransferase
PF08264.10	2	3	5	5	5	6	1	7	5	1.17647	Anticodon-binding domain of tRNA
PF01078.18	2	4	5	5	5	5	3	5	5	1.17647	Magnesium chelatase, subunit ChlI
PF13364.3	2	4	6	0	5	6	5	6	5	1.17647	Beta-galactosidase jelly roll domain
PF02458.12	1	3	13	11	13	15	7	5	10	1.17647	Transferase family
PF13410.3	6	9	13	8	9	12	7	11	11	1.17333	Glutathione S-transferase, C-terminal domain
PF13174.3	7	4	5	6	5	5	4	5	6	1.17073	Tetratricopeptide repeat
PF01553.18	5	4	5	6	6	5	4	6	6	1.17073	Acyltransferase
PF01529.17	3	5	5	6	6	6	6	4	6	1.17073	DHHC palmitoyltransferase
PF01546.25	8	6	10	12	12	11	10	13	12	1.17073	Peptidase family M20/M25/M40
PF05739.16	7	3	6	6	6	5	2	6	6	1.17073	SNARE domain
PF00999.18	5	3	5	7	6	5	4	6	6	1.17073	Sodium/hydrogen exchanger family
PF05368.10	13	19	31	26	33	31	24	35	31	1.16981	NmrA-like family
PF07714.14	97	71	102	102	110	119	67	93	111	1.16689	Protein tyrosine kinase
PF00294.21	7	5	6	7	6	6	5	6	7	1.16667	pfkB family carbohydrate kinase
PF13513.3	6	4	7	7	7	6	4	7	7	1.16667	HEAT-like repeat
PF08613.8	4	5	7	7	8	7	5	5	7	1.16667	Cyclin
PF00722.18	13	11	13	15	11	15	10	15	15	1.16505	Glycosyl hydrolases family 16
PF01753.15	5	8	8	8	7	8	4	7	8	1.16364	MYND finger
PF00439.22	6	5	7	8	8	7	5	9	8	1.16364	Bromodomain
PF00070.24	14	11	12	14	18	13	9	19	16	1.16364	Pyridine nucleotide-disulphide oxidoreductase
PF00328.19	3	6	7	10	9	7	6	7	8	1.16364	Histidine phosphatase superfamily (branch 2)
PF11951.5	12	21	25	34	34	21	23	23	28	1.16062	Fungal specific transcription factor domain
PF00153.24	32	20	37	37	36	37	32	38	39	1.15985	Mitochondrial carrier protein
PF00668.17	2	6	11	18	10	14	16	13	13	1.15556	Condensation domain
PF02181.20	1	1	1	1	0	1	1	1	1	1.14286	Formin Homology 2 Domain
PF01803.13	1	1	1	1	0	1	1	1	1	1.14286	LIM-domain binding protein
PF03439.10	1	1	1	1	0	1	1	1	1	1.14286	Early transcription elongation factor of RNA pol II, NGN section
PF04869.11	1	1	1	1	0	1	1	1	1	1.14286	Uso1 / p115 like vesicle tethering protein, head region
PF03239.11	1	1	1	1	0	1	1	1	1	1.14286	Iron permease FTR1 family
PF13892.3	2	0	1	1	0	1	1	1	1	1.14286	DNA-binding domain
PF02320.13	2	0	1	1	0	1	1	1	1	1.14286	Ubiquinol-cytochrome C reductase hinge protein
PF11942.5	1	1	1	1	0	1	1	1	1	1.14286	Spt5 transcription elongation factor, acidic N-terminal
PF08432.7	2	0	1	1	0	1	1	1	1	1.14286	AAA-ATPase Vps4-associated protein 1
PF06320.10	1	1	1	1	0	1	1	1	1	1.14286	GCN5-like protein 1 (GCN5L1)
PF12897.4	2	1	1	2	0	0	0	1	1	1.14286	Alanine-glyoxylate amino-transferase
PF14633.3	1	1	1	1	0	1	1	1	1	1.14286	SH2 domain
PF14635.3	1	1	1	1	0	1	1	1	1	1.14286	Helix-hairpin-helix motif
PF03101.12	3	1	2	3	0	2	2	1	2	1.14286	FAR1 DNA-binding domain
PF03980.11	1	1	1	1	0	1	1	1	1	1.14286	Nnf1
PF01758.13	1	1	0	2	0	1	1	1	1	1.14286	Sodium Bile acid symporter family
PF06658.9	1	1	1	1	0	1	1	1	1	1.14286	Protein of unknown function (DUF1168)
PF12815.4	1	1	1	1	0	1	1	1	1	1.14286	Spt5 C-terminal nonapeptide repeat binding Spt4
PF14878.3	1	1	1	1	0	1	1	1	1	1.14286	Death-like domain of SPT6
PF12932.4	3	1	1	1	0	1	0	0	1	1.14286	Vesicle coat trafficking protein Sec16 mid-region
PF05890.9	1	1	1	1	0	1	1	1	1	1.14286	Eukaryotic rRNA processing protein EBP2
PF14392.3	4	0	2	2	0	3	2	1	2	1.14286	Zinc knuckle
PF04065.12	2	1	1	1	0	1	0	1	1	1.14286	Not1 N-terminal domain, CCR4-Not complex component
PF14632.3	1	1	1	1	0	1	1	1	1	1.14286	Acidic N-terminal SPT6
PF04889.9	1	1	1	1	0	1	1	1	1	1.14286	Cwf15/Cwc15 cell cycle control protein
PF04548.13	0	0	2	1	0	2	1	1	1	1.14286	AIG1 family
PF07904.10	1	1	1	1	0	1	1	1	1	1.14286	Chromatin modification-related protein EAF7
PF05841.8	1	1	1	1	0	1	1	1	1	1.14286	Apc15p protein
PF14641.3	1	1	1	1	0	1	1	1	1	1.14286	Helix-turn-helix DNA-binding domain of SPT6
PF02682.13	0	1	1	1	0	1	1	2	1	1.14286	Allophanate hydrolase subunit 1
PF03126.15	1	1	1	1	0	1	1	1	1	1.14286	Plus-3 domain
PF00078.24	0	0	1	2	0	1	2	1	1	1.14286	Reverse transcriptase (RNA-dependent DNA polymerase)
PF05129.10	1	1	1	1	0	1	1	1	1	1.14286	Transcription elongation factor Elf1 like
PF09444.7	1	1	1	1	0	1	1	1	1	1.14286	MRC1-like domain
PF02626.12	0	1	1	1	0	1	1	2	1	1.14286	Allophanate hydrolase subunit 2
PF02940.12	1	1	1	1	0	1	1	1	1	1.14286	mRNA capping enzyme, beta chain
PF12253.5	1	1	1	1	0	1	1	1	1	1.14286	Chromatin assembly factor 1 subunit A
PF14639.3	1	1	1	1	0	1	1	1	1	1.14286	Holliday-junction resolvase-like of SPT6
PF08738.7	1	1	1	1	0	1	1	1	1	1.14286	Gon7 family
PF00130.19	1	2	2	2	1	2	2	2	2	1.14286	Phorbol esters/diacylglycerol binding domain (C1 domain)
PF15456.3	2	2	2	2	1	2	1	2	2	1.14286	Up-regulated During Septation
PF08799.8	3	1	2	2	1	2	1	2	2	1.14286	pre-mRNA processing factor 4 (PRP4) like
PF07722.10	2	0	3	2	1	3	2	1	2	1.14286	Peptidase C26
PF12998.4	3	1	2	2	1	2	1	2	2	1.14286	Inhibitor of growth proteins N-terminal histone-binding
PF00191.17	2	2	2	1	1	2	2	2	2	1.14286	Annexin
PF10455.6	3	1	2	2	1	2	1	2	2	1.14286	Bin/amphiphysin/Rvs domain for vesicular trafficking
PF10475.6	1	2	1	2	1	2	3	2	2	1.14286	Vacuolar-sorting protein 54, of GARP complex
PF01027.17	1	2	2	2	1	2	2	2	2	1.14286	Inhibitor of apoptosis-promoting Bax1
PF03200.13	3	1	3	3	2	3	3	3	3	1.14286	Glycosyl hydrolase family 63 C-terminal domain
PF03114.15	6	2	6	6	4	6	6	6	6	1.14286	BAR domain
PF00254.25	3	2	3	3	2	3	2	3	3	1.14286	FKBP-type peptidyl-prolyl cis-trans isomerase
PF00320.24	8	5	8	8	5	8	5	2	7	1.14286	GATA zinc finger
PF14602.3	4	1	5	3	3	4	3	5	4	1.14286	Hexapeptide repeat of succinyl-transferase
PF00610.18	3	3	4	4	3	4	3	4	4	1.14286	Domain found in Dishevelled, Egl-10, and Pleckstrin (DEP)
PF01230.20	3	2	4	4	3	4	4	4	4	1.14286	HIT domain
PF13454.3	2	2	3	5	3	5	3	5	4	1.14286	FAD-NAD(P)-binding
PF13350.3	2	2	4	6	3	4	3	4	4	1.14286	Tyrosine phosphatase family
PF00654.17	4	4	3	3	3	3	4	4	4	1.14286	Voltage gated chloride channel
PF00241.17	5	3	4	5	4	5	4	5	5	1.14286	Cofilin/tropomyosin-type actin-binding protein
PF04117.9	3	2	7	6	5	7	5	7	6	1.14286	Mpv17 / PMP22 family
PF01399.24	10	5	12	14	11	14	11	14	13	1.14286	PCI domain
PF13423.3	14	7	14	13	12	13	13	12	14	1.14286	Ubiquitin carboxyl-terminal hydrolase
PF02786.14	5	4	7	6	6	6	7	8	7	1.14286	Carbamoyl-phosphate synthase L chain, ATP binding domain
PF01585.20	4	4	8	8	6	8	3	8	7	1.14286	G-patch domain
PF00388.16	4	5	8	6	6	8	5	7	7	1.14286	Phosphatidylinositol-specific phospholipase C, X domain
PF00005.24	25	30	47	50	44	51	34	48	47	1.14286	ABC transporter
PF10297.6	1	0	1	1	1	1	1	1	1	1.14286	Minimal binding motif of Hap4 for binding to Hap2/3/5
PF14222.3	0	1	1	1	1	1	1	1	1	1.14286	Cell morphogenesis N-terminal
PF03403.10	1	2	4	2	3	4	0	5	3	1.14286	Platelet-activating factor acetylhydrolase, isoform II
PF00211.17	2	0	1	1	1	1	0	1	1	1.14286	Adenylate and Guanylate cyclase catalytic domain
PF00707.19	1	1	1	1	1	1	0	1	1	1.14286	Translation initiation factor IF-3, C-terminal domain
PF14288.3	1	1	1	1	1	1	0	1	1	1.14286	1,3-beta-glucan synthase subunit FKS1, domain-1
PF07919.9	1	0	1	1	1	1	1	1	1	1.14286	Gryzun, putative trafficking through Golgi
PF05182.10	0	1	1	1	1	1	1	1	1	1.14286	Fip1 motif
PF03849.11	1	0	1	1	1	1	1	1	1	1.14286	Transcription factor Tfb2
PF08084.8	0	1	1	1	1	1	1	1	1	1.14286	PROCT (NUC072) domain
PF10509.6	1	1	1	1	1	1	0	1	1	1.14286	Galactokinase galactose-binding signature
PF10559.6	1	1	1	1	1	1	0	1	1	1.14286	Plug domain of Sec61p
PF16508.2	1	1	1	1	1	1	0	1	1	1.14286	Second BRCT domain on Nijmegen syndrome breakage protein
PF16004.2	0	1	1	1	1	1	1	1	1	1.14286	116 kDa U5 small nuclear ribonucleoprotein component N-terminus
PF01747.14	0	1	1	1	1	1	1	1	1	1.14286	ATP-sulfurylase
PF04893.14	1	2	2	2	2	2	1	2	2	1.14286	Yip1 domain
PF08825.7	2	0	1	1	1	1	0	1	1	1.14286	E2 binding domain
PF12539.5	0	1	1	1	1	1	1	1	1	1.14286	Chromosome segregation protein Csm1/Pcs1
PF02290.12	1	0	1	1	1	1	1	1	1	1.14286	Signal recognition particle 14kD protein
PF00547.15	2	0	0	1	1	1	1	1	1	1.14286	Urease, gamma subunit
PF13691.3	1	0	1	1	1	1	1	1	1	1.14286	tRNase Z endonuclease
PF08234.9	1	1	1	1	1	1	0	1	1	1.14286	Chromosome segregation protein Spc25
PF09816.6	0	1	1	1	1	1	1	1	1	1.14286	RNA polymerase II transcription elongation factor
PF16495.2	0	1	1	1	1	1	1	1	1	1.14286	SWIRM-associated region 1
PF00448.19	4	2	3	3	3	3	0	3	3	1.14286	SRP54-type protein, GTPase domain
PF04566.10	2	2	2	2	2	2	0	2	2	1.14286	RNA polymerase Rpb2, domain 4
PF08712.8	1	1	1	1	1	1	0	1	1	1.14286	Scaffold protein Nfu/NifU N terminal
PF00364.19	4	5	8	8	8	9	6	8	8	1.14286	Biotin-requiring enzyme
PF12735.4	2	0	1	1	1	1	0	1	1	1.14286	TRAPP trafficking subunit Trs65
PF00476.17	1	0	1	1	1	1	1	1	1	1.14286	DNA polymerase family A
PF14636.3	0	1	1	1	1	1	1	1	1	1.14286	Folliculin-interacting protein N-terminus
PF01599.16	2	0	1	1	1	1	0	1	1	1.14286	Ribosomal protein S27a
PF03839.13	0	1	1	1	1	1	1	1	1	1.14286	Translocation protein Sec62
PF03847.10	1	0	1	1	1	1	1	1	1	1.14286	Transcription initiation factor TFIID subunit A
PF14228.3	0	1	1	1	1	1	1	1	1	1.14286	Cell morphogenesis central region
PF04667.14	1	1	1	1	1	1	0	1	1	1.14286	cAMP-regulated phosphoprotein/endosulfine conserved region
PF00742.16	1	0	1	1	1	1	1	1	1	1.14286	Homoserine dehydrogenase
PF08726.7	2	2	2	2	2	2	0	2	2	1.14286	Ca2+ insensitive EF hand
PF16399.2	0	1	1	1	1	1	1	1	1	1.14286	Intron-binding protein aquarius N-terminus
PF04515.9	2	1	2	2	2	2	1	2	2	1.14286	Plasma-membrane choline transporter
PF14306.3	0	1	1	1	1	1	1	1	1	1.14286	PUA-like domain
PF10261.6	1	1	1	1	1	1	0	1	1	1.14286	Inositol phospholipid synthesis and fat-storage-inducing TM
PF07955.8	0	1	1	1	1	1	1	1	1	1.14286	Protein of unknown function (DUF1687)
[truncated: 2,236 more rows]

## Sheet: secreted CAZyme
category	ocj	cpa	dam	dhe	mel	mgr	ncr	vma	vpy	ocj/rest
CE15|CBM1	1	0	0	0	0	0	0	0	0	#DIV/0!
CE2|CBM1	1	0	0	1	0	0	0	0	0	8
CBM32|CBM13	2	0	0	0	0	0	0	1	1	8
PL7	1	0	0	0	0	0	0	0	1	8
GH5|CBM23	1	0	0	0	1	0	0	0	0	8
CBM10|CBM2	1	0	0	0	1	0	0	0	1	4
GH103	1	0	1	1	0	0	0	0	0	4
GH27	3	2	0	1	0	1	0	1	1	4
GH6	2	0	1	0	0	2	1	0	0	4
GT71	1	0	0	0	0	1	0	1	0	4
CBM32|GH35	1	1	0	0	0	0	0	0	1	4
CBM9	1	0	1	0	0	1	0	0	0	4
GH64	2	1	0	0	0	0	0	2	2	3.2
GH131|CBM1	3	1	1	1	0	1	1	1	2	3
GH131	6	1	4	2	3	3	1	1	1	3
CBM12	18	6	13	8	7	8	2	3	4	2.82353
GT15	1	1	0	0	0	1	1	0	0	2.66667
CBM51	2	3	0	0	0	1	0	1	1	2.66667
PL9	1	0	1	2	0	0	0	0	0	2.66667
CE4|CBM18	2	0	0	0	0	4	1	1	0	2.66667
CBM2|CE3	1	0	1	0	1	0	0	1	0	2.66667
GH42	1	1	0	0	0	0	0	1	1	2.66667
GH67	2	0	0	1	1	1	1	1	1	2.66667
AA3|AA8	7	1	4	4	1	4	2	3	3	2.54545
CBM5	7	1	3	3	2	4	3	2	4	2.54545
AA2	7	1	6	4	6	2	0	2	1	2.54545
CBM20|GH15	5	5	0	2	2	3	1	2	1	2.5
GH105	2	0	0	3	1	2	0	1	0	2.28571
GH65	2	1	0	3	1	0	0	1	1	2.28571
CE5	19	11	10	11	11	15	1	4	4	2.26866
CE10	30	11	13	18	16	18	6	10	14	2.26415
GH75	5	3	2	3	3	4	3	0	0	2.22222
PL1	16	5	12	15	10	2	1	7	7	2.16949
GH37	1	0	1	0	1	0	1	0	1	2
GH10	4	1	3	4	2	3	2	1	0	2
GH74	1	1	0	0	0	0	0	1	2	2
GH105|GH28	1	1	0	1	1	0	0	1	0	2
CBM6|GH16	1	0	2	1	1	0	0	0	0	2
GH49	1	1	0	0	1	0	0	1	1	2
GH18|CBM1	2	2	0	1	2	1	0	1	1	2
CE16	5	3	2	2	3	2	1	5	3	1.90476
CBM2	4	0	4	4	3	5	0	1	0	1.88235
CE12	4	1	2	2	2	3	1	3	3	1.88235
AA3	18	4	10	18	13	10	2	11	9	1.87013
CBM20	7	2	4	6	4	5	4	3	2	1.86667
AA7	24	13	12	21	13	15	9	11	9	1.86408
GH30	5	3	4	3	5	0	2	2	3	1.81818
GH11	5	3	2	3	4	5	1	2	2	1.81818
GH5	12	5	11	13	9	6	1	4	4	1.81132
GH1	2	1	1	2	2	1	0	1	1	1.77778
GT14	2	3	1	1	1	1	0	1	1	1.77778
GH74|CBM1	2	1	2	2	1	1	1	1	0	1.77778
GT31	2	1	3	1	2	2	0	0	0	1.77778
AA1	13	11	5	5	7	12	10	5	5	1.73333
CE3	8	5	4	3	4	8	5	4	4	1.72973
GH53	3	2	4	1	2	1	1	1	2	1.71429
GH128	4	0	3	3	1	3	1	4	4	1.68421
PL3	5	0	7	7	4	1	1	2	2	1.66667
GH55	6	3	3	4	3	4	6	3	3	1.65517
GH28	16	12	11	14	10	3	2	15	12	1.62025
GH29	4	3	3	3	3	3	0	2	3	1.6
GH7|CBM1	2	1	1	2	1	1	1	1	2	1.6
GH114	1	0	0	1	1	1	0	1	1	1.6
GT76	1	0	1	1	1	0	0	1	1	1.6
GH72|CBM43	2	1	2	1	1	2	1	1	1	1.6
CE6	3	9	1	1	2	1	1	0	0	1.6
CBM32|AA5	1	0	1	2	0	1	1	0	0	1.6
GH71	1	1	0	0	0	1	1	2	0	1.6
GH51	2	1	2	1	2	1	1	1	1	1.6
GH47	7	3	4	6	4	5	3	5	5	1.6
CBM50	11	2	7	9	9	14	6	6	4	1.54386
GH3	17	12	12	13	10	13	5	11	13	1.52809
PL4	4	2	4	2	4	1	1	3	4	1.52381
CBM13	22	8	18	22	19	20	8	10	12	1.50427
CE8	5	4	5	2	3	1	2	5	5	1.48148
GT34	4	4	0	2	7	2	1	5	1	1.45455
CBM3	2	0	2	3	1	1	1	2	1	1.45455
GH79	4	2	3	5	2	2	2	3	4	1.3913
GT5	4	3	2	3	5	0	2	4	4	1.3913
GH31	3	1	2	2	3	1	4	2	3	1.33333
GT90	5	4	4	4	4	5	3	3	3	1.33333
AA9|CBM1	5	3	4	4	7	2	6	2	2	1.33333
GH54|CBM42	1	1	1	1	0	1	0	1	1	1.33333
GH95	1	1	1	1	2	0	0	0	1	1.33333
GH72	5	4	5	3	4	3	3	4	4	1.33333
CE5|CBM1	1	1	0	1	1	0	1	1	1	1.33333
GH5|CBM1	3	2	4	2	4	1	1	2	2	1.33333
GH2|CBM35|GH27	1	1	1	1	1	1	0	0	1	1.33333
AA5	2	1	0	1	2	3	4	0	1	1.33333
GH132	2	1	1	2	1	1	2	2	2	1.33333
GH63	2	0	2	2	1	1	2	2	2	1.33333
AA9	16	7	20	19	16	13	9	6	7	1.31959
GH76	9	6	8	8	10	5	6	6	6	1.30909
GH35	4	3	3	4	4	0	2	5	4	1.28
GH43	14	9	14	14	11	12	5	12	14	1.23077
GH92	5	6	3	5	7	2	1	4	5	1.21212
CBM24|GH71	3	2	1	3	6	0	4	3	1	1.2
GH12	4	4	3	4	2	3	1	5	5	1.18519
GH115	1	1	1	1	1	2	1	0	0	1.14286
CE16|CBM1	1	1	1	1	1	0	1	1	1	1.14286
CE15	1	2	1	2	1	0	1	0	0	1.14286
GT24	1	1	1	1	1	0	1	1	1	1.14286
CE1	6	2	5	8	9	9	5	2	3	1.11628
GH17	4	2	4	5	4	5	3	3	3	1.10345
GH20	2	2	1	3	1	3	2	1	2	1.06667
CBM1	8	6	9	12	10	11	10	1	2	1.04918
GH16	12	10	12	13	12	14	9	12	12	1.02128
CBM66|CBM35	1	1	1	1	1	0	0	2	2	1
CBM57	1	0	2	3	0	3	0	0	0	1
GH43|CBM35	2	2	2	4	3	2	1	1	1	1
GH6|CBM1	1	2	1	1	0	1	1	1	1	1
CBM32	3	6	1	3	4	3	1	3	4	0.96
GH18	8	4	8	13	7	5	11	10	9	0.955224
GH125	2	2	2	1	2	5	1	2	2	0.941176
GH106	1	2	1	1	0	1	0	2	2	0.888889
GH2	2	2	3	3	1	2	3	2	2	0.888889
GT66	1	1	1	1	1	1	2	1	1	0.888889
CBM50|GH18	1	0	2	1	2	0	0	2	2	0.888889
GH45	1	2	1	1	2	1	0	1	1	0.888889
CBM48	2	3	2	2	2	2	2	3	3	0.842105
GH7	3	4	4	5	5	4	3	3	1	0.827586
GT22	3	4	1	5	4	3	4	3	5	0.827586
CE4	1	0	1	1	1	5	2	1	0	0.727273
GT4	1	2	2	2	1	1	1	1	1	0.727273
GH16|CBM18	1	1	2	1	1	2	1	1	2	0.727273
GH78	2	5	3	5	3	2	2	2	1	0.695652
CBM18|GH18	2	1	3	4	5	4	1	3	2	0.695652
CBM63	1	1	2	2	1	2	0	2	2	0.666667
GT2	1	1	1	5	2	1	1	2	1	0.571429
GH93	1	1	3	3	4	1	1	1	1	0.533333
GH10|CBM1	1	2	1	2	4	3	1	2	3	0.444444
CBM18	1	0	1	3	2	13	1	0	0	0.4
GH32	1	2	4	4	2	6	2	2	2	0.333333
AA9|CBM18	0	0	0	0	0	1	0	0	0	0
GH62|CBM2	0	0	0	0	0	1	0	0	0	0
GH62|CBM1	0	0	0	0	0	1	0	0	0	0
GH19|CBM18	0	0	0	1	0	0	0	0	0	0
GH39	0	1	2	1	2	1	0	0	0	0
GH26|CBM35	0	0	1	1	0	0	0	0	0	0
GH33	0	0	0	0	0	1	0	0	0	0
GH36	0	0	1	0	1	0	0	0	0	0
CBM52	0	0	0	0	0	1	1	0	0	0
GT17	0	0	0	1	0	1	0	0	0	0
CBM50|CBM18|GH18	0	0	1	0	1	1	6	0	0	0
GH43|CBM42	0	0	0	0	0	1	1	0	0	0
GH68	0	0	0	0	0	1	0	0	0	0
CBM2|GH10	0	0	0	0	1	0	0	0	0	0
GT87	0	0	1	1	1	0	0	0	0	0
CBM48|CBM41	0	0	0	0	0	0	0	0	1	0
GH97|CBM13	0	0	0	0	1	0	0	0	0	0
GH23	0	1	0	0	0	0	0	0	0	0
GH26	0	1	0	0	0	0	1	1	1	0
GH25	0	0	0	0	0	0	1	0	0	0
GH24	0	1	0	0	0	1	0	0	0	0
CBM67	0	0	0	1	0	3	0	0	0	0
CE12|CE2	0	0	1	0	0	0	0	0	0	0
CBM66|CBM42|CE2	0	0	0	0	0	0	1	0	0	0
GH117	0	0	0	1	1	0	0	0	0	0
CBM51|GH97	0	0	0	0	1	0	0	0	0	0
CBM32|GH28	0	0	0	0	1	1	0	0	0	0
GH16|CBM4	0	0	0	0	1	0	0	1	0	0
GH70	0	0	0	0	0	1	0	1	0	0
GH16|CBM1	0	0	0	0	0	0	1	0	0	0
PL20	0	0	0	0	0	1	1	0	0	0
CBM48|GH13	0	0	0	0	0	2	0	1	1	0
CBM6|GH43	0	0	0	0	1	2	0	0	0	0
CE1|CBM1	0	0	0	1	1	0	0	0	0	0
AA3|AA8|CBM1	0	0	1	1	1	1	1	1	1	0
CE2	0	1	0	1	1	1	0	0	0	0
CBM2|CBM57	0	0	1	2	1	0	0	1	0	0
GT69	0	0	0	1	0	0	1	1	1	0
GT62	0	0	1	0	0	0	0	0	0	0
GH16|CBM13	0	0	0	1	0	0	0	0	0	0
CBM13|GH27	0	0	0	1	1	0	0	1	1	0
GT57	0	0	0	0	1	0	0	0	0	0
GT55	0	0	0	1	0	1	0	0	0	0
GH43|CBM13	0	1	0	0	0	0	0	0	0	0
GT1	0	0	1	0	1	0	0	0	0	0
CBM48|GH13|CBM34|CBM20	0	0	0	0	2	1	0	2	1	0
GH45|CBM1	0	0	0	0	1	0	1	1	0	0
CBM38|GH32	0	0	0	0	0	0	1	0	0	0
GH81	0	0	0	0	1	2	0	1	0	0
GH62	0	0	1	1	0	1	0	0	0	0
GT48	0	0	0	0	1	0	0	1	1	0
GH43|CBM61	0	1	0	0	0	0	0	0	0	0
GH43|CBM66	0	0	1	3	2	0	0	0	1	0
GH43|CBM32	0	0	0	1	0	0	0	0	0	0
CBM50|CBM18	0	0	0	0	0	0	1	0	0	0
CE11	0	0	0	1	0	0	0	0	0	0
CBM35	0	0	1	1	2	0	0	0	0	0
GH54	0	0	0	0	0	0	1	0	0	0
GT32	0	1	2	1	0	1	1	1	1	0
AA4	0	0	0	1	0	0	0	0	0	0
GH62|CBM13	0	0	0	0	1	1	0	0	0	0
GH11|CBM1	0	0	1	1	1	0	1	0	0	0
CBM18|AA5	0	0	0	0	0	1	0	0	0	0
GH43|GH35	0	0	0	1	1	0	0	1	0	0
GT25	0	0	0	1	0	0	0	0	0	0
GT20	0	0	0	0	0	0	0	1	1	0
CBM6	0	0	1	0	0	0	0	1	1	0
AA8	0	0	0	1	1	2	2	0	0	0
total	576	334	427	516	460	444	265	342	338
note: total number is slight smaller than adding all categories together since a handful of genes are classified in multiple categories at the same time.

## Sheet: kinase
pfam	ncr	mel	vpy	mgr	cpa	vma	dhe	dam	ocj	ratio	ratio	annot
PF02595.12	0	0	0	1	0	0	0	0	1	8	#DIV/0!	Glycerate kinase family
PF03881.11	0	7	7	4	3	7	8	5	29	5.65854	9.66667	Fructosamine kinase
PF02224.15	0	0	2	1	1	1	0	1	2	2.66667	2	Cytidylate kinase
PF02223.14	1	1	1	1	1	1	0	1	2	2.28571	2	Thymidylate kinase
PF00625.18	0	1	1	2	0	2	1	1	2	2	#DIV/0!	Guanylate kinase
PF03234.11	1	1	1	1	1	1	1	1	2	2	2	Cdc37 N terminal kinase binding
PF02958.17	0	2	4	2	4	4	4	4	6	2	1.5	Ecdysteroid kinase
PF00871.14	0	0	1	1	1	1	0	0	1	2	1	Acetokinase family
PF01633.17	3	3	4	3	4	5	4	3	7	1.93103	1.75	Choline/ethanolamine kinase
PF02816.15	1	2	0	2	0	0	2	2	2	1.77778	#DIV/0!	Alpha-kinase family
PF06391.10	0	0	1	1	1	1	0	1	1	1.6	1	CDK-activating kinase assembly factor MAT1
PF06293.11	3	5	7	8	9	6	6	7	10	1.56863	1.11111	Lipopolysaccharide kinase (Kdo/WaaP) family
PF00613.17	0	0	2	2	2	2	1	2	2	1.45455	1	Phosphoinositide 3-kinase family, accessory domain (PIK domain)
PF00512.22	10	8	11	9	9	12	9	11	14	1.41772	1.55556	His Kinase A (phospho-acceptor) domain
PF01202.19	3	4	5	4	5	5	2	6	6	1.41176	1.2	Shikimate kinase
PF00406.19	2	1	4	3	3	4	3	3	4	1.3913	1.33333	Adenylate kinase
PF02518.23	16	16	21	18	19	21	17	18	25	1.36986	1.31579	Histidine kinase-, DNA gyrase B-, and HSP90-like ATPase
PF04739.12	1	1	1	1	0	1	0	1	1	1.33333	#DIV/0!	5'-AMP-activated protein kinase beta subunit, interaction domain
PF00370.18	3	2	3	4	3	3	2	4	4	1.33333	1.33333	FGGY family of carbohydrate kinases, N-terminal domain
PF00349.18	3	2	5	4	4	5	2	5	5	1.33333	1.25	Hexokinase
PF08617.7	0	1	1	1	1	1	0	1	1	1.33333	1	Kinase binding protein CGI-121
PF10159.6	1	1	1	1	1	0	1	0	1	1.33333	1	Kinase phosphorylation protein
PF16797.2	0	1	1	1	1	1	0	1	1	1.33333	1	Fungal kinase associated-1 domain
PF00792.21	0	0	1	1	1	1	1	1	1	1.33333	1	Phosphoinositide 3-kinase C2
PF01293.17	1	0	1	1	1	1	0	1	1	1.33333	1	Phosphoenolpyruvate carboxykinase
PF00162.16	0	1	1	1	1	1	0	1	1	1.33333	1	Phosphoglycerate kinase
PF10252.6	1	1	1	0	1	1	0	1	1	1.33333	1	Casein kinase substrate phosphoprotein PP28
PF01111.16	0	0	1	1	1	1	1	1	1	1.33333	1	Cyclin-dependent kinase regulatory subunit
PF08645.8	1	0	1	1	1	1	0	1	1	1.33333	1	Polynucleotide kinase 3 phosphatase
PF03727.13	3	2	5	4	4	5	2	6	5	1.29032	1.25	Hexokinase
PF01591.15	5	3	3	3	3	3	2	3	4	1.28	1.33333	6-phosphofructo-2-kinase
PF00454.24	6	4	7	8	8	7	3	8	8	1.2549	1	Phosphatidylinositol 3- and 4-kinase
PF02110.12	1	1	2	1	2	2	2	2	2	1.23077	1	Hydroxyethylthiazole kinase family
PF05191.11	1	1	2	2	2	2	1	2	2	1.23077	1	Adenylate kinase, active site lid
PF01214.15	2	0	2	2	2	2	1	2	2	1.23077	1	Casein kinase II regulatory subunit
PF13589.3	3	4	5	5	4	5	2	5	5	1.21212	1.25	Histidine kinase-, DNA gyrase B-, and HSP90-like ATPase
PF00288.23	4	3	5	5	5	5	2	4	5	1.21212	1	GHMP kinases N terminal domain
PF00069.22	105	81	112	111	120	133	80	100	127	1.20665	1.05833	Protein kinase domain
PF01513.18	2	1	3	3	3	3	2	3	3	1.2	1	ATP-NAD kinase
PF07714.14	97	71	102	102	110	119	67	93	111	1.16689	1.00909	Protein tyrosine kinase
PF00294.21	7	5	6	7	6	6	5	6	7	1.16667	1.16667	pfkB family carbohydrate kinase
PF01504.15	2	1	3	3	3	3	3	3	3	1.14286	1	Phosphatidylinositol-4-phosphate 5-Kinase
PF02149.16	1	0	1	1	1	1	1	1	1	1.14286	1	Kinase associated domain 1
PF10509.6	1	1	1	1	1	1	0	1	1	1.14286	1	Galactokinase galactose-binding signature
PF10494.6	0	0	1	1	1	1	2	1	1	1.14286	1	Serine-threonine protein kinase 19
PF06090.9	1	1	1	1	1	1	0	1	1	1.14286	1	Inositol-pentakisphosphate 2-kinase
PF02887.13	2	0	0	1	1	2	0	1	1	1.14286	1	Pyruvate kinase, alpha/beta domain
PF03770.13	3	2	2	2	2	1	0	2	2	1.14286	1	Inositol polyphosphate kinase
PF16579.2	1	1	1	0	1	1	1	1	1	1.14286	1	Adenylate sensor of SNF1-like protein kinase
PF01583.17	1	1	4	2	3	3	2	5	3	1.14286	1	Adenylylsulphate kinase
PF00224.18	2	0	0	1	1	2	0	1	1	1.14286	1	Pyruvate kinase, barrel domain
PF01121.17	1	1	1	1	1	1	0	1	1	1.14286	1	Dephospho-CoA kinase
PF00365.17	0	1	1	1	1	1	1	1	1	1.14286	1	Phosphofructokinase
PF01288.17	1	1	1	1	1	1	0	1	1	1.14286	1	7,8-dihydro-6-hydroxymethylpterin-pyrophosphokinase (HPPK)
PF01256.14	0	0	1	1	1	1	2	1	1	1.14286	1	Carbohydrate kinase
PF02782.13	5	2	3	5	3	3	3	5	4	1.10345	1.33333	FGGY family of carbohydrate kinases, C-terminal domain
PF00781.21	2	2	2	2	2	1	2	2	2	1.06667	1	Diacylglycerol kinase catalytic domain
PF08543.9	3	1	2	2	2	2	1	2	2	1.06667	1	Phosphomethylpyrimidine kinase
PF00696.25	4	2	3	3	3	4	1	3	3	1.04348	1	Amino acid kinase family
PF10436.6	2	3	3	3	4	3	2	3	3	1.04348	0.75	Mitochondrial branched-chain alpha-ketoacid dehydrogenase kinase
PF08477.10	31	26	34	32	36	36	17	35	32	1.03644	0.888889	Ras of Complex, Roc, domain of DAPkinase
PF16561.2	2	2	3	2	1	3	1	2	2	1	2	Glycogen recognition site of AMP-activated protein kinase
PF12243.5	1	1	1	1	1	1	1	1	1	1	1	CTD kinase subunit gamma CTK3
PF00334.16	1	1	1	1	1	1	1	1	1	1	1	Nucleoside diphosphate kinase
PF04263.13	1	1	1	1	1	1	1	1	1	1	1	Thiamin pyrophosphokinase, catalytic domain
PF04265.11	1	1	1	1	1	1	1	1	1	1	1	Thiamin pyrophosphokinase, vitamin B1 binding domain
PF11522.5	1	1	1	1	1	1	1	1	1	1	1	Yeast phosphatidylinositol-4-OH kinase Pik1
PF08303.8	1	1	1	1	1	1	1	1	1	1	1	tRNA ligase kinase domain
PF12350.5	1	1	1	1	1	1	1	1	1	1	1	CTD kinase subunit gamma CTK3 C-terminus
PF13793.3	6	3	3	3	3	3	2	3	3	0.923077	1	N-terminal domain of ribose phosphate pyrophosphokinase
PF08544.10	3	3	4	4	4	4	2	4	3	0.857143	0.75	GHMP kinases C terminal
PF14531.3	16	12	18	20	19	18	9	20	14	0.848485	0.736842	Kinase-like
PF04428.11	3	1	1	1	1	1	1	1	1	0.8	1	Choline kinase N terminus
PF00485.15	2	1	1	2	1	1	0	2	1	0.8	1	Phosphoribulokinase / Uridine kinase family
PF01687.14	2	0	1	2	1	1	2	2	1	0.727273	1	Riboflavin kinase
PF00433.21	2	2	3	5	3	4	4	4	2	0.592593	0.666667	Protein kinase C terminal domain
PF04275.11	0	1	1	1	1	1	1	1	0	0	0	Phosphomevalonate kinase
total	393	315	451	444	458	494	301	435	515

## Sheet: efflux pumps
pfam	ncr	mel	vpy	mgr	cpa	vma	dhe	dam	ocj	annot
PF13000.4	0	1	1	1	1	1	1	1	1	Acetyl-coenzyme A transporter 1
PF05631.11	0	0	2	3	2	2	3	4	5	Sugar-tranasporters, 12 TM
PF00854.18	1	2	3	4	4	3	2	5	3	POT family
PF11700.5	0	2	2	2	1	2	1	2	1	Vacuole effluxer Atg22 like
PF07690.13	113	181	296	244	316	296	228	330	394	Major Facilitator Superfamily
PF03209.12	1	1	0	0	0	0	0	0	0	PUCC protein
PF03092.13	0	0	0	1	0	0	0	0	0	BT1 family
PF12832.4	0	0	1	1	1	1	1	0	1	MFS_1 like family
PF06813.10	0	1	1	1	1	1	1	1	2	Nodulin-like
PF00083.21	52	91	142	114	166	143	119	151	185	Sugar (and other) transporter
PF13347.3	5	3	4	6	4	3	6	3	2	MFS/sugar transport protein
PF06963.9	1	0	1	1	1	1	0	1	1	Ferroportin1 (FPN1)
PF05977.10	1	1	2	2	2	2	0	1	2	Transmembrane secretion effector
PF01733.15	1	1	1	1	1	1	1	1	1	Nucleoside transporter
PF06609.10	14	22	35	18	43	40	26	30	46	Fungal trichothecene efflux pump (TRI12)
PF03239.11	1	1	1	1	0	1	1	1	1	Iron permease FTR1 family
PF06779.11	2	1	2	4	4	3	3	4	1	Uncharacterised MFS-type transporter YbfB
PF05978.13	3	2	7	4	5	6	2	9	7	Ion channel regulatory protein UNC-93
total MFS	195	310	501	408	552	506	395	544	653
PF00005.24	25	30	47	50	44	51	34	48	47	ABC transporter
total	220	340	548	458	596	557	429	592	700

## Sheet: antismash
cluster	ncr	mel	vpy	mgr	cpa	cau	ccu	cde	vma	dhe	dam	das	dlo	ocj
arylpolyene	0	0	0	1	0	0	0	0	0	0	0	0	0	0
indole	1	4	1	2	1	0	1	0	1	1	3	0	4	1
indole-t1pks	0	0	1	1	0	0	1	1	1	0	1	0	0	0
indole-t1pks-nrps	0	0	0	0	0	0	0	0	0	0	1	0	0	0
indole-nrps	0	0	0	0	0	0	0	0	0	0	0	0	1	0
lantipeptide	1	0	0	0	0	0	0	0	0	0	0	0	0	0
lantipeptide-t1pks	0	0	1	0	1	0	1	0	1	0	1	1	0	0
nrps	3	11	8	10	4	2	6	1	11	0	8	4	15	7
other	3	10	6	5	7	4	9	2	5	0	10	6	12	14
siderophore	0	1	0	0	0	0	0	0	0	1	1	1	1	0
phosphonate	0	0	0	0	1	0	1	0	0	0	0	0	0	0
t1pks	6	38	20	15	16	6	18	9	24	2	27	20	34	32
t1pks-terpene	0	0	0	0	1	0	0	0	0	0	0	1	0	0
t1pks-terpene-nrps	0	0	0	0	0	0	0	0	0	0	0	0	1	0
t1pks-nrps	0	2	3	4	6	4	7	5	5	0	2	2	10	7
t3pks	1	1	0	1	1	0	0	1	1	0	2	1	1	2
t3pks-t1pks	0	1	0	0	0	0	0	0	0	0	1	0	0	0
terpene	3	6	4	6	6	2	3	5	4	2	7	3	6	9
terpene-t1pks	0	0	0	0	0	0	0	0	1	0	0	0	0	0
terpene-t1pks-nrps	0	0	0	1	0	0	0	0	0	0	1	0	0	0
terpene-nrps	0	1	0	0	0	0	1	0	0	0	0	0	0	0
total	18	75	44	46	44	18	48	24	54	6	65	39	85	72
total gene number	10813	16656	10855	11054	11609	13484	13121	13772	11284	14220	10704	14962	16596	11247
clusters per 1000 genes	1.66466	4.50288	4.05343	4.16139	3.79016	1.33492	3.65826	1.74267	4.78554	0.421941	6.0725	2.6066	5.12172	6.40171
N50	6000761	1935326	238843	2890137	5118729	47043	156096	83661	3351076	6347	132346	86905	204364	151242
host	bread	maize	pear	rice	chestnut	eucalyptus	eucalyptus	eucalyptus	apple	sunflower	Commiphora wightii	soybean	soybean	butternut tree
life style	mold	rot	canker	rot	canker	canker	canker	canker	canker	canker	endophytic	canker	seed decay	canker
